# Supplementary material for: Expression Profiling during Arabidopsis/Downy Mildew Interaction Reveals a Highly-Expressed Effector That Attenuates Responses to Salicylic Acid
Source: PLoS Pathog. 2014 Oct 16;10(10):e1004443. doi: 10.1371/journal.ppat.1004443 (PMC4199768; doi:10.1371/journal.ppat.1004443)
Supplement: Dataset S2 — The expression patterns of Hpa Emoy2 genes. (XLSX) [file ppat.1004443.s002.xlsx]

## Sheet: up to 10 matching read data
Dataset S2-1. The expression patterns of Hpa Emoy2 genes.
Gene IDa	Emoy2 csb	Emoy2 1 dpib
800000	0.13873	0
800001	76.5272	76.7295
800002	30.7413	0
800003	12.1203	11.055
800004	1.23137	0
800005	24.4533	11.055
800007	0.112833	0
800009	67.5135	0
800010	0.329253	0
800013	6.31385	0
800014	436.164	498.475
800018	166.568	221.1
800019	2.83563	22.11
800020	326.453	358.247
800024	27.549	44.22
800025	59.0675	36.2599
800026	357.979	182.218
800027	46.2766	22.11
800028	31.0513	36.2599
800029	9.74705	22.11
800030	103.884	72.5198
800031	4.20582	0
800032	113.106	0
800033	0.338498	0
800034	17.743	0
800035	64.6385	116.74
800038	7.90852	0
800039	24.2169	0
800040	1.10984	0
800041	17.804	29.48
800043	3.26847	0
800044	9.67328	11.055
800045	39.6236	281.254
800046	43.5975	431.226
800047	2.61811	36.7193
800048	0.112833	0
800049	9.20833	0
800050	5.49758	0
800052	0.338498	0
800053	7.20727	73.4385
800054	38.3764	36.2599
800055	5.74869	0
800059	31.9495	0
800060	3.41609	0
800061	5.31427	72.5198
800062	53.8361	0
800063	70.5923	249.467
800064	3.65876	72.5198
800065	5.08304	0
800066	90.733	36.7193
800069	0.676996	0
800070	151.058	279.145
800072	54.5275	73.4385
800074	12.8777	0
800075	7.22337	0
800076	0.112833	0
800078	0.112833	0
800079	0.164626	0
800080	5.31585	0
800082	3.07869	0
800083	67.1905	206.098
800084	11.7887	0
800086	254.16	219.397
800087	20.4384	22.11
800088	58.0209	22.11
800089	17.8178	0
800090	49.4077	58.3699
800091	373.512	80.4799
800094	19.3709	22.11
800096	18.4449	0
800097	13.2655	0
800098	25.7536	190.178
800099	0.197552	0
800101	0.112833	0
800104	94.266	22.11
800107	122.884	0
800108	6.14913	0
800109	1.23997	0
800110	23.0894	24.321
800112	0.225665	0
800113	12.0582	2.76375
800114	66.0412	194.651
800115	23.212	36.2599
800116	124.838	235.317
800117	43.5892	110.55
800118	138.963	147.269
800119	6.94701	80.9393
800120	61.7549	86.2572
800121	2.54893	0
800123	5.14974	22.11
800124	5.87972	0
800125	194.32	22.11
800127	0.728789	0
800128	832.062	754.983
800129	79.7007	255.197
800130	1.58652	0
800131	8.94788	0
800133	95.9798	41.5666
800137	76.4418	132.66
800138	33.6645	182.678
800139	36.803	94.6298
800141	137.197	58.8293
800142	1.94221	36.7193
800143	95.2923	225.979
800144	163.525	58.3699
800145	42.7766	109.239
800146	261.5	66.33
800147	2.6538	0
800148	87.1339	0
800149	48.5509	145.499
800150	179.459	132.268
800151	25.893	94.6298
800152	76.6437	145.499
800154	1.38739	0
800157	2.6539	0
800160	55.9511	63.6766
800164	3.89377	0
800165	109.834	0
800166	121.356	66.33
800167	1.28371	0
800168	0.442085	0
800170	8.3344	0
800171	89.2515	44.22
800172	57.5364	0
800173	98.2091	106.604
800174	112.332	102.59
800175	28.836	36.7193
800176	7.26721	0
800177	2.09888	0
800178	0.893416	0
800179	21.9465	0
800180	132.541	110.55
800181	5.91432	0
800182	40.3231	102.59
800183	3.81553	0
800184	11.3061	0
800185	52.0193	0
800186	36.0827	22.11
800187	58.5755	183.596
800189	5.3411	0
800190	62.7248	0
800191	16.2676	58.3699
800193	33.6254	124.7
800194	27.1503	0
800196	0.94521	22.11
800197	116.718	44.22
800198	1.05804	0
800200	0.667751	0
800201	21.2168	22.11
800202	82.7326	102.59
800204	121.27	94.6298
800205	0.858919	0
800206	42.4947	0
800208	24.8635	0
800209	40.1736	0
800210	51.3372	58.8293
800211	44.2278	58.8293
800212	64.4532	22.11
800213	5.10729	0
800217	3.79704	0
800218	41.0377	80.4799
800219	4.46608	0
800220	39.7217	22.11
800221	165.418	22.11
800222	4.00372	0
800223	35.9767	0
800224	0.390292	0
800225	9.10355	0
800226	28.5935	36.2599
800228	75.7082	44.22
800230	629.687	259.833
800231	97.7464	77.385
800232	0.195146	0
800233	0.0823132	0
800234	48.7729	176.488
800235	2.81898	0
800237	0.249822	0
800238	43.4459	22.11
800239	8.15193	11.055
800240	69.368	11.055
800241	0.0823132	0
800242	0.0752217	0
800243	1.28311	55.0789
800244	16.8714	5.5275
800248	12.0555	0
800250	21.8935	0
800251	1.01549	36.2599
800252	73.7033	44.22
800253	61.6756	36.2599
800254	2.8139	0
800255	87.7408	36.7193
800256	45.732	146.877
800257	24.9342	0
800258	5.6969	22.11
800259	49.8218	80.4799
800260	320.311	344.097
800261	137.724	220.708
800262	4.99455	36.2599
800264	30.259	22.11
800265	102.261	44.22
800266	9.93821	0
800267	176.918	94.6298
800268	4.71014	0
800270	7.386	183.137
800271	1.9607	0
800272	15.6946	0
800273	21.3748	73.4385
800274	115.856	0
800281	70.4576	44.22
800285	0.225665	0
800289	0.338498	0
800293	5.58248	0
800294	71.2532	22.11
800295	42.43	0
800298	33.974	0
800299	83.0531	110.158
800300	2.47188	0
800301	2.56632	0
800302	2.09501	0
800303	27.9516	0
800305	74.0154	36.7193
800307	0.615957	0
800309	11.3187	0
800310	0.0274377	0
800311	2.46273	0
800312	7.51346	0
800314	105.272	110.158
800315	208.564	95.5485
800316	8.67986	0
800317	41.7783	22.11
800319	43.711	22.11
800321	10.7961	0
800322	40.1605	36.7193
800323	48.73	0
800326	49.7453	176.488
800327	46.2712	80.4799
800328	183.793	108.78
800329	107.864	22.11
800331	68.1617	11.055
800334	5.10429	11.055
800337	0.282082	0
800338	25.4729	0
800339	91.1484	44.22
800342	12.6337	0
800343	80.5509	94.6298
800345	12.3457	0
800346	3.31469	0
800347	10.2238	0
800348	209.668	175.11
800349	75.627	0
800351	0.615957	0
800354	0.164626	0
800356	0.493879	0
800357	661.456	543.546
800358	5.88897	0
800359	32.8624	0
800362	4.35423	11.055
800364	1.61758	0
800367	4.93914	0
800368	71.7696	80.4799
800369	138.478	73.4385
800370	332.968	256.968
800374	0.664205	0
800377	33.478	0
800378	23.0758	47.5446
800379	10.7309	0
800380	23.4873	62.5143
800381	19.5398	11.055
800382	55.2779	55.0789
800383	16.8439	18.3596
800384	35.4611	36.2599
800385	5.38868	18.13
800386	0.867519	18.3596
800387	9.69762	0
800388	4.86959	0
800391	40.5937	175.11
800392	0.0564163	0
800393	50.4156	2.211
800394	2.65197	0
800395	16.5628	36.2599
800396	446.228	460.769
800397	152.917	58.3699
800399	14.4837	0
800400	1.93297	0
800403	46.4331	90.6498
800404	7.47484	11.055
800405	37.9327	18.13
800406	35.0422	0
800407	0.503124	0
800410	7.96026	0
800411	6.37777	0
800412	23.4724	0
800413	265.442	266.678
800414	5.87972	18.13
800415	36.635	0
800416	33.3453	36.7193
800417	30.7064	18.3596
800419	10.0544	11.055
800420	164.345	113.678
800421	150.939	69.6546
800422	8.6559	0
800423	115.738	282.794
800424	0.446708	0
800427	43.7848	22.11
800430	11.4452	0
800431	4.42736	11.055
800436	87.954	44.22
800437	1.11908	0
800439	32.2701	0
800440	4.73549	0
800441	0.164626	0
800442	2.58362	0
800449	26.0493	109.469
800452	13.1793	0
800453	27.1426	22.11
800454	12.288	0
800455	1.11908	0
800456	23.1771	0
800459	146.303	22.11
800461	18.0643	0
800462	27.298	0
800463	219.191	490.974
800464	38.6317	22.11
800465	19.8317	0
800467	1.18817	0
800469	3.32165	0
800470	11.3843	0
800471	28.5643	72.5198
800472	33.7583	95.5485
800473	1.43909	0
800477	81.0983	80.9393
800478	19.6218	36.2599
800483	57.5593	36.4896
800484	66.0596	73.4385
800485	86.2115	0
800486	93.0054	22.11
800495	66.963	58.3699
800496	49.0093	0
800497	9.00482	0
800500	27.3138	0
800501	97.8187	167.609
800503	676.292	1791.02
800504	1.95146	0
800505	21.2149	72.5198
800506	4.29266	0
800507	142.637	72.5198
800508	99.8961	22.11
800509	18.6378	73.4385
800510	68.8979	94.6298
800511	65.5253	0
800514	0.112833	0
800520	102.776	22.11
800523	0.997004	0
800525	126.689	365.747
800528	102.007	65.4449
800529	7.82203	36.2599
800531	10.5434	0
800532	130.049	219.397
800533	3.64175	0
800534	224.682	131.349
800537	990.445	658.975
800538	33.0041	22.11
800539	5.10033	22.11
800548	58.2059	80.9393
800549	0.225665	0
800550	2.81843	0
800552	361.516	204.788
800553	3.20762	0
800554	4.63061	0
800556	7.52618	0
800558	0.329253	0
800560	46.0097	22.11
800561	1.62221	0
800564	1.674	0
800565	59.2064	22.11
800566	88.9926	66.33
800567	1.68324	0
800568	29.1685	0
800569	11.7772	0
800570	46.0629	0
800571	10.4068	36.2599
800572	45.0966	44.22
800574	358.039	286.186
800576	39.212	0
800578	5.15332	0
800579	43.3174	108.78
800580	205.471	103.049
800581	2.0458	0
800582	76.7484	0
800584	0.615957	0
800585	1.10984	0
800586	18.511	0
800589	6.83298	22.11
800592	0.112833	0
800594	0.164626	0
800596	2.81157	0
800598	0.225665	0
800599	12.0556	22.11
800600	44.549	44.22
800605	5.13383	0
800607	42.9997	0
800608	52.3245	102.59
800609	46.8721	58.3699
800611	1.6568	0
800612	14.2373	36.2599
800613	10.0314	0
800614	3.18228	36.2599
800615	3.80077	0
800616	0.955895	0
800617	11.0283	0
800618	3.64961	0
800619	9.02027	27.5394
800620	1.55192	0
800621	0.251562	0
800622	5.91312	0
800623	0.493879	0
800624	11.7025	0
800625	75.2544	36.2599
800626	0.338498	0
800627	385.232	649.704
800628	84.3119	36.2599
800629	413.807	226.898
800630	13.5441	0
800631	8.02025	0
800634	433.056	285.267
800635	499.491	22.11
800636	0.164626	0
800638	28.5115	22.11
800639	13.2321	0
800640	42.5464	22.11
800641	6.9472	0
800642	30.2685	73.4385
800643	8.07285	0
800644	180.821	124.7
800645	1.00625	0
800646	26.6778	36.7193
800648	10.6244	66.33
800649	73.2908	0
800650	0.771338	0
800651	5.17017	0
800653	96.1249	256.049
800654	79.3082	58.3699
800657	0.667751	0
800659	6.7455	0
800660	32.5689	22.11
800663	0.338498	0
800664	0.962507	0
800665	42.0935	44.22
800666	12.2261	0
800667	0.94521	0
800668	64.5407	73.4385
800671	9.22241	0
800672	81.0574	56.6129
800673	10.7766	0
800680	17.2191	0
800681	23.9483	22.11
800682	97.0881	66.33
800683	118.297	95.0892
800684	141.722	306.459
800685	27.559	168.068
800686	72.7945	138.85
800687	12.4344	22.11
800688	0.112833	0
800689	0.45133	0
800692	0.658506	0
800693	10.6144	36.7193
800694	2.14153	0
800696	629.163	850.531
800697	2.34175	0
800698	0.954455	0
800699	88.6028	0
800700	37.1202	83.5748
800703	1.35678	0
800704	121.519	190.638
800707	24.0964	0
800708	0.771338	0
800709	123.824	22.11
800710	171.138	138.85
800711	3.36539	0
800714	13.8556	0
800720	6.49775	0
800724	4.15489	0
800727	5.18572	0
800729	213.54	154.77
800730	103.01	36.7193
800731	2.67915	44.22
800732	0.615957	22.11
800735	44.9384	285.66
800737	0.0411566	0
800738	15.8503	0
800739	0.225665	0
800742	12.8924	0
800743	73.295	72.5198
800746	72.3027	0
800750	42.3126	0
800752	30.7039	0
800753	1.68787	0
800754	18.1496	0
800755	14.8763	18.13
800757	186.784	94.6298
800758	101.664	36.7193
800764	0.503124	0
800765	13.3402	36.2599
800766	4.31756	0
800767	1.12713	0
800768	9.52157	0
800769	187.464	366.666
800770	5.82583	0
800771	50.9179	18.3596
800772	96.2577	0
800775	10.3883	0
800777	39.4524	0
800778	70.9632	94.6298
800779	138.118	88.44
800781	1.47378	0
800784	34.2058	0
800785	12.7888	0
800786	729.346	348.236
800790	18.4073	0
800791	90.7156	73.4385
800792	72.5003	73.4385
800793	13.8747	0
800794	21.7473	22.11
800795	81.1374	109.239
800796	21.6379	58.3699
800797	129.971	189.26
800802	279.903	22.11
800803	0.771338	0
800805	0.0564163	0
800806	6.27244	0
800808	0.935965	0
800810	1.51752	0
800812	11.2999	22.11
800813	1.56117	0
800814	59.7402	102.59
800815	817.753	470.634
800816	143.35	95.0892
800818	4.717	0
800820	9.59037	108.78
800821	32.9649	0
800822	23.1795	36.7193
800823	32.9687	0
800825	7.32577	0
800826	0.112833	0
800828	67.65	44.22
800829	27.3313	22.11
800830	90.4417	66.33
800832	75.5328	146.877
800833	0.277459	0
800834	0.17634	0
800837	3.58996	0
800838	2.83582	0
800839	44.6154	213.207
800840	151.133	66.33
800841	3.57247	0
800842	108.895	36.2599
800843	0.338498	0
800845	7393.23	3067.91
800846	7390.38	3031.65
800848	5.72208	0
800850	52.5568	72.9792
800851	5.98341	0
800852	8.60952	0
800854	184.54	58.3699
800855	64.8883	0
800856	155.417	72.9792
800858	0.262398	0
800859	3.27897	0
800860	1.92766	0
800863	104.074	110.158
800864	1756.59	1215.43
800866	18.5836	44.22
800867	0.329253	0
800868	19.2795	0
800870	0.728789	0
800871	64.6635	0
800872	116.357	285.267
800873	169.192	80.4799
800875	77.5947	22.11
800876	4.89992	0
800877	13.5373	0
800878	24.5302	0
800879	75.2929	94.6298
800880	94.2271	299.81
800881	43.2967	0
800882	31.4322	109.698
800883	790.633	438.659
800884	2.83563	0
800885	40.6669	66.33
800886	1.0488	36.2599
800888	215.563	160.96
800889	4.73429	0
800890	31.3601	22.11
800891	15.6336	0
800893	32.3929	0
800895	6.59753	0
800896	199.869	154.378
800897	149.089	88.44
800898	35.1872	0
800901	1.40061	11.055
800903	96.0055	44.22
800904	9.62478	22.11
800905	28.224	44.22
800906	19.4223	36.7193
800909	19.7421	36.2599
800910	79.6752	110.158
800911	108.327	189.719
800912	25.7806	0
800914	0.338498	0
800915	79.6036	58.3699
800916	15.217	73.4385
800917	0.771338	0
800918	43.2049	132.268
800920	193.507	116.74
800921	21.7982	0
800924	26.4184	44.22
800925	21.3663	0
800928	147.511	108.78
800930	0.164626	0
800931	0.202237	0
800935	119.807	94.6298
800938	141.247	94.6298
800945	71.8811	0
800947	94.773	58.8293
800948	9.42028	1333.67
800950	5.3583	0
800951	0.112833	0
800952	23.0979	0
800953	91.1006	0
800954	5.57582	0
800956	412.778	389.235
800958	29.109	0
800960	2.47138	18.13
800961	0.609794	0
800963	2.11151	11.055
800965	0.0376109	0
800967	187.236	0
800968	30.6365	36.2599
800970	23.2608	36.2599
800971	12.7288	0
800972	264.117	0
800973	292.866	95.0892
800974	19.3138	0
800978	456.738	1149.1
800979	51.7482	0
800983	4.50844	0
800985	2.31993	0
800987	2.16612	0
800988	23.1053	40.4696
800989	97.3175	51.295
800990	97.5222	130.89
800992	79.9701	0
800994	48.3306	36.2599
800995	57.5157	72.5198
800996	0.493879	0
800997	0.0182918	0
800998	1.39654	66.33
800999	8.4194	36.2599
801003	10.6531	0
801004	3016.47	2062.32
801006	14.9822	0
801009	60.2576	0
801011	69.3823	209.193
801012	19.0398	0
801013	223.502	201.889
801014	159.227	38.4709
801015	5.1637	0
801016	0.221043	0
801017	6.87655	0
801018	38.7164	0
801020	173.798	575.24
801021	113.505	69.6546
801022	72.7057	18.13
801023	4.72038	0
801024	0.385669	0
801025	7.44281	0
801026	0.0823132	0
801027	4.71824	0
801028	1.90314	0
801029	0.112424	0
801030	62.5769	11.055
801031	0.311988	0
801032	0.656649	0
801033	16.9434	0
801034	113.237	22.11
801036	52.9711	116.74
801039	29.8985	110.158
801041	102.751	0
801042	7.82223	0
801043	33.6072	80.4799
801044	64.4922	66.33
801045	339.234	241.966
801048	15.8902	29.185
801051	51.5739	0
801052	11.5061	0
801053	27.9727	44.22
801054	78.4984	22.11
801056	44.7658	146.877
801057	33.095	0
801058	185.221	293.754
801060	10.4241	0
801061	2.37127	0
801062	7.35648	0
801064	180.738	0
801065	8.32456	0
801066	4.65655	0
801067	160.185	211.829
801068	250.93	58.8293
801069	26.2132	22.11
801070	1313.64	1048.67
801071	1.3873	0
801072	89.3012	72.5198
801073	113.752	337.907
801074	32.1441	0
801076	192.968	58.3699
801077	48.5412	76.7295
801079	348.523	490.447
801080	36.7313	36.7193
801081	3.58996	0
801082	172.487	131.808
801084	290.319	432.929
801086	49.5328	117.199
801087	10.1889	0
801088	46.9713	95.5485
801089	2.86217	0
801090	1.43113	0
801092	3.12133	0
801096	55.0638	146.877
801097	16.2636	0
801098	53.457	254.738
801099	27.1471	0
801100	5.04486	0
801101	0.407588	0
801103	202.86	72.5198
801104	32.5789	36.2599
801105	28.0464	0
801108	6.72006	0
801110	1.19063	0
801111	96.8905	293.754
801112	51.637	0
801113	11.1138	0
801114	2.61006	0
801115	12.1558	0
801116	20.4109	0
801117	11.619	0
801119	14.213	0
801120	557.921	381.275
801121	0.329253	0
801122	133.394	131.808
801123	15.7996	0
801124	97.275	36.2599
801127	28.3327	11.055
801130	0.112833	0
801134	0.884171	0
801136	2.97436	0
801137	2.06329	0
801139	138.71	191.097
801140	76.5588	0
801141	42.3793	110.158
801145	0.0282082	0
801146	18.4342	0
801147	4.90807	0
801149	623.721	314.878
801151	130.616	204.788
801152	9.54702	0
801153	40.1468	22.11
801154	350.905	592.645
801156	27.638	44.22
801157	34.931	42.3032
801158	1.90459	0
801159	663.845	755.05
801160	27.0072	36.7193
801161	0.307978	0
801163	1573.37	483.798
801166	2.93479	0
801167	23.6964	0
801168	33.2272	22.11
801169	0.112833	0
801171	62.5378	0
801172	52.4428	0
801173	0.311988	0
801174	36.7206	0
801176	43.549	58.8293
801177	10.1967	0
801182	23.0831	36.2599
801183	31.207	72.5198
801184	6.79729	36.2599
801185	5.21993	0
801186	1.21342	0
801187	0.338498	0
801188	1.17087	0
801189	0.719544	0
801190	31.6555	66.33
801193	16.8487	22.11
801194	45.2971	0
801196	135.131	94.6298
801197	1.83863	0
801198	0.225665	0
801200	10.1974	58.3699
801202	3.14778	0
801204	2.48798	22.11
801205	1.66475	0
801206	10.719	22.11
801208	0.112833	0
801209	21.5546	22.11
801210	20.9242	36.2599
801211	591.578	571.779
801212	163.031	306.459
801214	35.6537	0
801215	0	0
801217	0.997004	0
801220	6.06174	0
801221	0.338498	0
801224	21.548	0
801225	54.5375	0
801226	167.091	160.96
801227	3.71999	0
801228	33.6876	66.33
801229	27.3576	124.7
801231	0.329253	0
801232	49.1215	36.7193
801233	4.04229	0
801234	9.89447	36.2599
801235	0.390292	0
801236	0.390292	0
801237	119.908	94.6298
801239	242.196	36.2599
801240	140.365	36.2599
801241	5.54937	0
801242	20.8756	109.698
801243	30.0234	0
801244	191.751	44.22
801245	2.68835	0
801246	0.94521	0
801247	100.344	72.9792
801248	109.399	0
801249	3.55875	0
801250	47.3898	110.158
801251	69.6346	0
801252	1.11789	0
801253	9.48588	0
801254	35.3899	0
801255	59.1171	36.2599
801259	17.3348	11.055
801260	53.69	36.2599
801261	59.3094	147.269
801262	30.7459	211.37
801263	229.547	80.4799
801264	24.0364	22.11
801267	52.2673	36.2599
801268	76.7978	0
801269	74.2885	94.6298
801270	181.956	109.698
801271	11.0721	0
801272	2.05505	0
801273	0.164626	0
801275	0.112833	0
801276	10.9421	36.2599
801277	76.8891	22.11
801278	99.7028	58.3699
801279	40.3124	0
801280	0.225665	0
801281	68.4891	227.816
801282	32.0412	22.11
801283	160.163	0
801284	38.2661	0
801285	9.80689	0
801287	3.01765	0
801289	5.53088	0
801290	253.29	586.982
801291	7.00686	0
801292	0.390292	0
801294	12.0429	22.11
801296	5.12459	0
801298	1.04889	0
801302	4.93351	0
801303	0.112833	0
801304	337.666	130.89
801305	55.4608	58.3699
801306	56.0756	0
801307	19.1545	0
801312	0.164626	0
801313	6.20181	0
801315	1.10993	0
801316	1.69944	0
801317	2.07234	0
801319	3.19162	0
801321	103.142	94.6298
801322	71.1638	36.7193
801323	98.0034	116.74
801327	93.6399	36.2599
801328	194.707	47.3149
801330	62.3201	138.85
801331	0.935965	0
801332	18.4938	0
801333	23.5091	0
801334	269.833	44.22
801335	52.6408	72.5198
801336	296.661	190.178
801337	0.446708	0
801339	42.8991	0
801340	39.0669	11.055
801341	253.947	248.778
801342	1.87322	18.13
801343	25.2606	65.4449
801344	37.2405	18.13
801345	7.93884	0
801346	3.09524	0
801347	12.5914	0
801348	89.0682	83.8045
801349	2.66126	0
801351	34.9392	54.3899
801353	22.555	80.4799
801355	2.97561	0
801356	0.164626	0
801360	2.71678	0
801362	0.731307	0
801364	7.3535	58.8293
801366	45.9235	58.3699
801367	33.3021	73.4385
801368	143.487	0
801370	45.1593	44.22
801374	25.6319	36.2599
801375	34.5084	73.4385
801376	44.7584	58.3699
801377	133.83	44.22
801380	5.20463	0
801381	621.673	182.218
801382	0.225665	0
801384	59.4533	0
801385	0.333875	0
801386	113.029	146.877
801387	47.0695	22.11
801388	3.59911	0
801391	13.0939	22.11
801392	18.3071	22.11
801394	79.2724	36.7193
801395	46.0933	0
801396	1.11908	0
801398	0.250021	0
801399	68.8147	73.4385
801402	0.164626	0
801407	12.5806	0
801408	20.4606	0
801410	0.935965	0
801411	142.855	36.2599
801412	69.3787	0
801414	97.4195	18.3596
801415	3.3642	0
801416	0.225665	0
801417	17.4367	0
801420	164.297	227.357
801421	152.279	110.158
801426	150.092	36.7193
801427	1.89514	0
801429	12.4399	36.7193
801430	1.00508	0
801431	0.503124	0
801434	21.2019	0
801435	2.02174	0
801436	1.2183	0
801437	3.57157	0
801438	350.774	352.583
801439	9.30396	0
801440	34.7827	130.89
801441	484.915	548.884
801443	25.0621	0
801449	1.41846	0
801450	19.9383	0
801451	30.2806	0
801453	328.144	302.742
801457	0.112833	0
801460	167.429	120.524
801461	3.57307	11.055
801470	0.277459	22.11
801471	11.863	58.3699
801472	32.6906	22.11
801473	16.5941	0
801475	382.832	121.179
801477	920.697	329.028
801478	175.931	131.349
801479	20.1608	58.3699
801480	105.607	94.6298
801481	92.7313	103.049
801482	5.6807	0
801483	43.3417	95.5485
801484	74.0348	80.4799
801485	291.985	94.6298
801486	4.0239	66.33
801487	146.727	227.749
801488	22.6383	0
801489	136.376	138.883
801494	0.94521	0
801495	120.422	66.33
801496	24.1074	22.11
801497	13.1111	44.22
801504	0.733412	0
801507	23.3891	11.055
801509	0.307978	0
801511	0.416189	0
801513	1.46499	0
801514	27.2726	36.2599
801515	1.87839	18.13
801516	1.3096	18.13
801517	11.7679	11.055
801519	75.7167	138.654
801520	0.670822	0
801521	5.19852	0
801522	0.0823132	0
801525	2.74934	0
801526	6.43524	22.11
801527	1.75984	0
801528	24.9956	22.11
801529	0.867519	0
801530	0.338498	0
801531	1.23997	0
801532	2.63651	0
801533	4.38755	22.11
801534	2.40169	0
801536	4.6647	0
801537	3.13446	0
801538	0.305667	0
801539	1784.89	2333.07
801540	1513.65	1813.01
801541	55.9346	137.664
801545	37.5554	0
801546	58.0326	0
801547	0.112833	0
801549	33.1683	270.658
801550	41.6026	0
801551	197.313	22.11
801553	42.5206	18.3596
801554	38.1297	76.7295
801555	177.51	36.2599
801556	28.0554	80.4799
801557	4.952	0
801558	66.1151	22.11
801559	63.1374	0
801560	76.3534	0
801562	2.11608	0
801563	41.7163	0
801564	72.5983	94.6298
801566	91.13	117.199
801567	24.3859	22.11
801568	14.1344	0
801570	42.6964	80.4799
801574	83.2658	0
801575	165.079	0
801577	17.361	36.2599
801578	1.00625	0
801579	83.11	0
801580	7.91657	0
801581	15.1309	145.04
801583	0.277459	0
801587	314.656	183.137
801588	0.667751	0
801589	0.338498	0
801594	107.387	36.7193
801595	111.413	58.3699
801596	5.21527	29.48
801597	1.26243	0
801598	0.53767	0
801599	6.08211	0
801600	2.36312	0
801601	105.113	117.659
801602	11.1772	0
801603	84.8452	36.2599
801605	0.954455	0
801606	50.3623	190.069
801607	4.57748	0
801608	1.95961	0
801609	104.26	306.328
801611	27.1079	0
801612	950.661	591.726
801613	29.8978	0
801614	2.43738	44.22
801615	23.2737	36.2599
801617	17.7638	0
801621	226.164	329.88
801623	41.6996	36.2599
801624	109.468	0
801625	19.6672	0
801627	11.7239	58.3699
801628	14.8624	22.11
801629	24.8961	0
801630	0.277459	0
801631	9.52982	0
801633	0.164626	0
801634	48.9991	58.3699
801635	73.6845	95.5485
801636	20.8711	36.7193
801639	209.293	336.137
801644	4.09697	0
801646	55.1603	0
801647	198.688	272.036
801649	19.9252	0
801650	0.79788	0
801652	14.7494	0
801653	46.5549	84.4935
801654	30.9442	0
801655	3.76374	0
801656	0.277459	0
801657	3.88462	0
801658	6.2137	0
801660	54.9628	95.0892
801661	29.705	72.5198
801663	7.09444	0
801665	0.277459	0
801666	0.823132	0
801667	12.006	36.7193
801668	6.25152	0
801669	0.503124	0
801671	413.235	700.506
801672	4.48189	0
801673	75.6137	0
801675	1.76844	0
801677	77.5588	130.89
801678	52.4688	72.9792
801679	5.12568	58.3699
801680	0.997004	0
801681	2.14382	0
801682	0.164626	0
801685	2.08049	0
801687	0.112833	0
801688	29.7159	22.11
801692	8.11126	73.4385
801693	0.277459	0
801694	0.390292	0
801695	1.28371	0
801696	0.112833	0
801697	0.164626	0
801698	67.8441	58.3699
801700	94.5182	36.7193
801703	62.2637	131.349
801704	26.6212	73.4385
801705	2.59739	0
801706	222.583	204.099
801707	77.9549	58.5996
801710	1.71655	0
801713	4.54956	0
801714	961.886	625.757
801715	81.7247	44.22
801716	175.383	102.59
801718	36.5721	0
801719	0.338498	0
801721	27.2853	72.5198
801723	18.2084	72.9792
801727	38.9818	234.398
801729	52.6767	36.7193
801730	3.05205	0
801731	0.564163	0
801735	0.893416	0
801738	92.6426	0
801739	4.37154	0
801740	134.582	94.6298
801741	72.8527	80.9393
801743	76.2657	0
801745	0.112833	0
801746	0.164626	0
801750	27.2497	0
801753	4.61503	72.5198
801754	0.413107	0
801755	19.1291	0
801756	5.27082	0
801757	245.428	585.077
801758	79.3242	58.3699
801759	2.29736	0
801766	181.859	0
801767	0.329253	0
801770	0.225665	0
801773	1.15207	0
801774	0.112833	0
801775	51.4445	22.11
801776	53.3025	0
801777	15.0891	36.2599
801778	143.32	153
801779	5.90976	0
801780	11.7055	44.22
801783	1.10984	0
801785	57.2841	58.3699
801786	50.1929	0
801787	54.2616	58.3699
801788	52.2911	22.11
801789	8.34236	36.2599
801791	4.45674	0
801793	1.72579	0
801794	79.6801	110.158
801795	97.0383	80.4799
801796	1.79498	0
801797	0.164626	0
801798	36.7785	44.22
801799	34.1694	72.5198
801800	3.25932	0
801801	18.5564	0
801802	6.75937	0
801803	0.169249	0
801806	76.578	182.218
801807	34.2828	22.11
801808	19.4492	0
801809	185.439	94.6298
801810	10.4366	80.9225
801811	0.112833	0
801815	152.5	205.706
801816	16.5353	80.4799
801821	2.17722	0
801823	35.3575	0
801832	2.89676	22.11
801834	2.13338	0
801835	14.8094	0
801837	16.2121	22.11
801838	0.780583	0
801840	2.26351	0
801842	4.6825	0
801845	34.9598	164.809
801847	174.61	182.678
801850	12.1924	73.4385
801851	12.8163	36.2599
801853	15.2528	0
801854	22.138	0
801856	3.64623	0
801857	68.6618	22.11
801858	3.1119	0
801860	2.05514	219.33
801861	80.593	72.9792
801862	1.17087	0
801863	0.0940272	0
801866	10.8294	0
801869	0.329253	0
801874	0.319771	0
801875	105.081	109.239
801876	93.6914	66.33
801877	604.597	597.849
801878	9.98515	91.7981
801879	0.112833	0
801881	3.348	0
801883	1.3355	0
801884	26.4618	0
801885	3.24441	0
801887	2.1807	0
801892	9.18751	11.055
801895	0.0564163	0
801896	1.47423	18.13
801897	7.6737	18.3596
801898	115.613	171.359
801899	40.7958	54.3899
801901	0.355762	0
801905	44.6321	116.74
801906	1.43919	0
801907	153.823	36.7193
801908	17.1848	0
801910	10.059	72.9792
801912	133.96	58.3699
801913	33.185	22.11
801914	316.192	504.989
801915	38.4425	132.268
801917	14.9672	0
801918	47.9496	58.3699
801919	16.8404	0
801921	97.0235	36.2599
801922	4.14598	0
801923	99.4041	102.59
801924	135.601	94.6298
801925	229.1	0
801926	20.6282	22.11
801927	9.20137	0
801928	73.9113	80.4799
801931	6.38185	0
801934	137.689	109.239
801935	278.256	600.605
801937	2.96466	0
801938	9.15763	0
801940	68.3654	116.74
801941	45.1454	22.11
801942	32.4999	0
801943	86.2887	218.478
801949	36.2807	22.11
801950	31.5313	22.11
801951	73.8168	0
801952	54.9327	22.11
801953	13.6825	36.2599
801954	19.1269	22.11
801955	4.19677	0
801962	107.084	58.3699
801963	14.4215	0
801968	135.741	124.7
801969	2.22892	0
801970	58.5526	22.11
801971	7.11988	0
801972	27.0343	22.11
801975	8.69129	58.8293
801978	5.00236	36.2599
801979	4.7342	0
801980	3.95471	0
801981	13.8564	0
801987	8.16768	58.3699
801988	6.84233	0
801989	167.674	218.478
801990	9.36342	0
801991	6.43012	0
801992	98.1247	58.3699
801993	6.7455	0
801994	601.344	890.225
801995	274.151	72.5198
801996	33.6005	0
801998	5.92247	22.11
801999	0.923935	0
802002	0.552631	0
802003	10.066	0
802004	31.519	36.7193
802005	4.80567	0
802006	106.034	110.55
802007	14.6482	0
802008	126.917	94.6298
802010	35.1084	0
802011	11.6441	0
802014	79.6849	116.74
802015	5.42859	0
802016	9.7044	0
802017	36.0876	0
802018	21.4898	0
802019	0.442085	0
802020	0.554918	0
802022	25.5017	22.11
802023	64.2732	0
802027	15.2445	22.11
802028	139.433	452.876
802031	6.6776	0
802032	62.6144	72.5198
802033	5.14198	0
802034	69.2071	161.879
802035	129.404	58.8293
802036	51.2737	36.2599
802037	865.509	454.255
802038	1003.37	543.154
802039	40.5544	0
802040	158.661	220.316
802041	78.9689	72.5198
802042	221.045	389.168
802045	186.533	94.6298
802046	80.8046	22.11
802047	107.44	109.698
802051	86.8914	226.438
802052	105.517	109.698
802055	0.0823132	0
802057	119.08	95.5485
802058	6.97236	0
802059	15.5807	58.3699
802061	53.2781	72.5198
802062	45.9664	0
802064	230.758	11.055
802065	94.5407	153
802070	214.027	131.349
802071	2.23707	0
802073	10.8162	0
802074	6.06915	33.165
802075	0.884268	0
802076	55.0358	66.33
802077	31.5084	22.11
802079	29.2284	0
802083	34.5096	0
802084	5.35721	0
802085	4.84822	0
802086	1.01549	22.11
802087	37.1277	0
802088	1.3355	0
802089	71.9739	22.11
802090	26.4714	0
802091	3.32951	0
802092	15.0192	73.4385
802093	624.024	432.145
802094	130.744	249.926
802095	0.277459	0
802096	0.112833	0
802097	24.8679	110.158
802098	13.1027	0
802099	34.3253	0
802100	24.6347	22.11
802102	354.562	351.665
802103	1.17087	0
802104	15.4864	0
802105	25.7797	0
802106	19.2872	0
802107	7.7599	0
802108	10.8132	36.2599
802111	2.72747	0
802112	2.73853	0
802113	229.181	124.733
802115	14.5253	0
802116	50.4257	36.2599
802117	79.0474	117.199
802120	1.6481	0
802121	0.164626	0
802122	15.3577	0
802130	100.808	0
802131	40.0435	0
802132	146.907	158.128
802133	5.49129	0
802136	4.91917	0
802137	7.72679	0
802139	2.09019	0
802140	15.2348	0
802141	117.49	44.22
802144	21.9906	0
802145	108.901	36.7193
802148	85.0093	58.8293
802149	180.763	145.499
802150	14.2535	0
802151	82.4852	36.2599
802152	189.449	176.488
802153	142.362	0
802154	1.79488	0
802156	124.155	65.6745
802157	79.4269	65.6745
802158	14.8343	0
802161	13.5681	22.11
802163	0.112833	0
802164	15.2509	22.11
802165	20.6555	36.2599
802166	20.983	36.2599
802168	84.8748	131.349
802169	5.0371	0
802172	34.6683	0
802173	5.11553	0
802174	23.238	0
802175	44.989	58.8293
802176	59.8138	108.78
802177	370.769	350.746
802178	157.002	80.4799
802179	306.535	153
802180	46.2293	0
802181	230.519	227.816
802182	7.89808	0
802183	51.5826	95.5485
802184	44.1936	0
802185	14.122	0
802188	78.6411	80.9393
802192	0.446708	0
802193	0.112833	0
802195	71.5801	110.158
802196	63.9944	0
802197	91.9304	271.51
802198	1.68205	0
802199	48.9986	22.11
802200	26.7749	94.6298
802201	50.7811	116.74
802202	76.621	88.44
802203	3.52883	0
802205	324.555	80.4799
802206	2.95393	0
802207	0.493879	0
802210	41.4259	0
802211	116.847	219.856
802212	56.4861	66.33
802214	1.17087	0
802215	15.1988	0
802216	0.164626	0
802217	2.27147	0
802218	153.158	22.11
802220	0.277459	0
802221	0.846245	0
802223	62.7408	109.698
802228	1.28371	0
802230	32.3536	0
802231	5.17748	44.22
802233	49.7281	102.59
802234	26.8108	0
802235	5.37779	36.7193
802236	13.7354	22.11
802238	12.409	108.78
802239	39.1102	44.22
802240	9.81047	0
802241	10.2514	36.2599
802242	3.53917	0
802243	112.887	36.2599
802244	28.4485	0
802245	44.023	0
802248	95.1239	36.2599
802249	570.593	285.727
802250	76.1316	36.2599
802254	0.615957	0
802255	0.109751	0
802256	0.445199	0
802257	6.35521	0
802258	0.884171	0
802261	5.85447	0
802262	19.1463	0
802267	6.696	0
802268	0.625138	0
802271	0.109751	0
802273	0.112833	0
802276	4.57891	0
802279	0.434753	0
802280	0.251562	22.11
802281	1.38332	0
802284	0.112833	0
802285	6.8893	0
802286	17.125	0
802287	1.00163	0
802288	0.477227	0
802289	30.5139	54.3899
802290	59.9747	0
802291	0.195146	0
802293	32.2197	33.165
802294	18.0905	18.13
802295	168.853	91.7981
802297	0.137619	0
802300	57.5036	36.2599
802302	3.01655	0
802303	61.1749	109.698
802304	147.91	249.4
802305	5.59221	0
802306	42.09	58.3699
802307	1723.55	1103.96
802308	9.94398	0
802309	2.70431	0
802310	34.0666	226.898
802312	17.1243	0
802314	1.49088	0
802315	24.5141	0
802316	19.085	80.4799
802318	77.4002	0
802319	38.7165	36.2599
802322	3.53807	22.11
802326	0.338498	0
802327	0.164626	0
802328	0.45133	0
802329	12.7542	0
802330	37.4882	117.199
802331	56.5919	145.499
802332	28.1596	58.8293
802333	5.79134	0
802339	18.0584	0
802340	0.564163	0
802342	89.48	72.5198
802343	0.169249	0
802344	37.2739	0
802345	91.2284	22.11
802351	14.8879	0
802352	26.0915	0
802354	17.5336	0
802358	2.7228	0
802359	200.391	22.11
802360	36.5672	0
802361	1.7591	0
802362	67.7156	36.2599
802363	193.863	988.922
802364	4.30095	0
802365	126.593	72.9792
802366	124.977	182.218
802367	6.12909	18.3596
802368	139.669	575.663
802369	448.203	474.527
802370	122.56	102.59
802371	3.14778	0
802372	26.941	0
802373	28.2511	73.4385
802375	5.44588	0
802376	4.28302	0
802377	7.57585	0
802378	0.16298	0
802381	13.7087	22.11
802382	25.8568	0
802384	3.25137	0
802385	0.606712	0
802386	7.07366	0
802387	2.86107	0
802388	1.16173	0
802389	14.1672	44.22
802390	44.8096	0
802391	86.0693	102.59
802393	39.9407	36.2599
802394	337.493	205.639
802395	691.035	444.916
802396	68.4637	94.6298
802397	5.45503	0
802399	0.615957	0
802400	20.3823	0
802403	6.93648	0
802404	0.954455	0
802405	44.0751	72.5198
802407	58.4781	44.22
802408	0.804089	0
802409	15.7811	0
802410	0.0548755	0
802412	1.51862	0
802415	0.164626	0
802416	3.46436	0
802417	15.9701	0
802418	17.7591	0
802419	1.39654	0
802420	279.281	588.293
802421	0.307657	0
802424	32.9311	36.2599
802428	60.0099	36.2599
802431	56.7792	204.328
802436	1283.24	372.329
802437	0.0823132	0
802438	28.9386	22.11
802442	15.132	47.3149
802445	61.5044	84.4935
802446	1.49098	0
802447	147.278	117.659
802448	7.68305	0
802449	319.918	440.037
802450	27.2625	110.158
802452	3.68659	130.89
802456	33.4313	22.11
802457	1266.58	520.652
802458	88.5017	91.1091
802459	8.19074	0
802462	49.3878	117.199
802465	46.4804	80.4799
802466	1.25726	0
802467	5.71519	22.11
802468	0.277459	0
802470	17.2203	0
802471	1.69944	0
802472	20.1021	36.7193
802473	106.458	154.378
802475	486.334	388.317
802476	49.6143	132.268
802477	81.0868	36.2599
802478	46.3233	72.9792
802479	66.6135	130.89
802480	0.954455	0
802481	6.79858	0
802483	0.0564163	0
802484	1.77759	22.11
802485	0.780583	0
802486	8.96388	0
802487	4.62961	0
802488	19.2735	0
802490	0.0376109	0
802491	47.9039	0
802492	0.901468	36.7193
802493	166.947	218.938
802494	31.4773	0
802495	66.71	36.2599
802496	127.918	0
802498	27.5685	0
802501	0.442085	0
802502	11.9883	84.7027
802503	71.2965	44.22
802504	32.296	0
802505	42.6811	36.7193
802506	13.2233	0
802510	4.65596	0
802511	35.9675	36.7193
802512	3.51162	0
802513	0.112833	0
802514	60.8833	0
802515	16.9869	0
802517	0.667751	0
802518	188.499	183.07
802520	35.9867	80.4799
802522	3.79933	0
802523	15.0763	0
802524	120.119	22.11
802528	11.7684	12.0866
802529	13.4179	0
802532	16.7205	36.2599
802533	43.2602	58.3699
802535	2.81728	0
802538	437.402	306.918
802540	75.8839	17.5476
802542	16.3362	0
802543	26.1981	0
802544	127.536	22.11
802545	47.1623	0
802546	24.6268	22.11
802549	29.9906	80.4799
802550	123.911	94.6298
802553	76.085	58.3699
802554	31.2009	108.78
802555	126.696	154.378
802556	0.832377	0
802558	77.8194	0
802559	21.4915	0
802560	20.5455	0
802561	30.0459	0
802563	211.424	329.028
802564	14.089	0
802565	5.52303	0
802566	28.6081	0
802567	70.9011	36.2599
802568	33.4104	36.2599
802569	4.3613	0
802571	1.43168	0
802573	50.9175	44.22
802574	14.5587	72.5198
802575	180.581	183.596
802578	124.483	109.895
802579	4.83907	22.11
802580	15.7445	72.5198
802581	11.9406	18.13
802582	24.9706	11.055
802586	4.30136	0
802587	111.217	58.8293
802588	109.767	22.11
802590	69.9695	22.11
802592	98.3416	153
802594	51.5368	22.11
802595	2.45358	72.5198
802596	25.8851	182.218
802597	75.3941	0
802598	4.82964	58.3699
802599	51.5881	153.918
802600	156.296	84.4599
802602	3.85584	54.8492
802605	455.808	462.215
802606	18.8099	58.3699
802608	49.7289	0
802609	177.329	72.5198
802610	4.82039	0
802611	21.279	0
802615	72.8787	36.7193
802616	37.9808	0
802617	4.7158	0
802618	8.42884	36.2599
802621	0.606712	0
802623	0.554918	0
802624	0.188054	0
802627	14.7163	0
802629	0.338498	22.11
802630	0.294756	0
802631	2.07234	0
802633	79.3246	76.7295
802634	9.55672	18.3596
802635	33.5409	36.7193
802636	74.6581	58.8293
802637	110.728	95.5485
802638	53.3941	0
802639	406.307	205.706
802640	68.6164	44.22
802641	15.8351	0
802644	26.4103	36.7193
802645	181.932	167.609
802647	6.87592	0
802648	32.2646	36.2599
802649	19.7329	0
802650	15.6509	22.11
802651	103.744	58.3699
802652	1.10984	0
802653	1.89966	0
802654	26.468	11.055
802655	2.66638	11.055
802656	84.4835	22.11
802657	444.592	576.658
802658	64.6211	66.33
802662	33.8813	44.22
802663	19.3457	0
802665	49.4139	110.158
802666	104.163	44.22
802667	14.832	22.11
802673	201.441	176.258
802674	119.539	113.219
802680	81.2114	22.11
802681	71.8801	108.78
802684	0.0329253	0
802685	0.112833	0
802686	0.45133	0
802691	35.7163	36.2599
802692	113.132	298.039
802693	3.0095	0
802694	18.0794	22.11
802695	130.842	153.918
802696	34.4612	0
802697	12.9476	0
802699	309.877	394.439
802700	96.3091	44.22
802701	8.34951	0
802703	6.48563	0
802704	7.14513	0
802705	113.443	94.6298
802706	55.5475	95.5485
802707	5.76718	66.33
802709	14.4466	0
802711	0.338498	0
802717	2886.08	886.332
802720	705.535	153.918
802722	257.991	72.5198
802724	23.8886	0
802726	30.372	0
802727	7.73007	0
802728	33.3056	22.11
802729	0.493879	0
802730	5.29498	11.055
802731	0	0
802733	72.163	36.2599
802734	8.48988	36.2599
802735	37.1864	0
802737	48.3418	254.279
802738	8.0304	94.6298
802740	31.952	0
802741	37.0888	0
802742	0.242938	0
802743	0.221043	0
802749	67.9363	73.4385
802750	92.9373	183.137
802751	1.3873	0
802756	204.499	22.11
802757	66.3929	0
802762	26.4182	0
802763	38.037	44.22
802764	23.3063	22.11
802767	116.064	182.218
802768	16.6218	0
802772	89.1566	0
802773	10.0677	0
802774	15.877	0
802775	21.3662	0
802779	2.21172	0
802780	91.7975	146.877
802782	0.225665	0
802783	51.6128	0
802784	1.1829	0
802785	62.8965	73.4385
802787	2.32326	80.4799
802789	0.667751	72.5198
802793	2.22842	0
802795	2.46042	0
802799	23.3082	110.158
802800	62.4474	44.22
802801	12.4272	0
802803	22.4846	0
802804	33.432	102.59
802805	110.911	22.11
802806	6.65106	0
802807	12.9089	0
802808	0.823132	0
802810	3.31191	0
802813	0.318616	0
802814	33.6676	95.0892
802815	113.421	154.378
802816	60.4356	146.877
802817	69.6728	0
802819	76.0447	0
802820	75.9156	22.11
802823	333.452	850.856
802825	84.4165	95.5485
802827	130.236	44.22
802828	158.438	116.74
802829	10.3884	0
802830	59.0823	0
802831	9.46849	0
802832	95.769	36.2599
802835	47.1428	0
802836	11.4189	0
802837	4.18047	0
802840	4.26547	58.8293
802843	34.3085	0
802844	36.4341	0
802845	15.7902	80.4799
802846	12.5355	0
802847	146.999	36.7193
802851	6.79739	0
802852	14.1174	0
802853	8.10846	22.11
802854	9.21748	22.11
802856	0.780583	0
802857	31.5691	0
802858	170.225	0
802859	1.91815	0
802860	30.138	0
802861	2.34175	36.2599
802862	29.1978	145.04
802863	5.10784	0
802864	14.0984	0
802867	1.03677	0
802868	62.5687	73.4385
802869	38.9622	0
802870	4.03305	0
802871	46.6065	0
802872	28.6464	167.15
802873	67.7404	66.33
802874	28.8832	0
802875	8.19503	22.11
802876	191.025	0
802878	28.0713	22.11
802879	51.7796	36.85
802880	1.07574	0
802884	1.19619	0
802885	4.68634	7.37
802887	0.393373	0
802891	53.5017	80.9393
802894	148.413	124.7
802895	61.4137	95.5485
802897	8.94131	0
802898	3.26976	0
802899	37.8749	0
802901	4.6997	0
802902	0.789828	0
802904	170.925	262.698
802906	85.414	138.85
802907	1.10984	0
802908	122.518	234.398
802910	2.82186	0
802911	40.6941	0
802912	2.86217	0
802913	11.7801	0
802917	0.606712	0
802918	37.748	0
802920	14.4544	22.11
802921	45.0615	108.78
802922	14.2752	0
802923	16.9778	0
802924	178.669	146.418
802926	385.671	719.249
802928	16.5022	0
802929	254.305	145.04
802934	1.16163	0
802935	3.91216	0
802936	7.54457	36.7193
802937	3.06954	22.11
802938	2.06429	36.2599
802939	185.617	187.117
802940	0.503124	0
802941	3.78918	36.2599
802942	1.88117	0
802943	93.9951	183.137
802944	50.9616	110.158
802946	16.9067	0
802947	14.2318	0
802948	2.93936	0
802950	1.13573	0
802951	0.112833	0
802952	8.3841	0
802954	31.4788	18.13
802955	0.169249	0
802956	105.536	54.3899
802957	6.09171	0
802958	18.8532	0
802959	11.5594	0
802961	1.93297	181.3
802964	0.0548755	0
802965	0.333875	0
802967	5.02886	0
802968	167.342	72.9792
802969	6.97076	0
802972	6.46366	0
802973	44.8687	22.11
802974	0.45133	0
802975	20.1367	0
802976	91.0644	72.5198
802981	82.299	167.839
802982	21.6091	95.3188
802983	0.112833	0
802984	0.780583	0
802985	0.329253	0
802993	2.84564	0
802994	8.28599	22.11
802995	26.9079	0
802996	2.16788	0
802998	0.112833	0
803000	76.0586	117.199
803002	69.958	22.11
803005	0.164626	0
803006	0.488361	0
803010	14.6747	0
803015	3.0257	0
803018	32.6811	40.24
803019	0.251562	0
803020	0.164626	0
803022	2.62726	0
803023	0	580.879
803024	0.112833	0
803025	0.112833	0
803026	0.338498	0
803027	186.282	0
803028	23.8281	0
803030	4.50844	22.11
803031	92.1226	80.4799
803032	122.638	44.22
803033	0.225665	0
803035	59.4744	0
803036	13.3045	0
803037	8.94826	22.11
803038	8.07228	0
803040	4.86442	22.11
803041	0.164626	0
803042	4.76771	0
803045	283.357	248.352
803046	13.11	33.165
803047	658.423	392.56
803048	3.72387	0
803049	74.7471	18.13
803050	91.6387	22.11
803052	0.606712	0
803053	31.8375	0
803056	27.4254	36.2599
803057	35.6212	88.44
803058	157.469	80.9393
803059	20.3957	124.7
803060	5.10729	22.11
803061	111.578	153
803063	22.6568	73.4385
803064	13.4992	0
803065	116.418	108.78
[truncated: 9,398 more rows]

## Sheet: uniquely mapped read data
Dataset S2-2. The expression patterns of Hpa Emoy2 genes with uniquely mapped read data.
Gene IDa	Emoy2 csb	Emoy2 1 dpib
800007	0.133185	0
800009	79.4331	0
800010	0.388785	0
800013	7.43801	0
800014	513.336	583.497
800018	195.87	261.274
800019	3.34775	26.1274
800020	383.71	416.688
800024	32.3933	52.2548
800025	69.4855	41.3257
800026	420.848	210.479
800027	54.3846	26.1274
800028	36.5125	41.3257
800029	11.4795	26.1274
800030	122.116	82.6515
800031	4.94549	0
800032	132.976	0
800033	0.399554	0
800034	20.8994	0
800035	75.742	134.906
800038	9.29703	0
800039	28.4759	0
800040	1.31031	0
800041	16.2332	26.1274
800043	3.85895	0
800045	35.2604	313.063
800046	51.2374	501.264
800047	3.07522	43.2507
800048	0.133185	0
800049	10.8239	0
800050	6.46664	0
800052	0.399554	0
800053	8.49272	86.5014
800054	45.0696	41.3257
800055	6.7433	0
800059	37.5221	0
800060	4.00135	0
800061	6.2744	82.6515
800062	63.3436	0
800063	83.04	292.711
800064	4.31971	82.6515
800065	6.00068	0
800066	106.644	43.2507
800069	0.799109	0
800070	177.753	328.882
800072	64.22	86.5014
800074	15.1357	0
800075	8.50408	0
800076	0.133185	0
800078	0.133185	0
800079	0.194392	0
800080	6.23211	0
800082	3.61873	0
800083	79.0342	243.266
800084	2.10942	0
800086	298.955	255.654
800087	24.0343	26.1274
800088	68.281	26.1274
800089	20.9608	0
800090	58.218	67.4531
800091	438.617	93.5805
800094	22.7981	26.1274
800096	17.3919	0
800097	15.3357	0
800098	30.3493	221.408
800101	0.133185	0
800104	110.657	26.1274
800107	144.436	0
800108	7.25546	0
800109	1.45995	0
800110	21.027	26.1274
800112	0.26637	0
800113	12.5729	0
800114	19.995	173.003
800115	27.2813	41.3257
800116	146.888	277.512
800117	51.2673	130.637
800118	163.523	173.888
800119	8.19344	95.5055
800120	17.0554	43.2507
800121	3.0094	0
800123	6.06817	26.1274
800124	6.93357	0
800125	228.317	26.1274
800127	0.860316	0
800128	978.394	883.287
800129	93.7448	295.055
800130	1.86519	0
800131	10.5483	0
800133	103.126	0
800137	90.0083	156.764
800138	39.6565	212.404
800139	43.3421	108.779
800141	161.211	69.3781
800142	2.29304	43.2507
800143	112.196	260.808
800144	192.331	67.4531
800145	50.2993	125.902
800146	307.44	78.3822
800147	3.12506	0
800148	102.562	0
800149	57.0293	167.228
800150	210.951	155.88
800151	30.4979	108.779
800152	90.1448	167.228
800154	1.62604	0
800157	3.11321	0
800160	57.0865	26.1274
800164	4.585	0
800165	123.272	0
800166	134.358	78.3822
800167	1.51547	0
800168	0.52197	0
800170	9.81948	0
800171	104.952	52.2548
800172	67.6195	0
800173	102.088	112.629
800174	132.086	119.708
800175	33.8942	43.2507
800176	8.54776	0
800177	2.4699	0
800178	1.05471	0
800179	25.8229	0
800180	152.472	130.637
800181	6.96648	0
800182	47.4185	119.708
800183	4.48473	0
800184	13.2768	0
800185	61.1798	0
800186	42.5219	26.1274
800187	68.9063	216.254
800189	6.26609	0
800190	73.9011	0
800191	16.1808	67.4531
800193	39.5677	145.835
800194	31.9743	0
800196	1.11592	26.1274
800197	137.132	52.2548
800198	1.05471	0
800200	0.788339	0
800201	24.922	26.1274
800202	97.3808	119.708
800204	142.542	108.779
800205	1.00996	0
800206	49.904	0
800208	29.3336	0
800209	47.1949	0
800210	8.32106	0
800211	0.133185	0
800212	75.8477	26.1274
800213	6.00588	0
800217	4.46319	0
800218	48.2714	93.5805
800219	5.24477	0
800220	46.7053	26.1274
800221	189.587	26.1274
800223	42.3075	0
800224	0.460762	0
800225	10.6964	0
800226	33.6294	41.3257
800228	88.8732	52.2548
800244	4.73464	0
800248	14.0992	0
800250	25.7566	0
800251	1.19866	41.3257
800252	86.6696	52.2548
800253	69.2221	41.3257
800255	103.107	43.2507
800256	53.769	173.003
800257	29.3689	0
800258	6.6821	26.1274
800259	58.7314	93.5805
800260	376.908	401.49
800261	161.923	260.389
800262	5.72767	41.3257
800264	35.6473	26.1274
800265	120.285	52.2548
800266	11.7011	0
800267	207.97	108.779
800268	5.54452	0
800270	8.64092	214.329
800271	2.31458	0
800272	18.4975	0
800273	25.0802	86.5014
800274	136.068	0
800281	82.8463	52.2548
800285	0.26637	0
800289	0.399554	0
800293	6.59121	0
800294	83.6945	26.1274
800295	49.8941	0
800298	40.0187	0
800299	97.6996	129.752
800300	2.91421	0
800301	3.01401	0
800302	2.29765	0
800303	32.9512	0
800305	11.8277	0
800307	0.727132	0
800309	13.3384	0
800311	2.89159	0
800312	3.4923	0
800314	123.693	129.752
800315	245.095	112.629
800316	10.2078	0
800317	49.129	26.1274
800319	23.8958	0
800321	12.6823	0
800322	47.2044	43.2507
800323	57.2773	0
800326	58.4997	208.134
800327	54.5127	93.5805
800328	216.205	123.977
800329	126.866	26.1274
800331	74.9302	0
800334	0.788339	0
800337	0.26637	0
800338	29.9591	0
800339	107.15	52.2548
800342	14.836	0
800343	94.832	108.779
800345	14.5044	0
800346	3.9128	0
800347	12.0225	0
800348	245.637	202.359
800349	88.9411	0
800351	0.727132	0
800354	0.194392	0
800356	0.583177	0
800357	777.995	638.561
800358	6.94434	0
800359	38.6271	0
800362	0.327577	0
800364	0.799109	0
800367	5.75644	0
800368	84.295	93.5805
800369	162.819	86.5014
800370	391.833	301.715
800377	39.0343	0
800391	8.88611	93.5805
800393	32.5786	0
800394	3.10292	0
800395	19.5064	41.3257
800396	486.281	426.577
800397	179.867	67.4531
800399	17.0512	0
800400	2.28227	0
800403	14.8541	82.6515
800415	0.194392	0
800417	0.26637	0
800421	0.388785	0
800436	103.513	52.2548
800437	1.32108	0
800439	38.0417	0
800440	5.56666	0
800441	0.194392	0
800442	3.03046	0
800449	2.40361	84.5765
800452	15.4804	0
800453	31.9212	26.1274
800454	14.4714	0
800455	1.32108	0
800456	22.9225	0
800459	172.054	26.1274
800461	21.2588	0
800462	32.1048	0
800463	257.905	574.493
800464	45.4377	26.1274
800465	23.3179	0
800467	1.39874	0
800469	3.90155	0
800470	13.389	0
800471	33.6157	82.6515
800472	39.8274	112.629
800473	1.69909	0
800477	95.3568	95.5055
800478	23.0985	41.3257
800483	42.2037	0
800484	77.7159	86.5014
800485	101.482	0
800486	109.354	26.1274
800495	78.5579	67.4531
800496	57.6861	0
800497	5.74059	0
800500	32.1517	0
800501	115.146	193.355
800503	792.78	2104.2
800505	19.8722	82.6515
800507	167.816	82.6515
800508	117.443	26.1274
800509	21.9237	86.5014
800510	81.1155	108.779
800511	77.0625	0
800514	0.133185	0
800520	120.834	26.1274
800523	1.17712	0
800525	149.156	425.692
800528	105.089	41.3257
800529	9.21476	41.3257
800531	12.4479	0
800532	152.78	255.654
800533	4.26772	0
800534	264.099	152.03
800537	1164.29	768.733
800538	38.8096	26.1274
800539	6.01713	26.1274
800548	10.2083	52.2548
800549	0.26637	0
800550	3.31945	0
800552	424.801	238.531
800553	3.76328	0
800554	5.451	0
800556	8.8538	0
800558	0.388785	0
800560	54.0611	26.1274
800561	1.91503	0
800564	1.97623	0
800565	69.7051	26.1274
800566	104.37	78.3822
800567	1.987	0
800568	34.3456	0
800569	13.8244	0
800570	54.1037	0
800571	12.2503	41.3257
800572	52.9797	52.2548
800574	420.418	335.962
800576	46.1031	0
800578	6.08342	0
800579	51.0007	123.977
800580	241.598	121.633
800581	2.41546	0
800582	90.2187	0
800584	0.727132	0
800585	1.31031	0
800586	21.7594	0
800589	8.05517	26.1274
800592	0.133185	0
800594	0.194392	0
800596	3.31885	0
800598	0.26637	0
800599	14.1926	26.1274
800600	52.2778	52.2548
800605	6.03311	0
800607	50.5674	0
800608	61.6869	119.708
800609	55.0327	67.4531
800611	1.94793	0
800612	16.7413	41.3257
800613	11.8077	0
800614	3.74114	41.3257
800615	3.03094	0
800616	0.133185	0
800617	12.9966	0
800618	4.29709	0
800619	8.03255	0
800620	1.83228	0
800622	6.96139	0
800623	0.583177	0
800624	11.696	0
800625	86.7237	41.3257
800626	0.399554	0
800627	452.981	753.069
800628	99.0682	41.3257
800629	486.494	264.658
800630	15.9427	0
800631	9.41328	0
800634	509.383	332.112
800635	586.877	26.1274
800636	0.194392	0
800638	33.5257	26.1274
800639	15.5704	0
800640	49.9771	26.1274
800641	8.16975	0
800642	35.5571	86.5014
800643	9.52696	0
800644	211.9	145.835
800645	0.399554	0
800646	31.2981	43.2507
800648	12.5228	78.3822
800649	86.2612	0
800650	0.910754	0
800651	1.65943	0
800653	113.062	297.865
800654	93.262	67.4531
800657	0.788339	0
800659	7.94412	0
800660	33.8415	26.1274
800663	0.399554	0
800664	1.13237	0
800665	49.2986	52.2548
800666	14.3588	0
800667	1.11592	0
800668	75.9588	86.5014
800671	10.8368	0
800672	29.5855	0
800673	12.632	0
800680	20.2501	0
800681	28.2065	26.1274
800682	114.205	78.3822
800683	138.943	110.704
800684	166.595	354.389
800685	32.4684	195.28
800686	85.7333	161.034
800687	14.6087	26.1274
800688	0.133185	0
800689	0.532739	0
800692	0.777569	0
800693	11.6734	43.2507
800694	2.50849	0
800696	739.712	995.915
800697	2.76457	0
800698	1.12669	0
800699	102.982	0
800700	13.2552	41.3257
800703	1.5047	0
800704	142.932	223.333
800707	28.1684	0
800708	0.777569	0
800709	145.546	26.1274
800710	200.713	161.034
800711	3.95707	0
800714	16.2152	0
800724	1.08762	0
800727	6.08247	0
800729	251.064	182.892
800730	121.206	43.2507
800731	3.14719	52.2548
800732	0.727132	26.1274
800735	52.9106	332.996
800738	13.3144	0
800739	0.26637	0
800742	15.0325	0
800743	86.128	82.6515
800746	85.1303	0
800750	49.7169	0
800752	36.0666	0
800753	1.92579	0
800754	19.8994	0
800755	13.9992	0
800757	219.771	108.779
800758	119.667	43.2507
800764	0.593947	0
800765	15.7487	41.3257
800766	5.06174	0
800767	1.32676	0
800768	11.1894	0
800769	220.586	429.542
800770	6.82665	0
800771	59.3762	0
800772	113.214	0
800775	12.2406	0
800777	46.3995	0
800778	83.5976	108.779
800779	162.405	104.51
800781	1.72015	0
800784	40.2332	0
800785	15.0551	0
800786	677.609	193.355
800790	21.6488	0
800791	106.639	86.5014
800792	85.2527	86.5014
800793	16.3129	0
800794	25.4624	26.1274
800795	92.6982	125.902
800796	25.4895	67.4531
800797	152.719	217.558
800802	328.82	26.1274
800803	0.910754	0
800806	7.29926	0
800808	1.10515	0
800810	1.77568	0
800812	11.8801	26.1274
800813	1.84305	0
800814	70.4177	119.708
800815	961.869	555.025
800816	166.392	110.704
800818	5.54512	0
800820	11.3026	123.977
800821	38.7326	0
800822	27.2941	43.2507
800823	38.7511	0
800825	8.62141	0
800826	0.133185	0
800828	79.4953	52.2548
800829	32.1445	26.1274
800830	106.327	78.3822
800832	88.8176	173.003
800833	0.327577	0
800837	4.01212	0
800838	3.32406	0
800839	52.2217	251.385
800840	177.561	78.3822
800841	4.21375	0
800842	128.053	41.3257
800843	0.399554	0
800845	20.5616	41.3257
800846	17.381	0
800848	0.327577	0
800850	61.8304	84.5765
800851	7.04414	0
800852	9.83192	0
800854	216.568	67.4531
800855	76.3928	0
800856	182.689	84.5765
800859	0.716362	0
800863	122.25	129.752
800864	2064.92	1418.8
800866	21.8641	52.2548
800867	0.388785	0
800868	7.30542	0
800870	0.860316	0
800871	76.0198	0
800872	136.808	332.112
800873	199.178	93.5805
800875	91.2444	26.1274
800876	5.78474	0
800877	15.9302	0
800878	28.8415	0
800879	88.6747	108.779
800880	111.036	348.195
800881	50.9453	0
800882	36.9862	127.827
800883	928.885	509.228
800884	3.34775	0
800885	47.8491	78.3822
800886	1.23833	41.3257
800888	253.267	187.161
800889	5.56157	0
800890	36.8222	26.1274
800891	18.4137	0
800893	38.0373	0
800895	6.80098	0
800896	234.969	182.007
800897	175.333	104.51
800898	41.3279	0
800901	0.26637	0
800903	112.614	52.2548
800904	11.3592	26.1274
800905	33.294	52.2548
800906	22.7595	43.2507
800909	23.028	41.3257
800910	93.7464	129.752
800911	127.431	219.483
800912	30.3173	0
800914	0.399554	0
800915	93.6704	67.4531
800916	17.902	86.5014
800917	0.910754	0
800918	50.8201	155.88
800920	227.593	134.906
800921	25.6162	0
800924	31.0395	52.2548
800925	25.1338	0
800928	173.413	123.977
800931	0.194392	0
800935	140.754	108.779
800938	165.835	108.779
800945	84.4748	0
800947	111.196	69.3781
800948	11.089	1556.2
800950	6.29439	0
800951	0.133185	0
800952	27.1549	0
800953	107.057	0
800954	6.56692	0
800956	485.312	457.594
800958	34.2313	0
800967	183.473	0
800968	36.0821	41.3257
800970	27.4034	41.3257
800971	15.0001	0
800972	310.529	0
800973	344.868	110.704
800974	1.39874	0
800978	537.093	1340.42
800979	60.9121	0
800983	5.3189	0
800989	0.194392	0
800990	114.644	150.105
800992	94.0786	0
800994	56.7939	41.3257
800995	67.6414	82.6515
800996	0.583177	0
800998	1.64866	78.3822
800999	9.9322	41.3257
801003	12.4787	0
801004	3550.44	2418.87
801006	17.613	0
801022	0.460762	0
801036	62.3319	134.906
801039	35.1991	129.752
801041	120.989	0
801042	9.19107	0
801043	39.5107	93.5805
801044	75.8829	78.3822
801045	398.81	283.707
801051	60.2515	0
801052	13.5566	0
801053	32.8819	52.2548
801054	92.3387	26.1274
801056	52.6333	173.003
801057	38.7491	0
801058	217.695	346.006
801060	12.2668	0
801062	5.86193	0
801064	159.502	0
801065	4.46367	0
801066	0.133185	0
801067	188.172	245.61
801068	294.801	69.3781
801069	30.8522	26.1274
801070	1543.81	1228.25
801072	104.063	82.6515
801073	133.688	397.22
801074	37.6774	0
801076	226.789	67.4531
801079	409.864	571.527
801080	43.1308	43.2507
801081	4.20651	0
801082	202.757	153.955
801084	341.184	506.884
801086	58.1583	136.831
801087	12.0252	0
801088	55.3119	112.629
801089	3.37497	0
801090	1.54838	0
801092	3.65732	0
801096	64.7837	173.003
801097	19.1065	0
801098	62.7503	293.13
801099	31.9116	0
801100	5.95251	0
801101	0.477216	0
801103	238.577	82.6515
801104	38.3514	41.3257
801105	33.0036	0
801108	7.93383	0
801110	1.2491	0
801111	114.017	346.006
801112	60.7247	0
801113	13.0501	0
801114	3.06953	0
801115	14.276	0
801116	23.9783	0
801117	13.6898	0
801119	16.7361	0
801120	656.079	446.665
801121	0.388785	0
801122	156.747	153.955
801123	18.5895	0
801124	113.937	41.3257
801127	8.27218	0
801130	0.133185	0
801134	1.04394	0
801136	1.2491	0
801137	2.40822	0
801139	163.156	225.258
801140	89.9548	0
801141	49.8498	129.752
801146	21.6287	0
801147	5.77858	0
801149	732.827	367.243
801151	153.521	238.531
801152	11.1997	0
801153	47.2032	26.1274
801154	412.526	690.351
801156	32.4739	52.2548
801157	5.26631	41.3257
801158	1.77107	0
801159	780.225	884.327
801160	31.406	43.2507
801163	1837.48	565.333
801166	3.1801	0
801167	27.6551	0
801168	39.0776	26.1274
801169	0.133185	0
801171	73.3803	0
801172	61.6921	0
801173	0.194392	0
801174	25.1822	0
801176	49.7132	69.3781
801177	3.80235	0
801182	27.1367	41.3257
801183	36.6606	82.6515
801184	8.00533	41.3257
801185	6.16276	0
801186	1.43272	0
801187	0.399554	0
801188	1.38229	0
801189	0.849547	0
801190	37.2424	78.3822
801193	19.7922	26.1274
801194	53.2003	0
801196	158.888	108.779
801197	2.17063	0
801198	0.26637	0
801200	11.9835	67.4531
801202	3.69639	0
801204	2.92558	26.1274
801205	1.96546	0
801206	12.5989	26.1274
801208	0.133185	0
801209	25.4044	26.1274
801210	24.6118	41.3257
801211	695.621	667.918
801212	191.985	354.389
801214	41.9904	0
801215	0	0
801217	1.17712	0
801220	7.13257	0
801221	0.399554	0
801224	25.3683	0
801225	64.136	0
801226	196.527	187.161
801227	4.368	0
801228	39.6448	78.3822
801229	32.2073	145.835
801231	0.388785	0
801232	57.7432	43.2507
801233	4.76803	0
801234	11.6456	41.3257
801237	140.977	108.779
801239	284.592	41.3257
801240	165.117	41.3257
801241	6.52785	0
801242	24.6132	127.827
801243	35.3059	0
801244	225.458	52.2548
801245	1.97623	0
801246	1.11592	0
801247	117.966	84.5765
801248	128.056	0
801250	51.5332	129.752
801251	82.0097	0
801252	1.31599	0
801253	11.1396	0
801255	26.1674	41.3257
801259	2.30381	0
801260	63.1053	41.3257
801261	69.7514	173.888
801262	36.1763	243.685
801263	270.111	93.5805
801264	28.2465	26.1274
801267	61.4474	41.3257
801268	90.3352	0
801269	87.3554	108.779
801270	214.11	127.827
801271	13.0403	0
801272	2.42622	0
801273	0.194392	0
801275	0.133185	0
801276	12.8788	41.3257
801277	90.4378	26.1274
801278	117.175	67.4531
801279	47.4264	0
801280	0.26637	0
801281	80.5023	268.508
801282	37.7246	26.1274
801283	188.288	0
801284	45.082	0
801285	11.5464	0
801287	3.54675	0
801289	6.50631	0
801290	296.504	689.046
801291	8.26033	0
801292	0.460762	0
801294	14.1547	26.1274
801296	6.02234	0
801298	1.22649	0
801302	5.78887	0
801303	0.133185	0
801304	396.921	150.105
801305	65.1915	67.4531
801306	65.9135	0
801307	2.00346	0
801312	0.194392	0
801313	7.2216	0
801315	1.29846	0
801316	1.98652	0
801317	2.44268	0
801319	3.74006	0
801321	121.23	108.779
801322	83.7127	43.2507
801323	115.189	134.906
801327	110.103	41.3257
801328	227.222	41.3257
801330	73.3094	161.034
801331	1.10515	0
801332	21.7311	0
801333	27.6355	0
801334	317.176	52.2548
801335	61.9143	82.6515
801336	348.83	221.408
801356	0.194392	0
801364	8.65372	69.3781
801366	53.9433	67.4531
801367	39.1389	86.5014
801368	168.598	0
801370	51.6015	52.2548
801374	30.158	41.3257
801375	40.6066	86.5014
801376	52.7037	67.4531
801377	157.409	52.2548
801380	4.79124	0
801381	708.926	210.479
801382	0.26637	0
801384	69.6003	0
801386	132.71	173.003
801387	41.2116	26.1274
801388	4.22913	0
801391	15.415	26.1274
801392	21.5653	26.1274
801394	93.0909	43.2507
801395	54.1924	0
801396	1.32108	0
801399	80.9413	86.5014
801402	0.194392	0
801407	14.7815	0
801408	23.9938	0
801410	1.10515	0
801411	167.947	41.3257
801412	81.3505	0
801414	1.9593	0
801415	3.95199	0
801416	0.26637	0
801417	20.5226	0
801420	193.266	266.583
801421	179.056	129.752
801426	176.548	43.2507
801427	1.43165	0
801429	13.8728	43.2507
801434	24.4109	0
801435	2.38656	0
801436	1.25987	0
801437	4.17313	0
801438	412.301	415.384
801439	10.9288	0
801440	40.937	150.105
801441	571.283	640.021
801443	29.4965	0
801449	1.47072	0
801450	15.2191	0
801451	27.3703	0
801453	307.596	295.055
801457	0.133185	0
801460	118.593	84.5765
801461	0.716362	0
801470	0.327577	26.1274
801471	13.9896	67.4531
801472	38.4677	26.1274
801473	19.4885	0
801475	290.612	52.2548
801477	1082.73	382.441
801478	206.991	152.03
801479	23.7186	67.4531
801480	124.339	108.779
801481	109.078	121.633
801482	6.68258	0
801483	50.9286	112.629
801484	87.0922	93.5805
801485	343.23	108.779
801486	4.73464	78.3822
801487	172.655	267.468
801488	26.6401	0
801489	121.524	127.827
801494	1.11592	0
801495	141.564	78.3822
801496	28.3936	26.1274
801497	15.4552	52.2548
801504	0.799109	0
801514	3.75807	0
801517	0.716362	0
801519	22.5903	0
801528	11.5238	0
801530	0.399554	0
801531	1.45995	0
801532	3.1086	0
801533	5.18003	26.1274
801534	2.81962	0
801537	0.460762	0
801539	485.053	517.813
801540	756.818	857.625
801541	32.7897	26.1274
801545	44.1315	0
801546	68.2901	0
801547	0.133185	0
801549	39.0513	314.988
801550	48.8426	0
801551	230.839	26.1274
801553	33.3894	0
801554	28.1704	67.4531
801555	208.779	41.3257
801556	32.9726	93.5805
801557	5.81041	0
801558	77.715	26.1274
801559	74.2322	0
801560	89.644	0
801562	2.4982	0
801563	49.0164	0
801564	85.3023	108.779
801566	107.117	136.831
801567	28.7499	26.1274
801568	16.0857	0
801570	50.1297	93.5805
801574	97.9636	0
801575	194.186	0
801577	20.4088	41.3257
801578	1.18789	0
801579	97.6801	0
801580	9.30271	0
801581	17.7723	165.303
801583	0.327577	0
801587	370.041	214.329
801588	0.788339	0
801589	0.399554	0
801594	126.176	43.2507
801595	130.512	67.4531
801596	3.6861	26.1274
801597	1.25987	0
801598	0.460762	0
801599	5.67675	0
801600	2.68075	0
801601	123.507	138.756
801602	13.1323	0
801603	98.4157	41.3257
801605	1.12669	0
801606	41.11	197.205
801607	4.90289	0
801608	2.29765	0
801609	122.354	345.385
801611	31.912	0
801612	1117.74	686.501
801613	35.1348	0
801614	2.86946	52.2548
801615	27.4176	41.3257
801617	20.9311	0
801621	265.926	385.251
801623	49.0761	41.3257
801624	128.606	0
801625	23.1117	0
801627	13.7936	67.4531
801628	17.4911	26.1274
801629	29.3089	0
801630	0.327577	0
801631	11.1714	0
801633	0.194392	0
801634	57.6466	67.4531
801635	86.6836	112.629
801636	24.5573	43.2507
801639	246.049	390.561
801644	4.72387	0
801646	64.8638	0
801647	233.678	320.763
801649	23.3771	0
801650	0.937978	0
801652	17.3816	0
801653	43.0042	86.5014
801654	36.363	0
801655	4.42352	0
801656	0.327577	0
801657	4.56239	0
801658	2.75841	0
801660	64.6641	110.704
801661	34.8201	82.6515
801663	8.35953	0
801665	0.327577	0
801666	0.971962	0
801667	14.06	43.2507
801668	7.37279	0
801669	0.593947	0
801671	485.592	810.478
801672	5.29167	0
801673	78.5685	0
801675	2.07603	0
801677	91.2183	150.105
801678	61.7785	84.5765
801679	6.03927	67.4531
801680	1.17712	0
801681	2.53051	0
801682	0.194392	0
801685	2.43652	0
801687	0.133185	0
801688	34.924	26.1274
801692	0.999185	0
801693	0.327577	0
801694	0.460762	0
801695	1.51547	0
801696	0.133185	0
801697	0.194392	0
801698	79.8151	67.4531
801700	111.175	43.2507
801703	73.071	152.03
801704	31.195	86.5014
801705	2.99187	0
801706	113.302	167.228
801710	2.02667	0
801713	3.80851	0
801714	1130.7	719.241
801715	96.0998	52.2548
801716	205.882	119.708
801718	42.9674	0
801719	0.399554	0
801721	17.7138	82.6515
801723	21.386	84.5765
801727	45.7927	273.662
801729	61.9405	43.2507
801730	3.60335	0
801731	0.665924	0
801735	1.05471	0
801738	108.962	0
801739	5.15681	0
801740	158.347	108.779
801741	85.6298	95.5055
801743	89.7812	0
801745	0.133185	0
801746	0.194392	0
801750	32.0053	0
801753	5.33936	82.6515
801754	0.194392	0
801755	22.5204	0
801756	6.18334	0
801757	288.81	680.306
801758	93.2853	67.4531
801759	2.54864	0
801766	213.835	0
801767	0.388785	0
801770	0.26637	0
801773	1.2491	0
801774	0.133185	0
801775	60.5217	26.1274
801776	62.7545	0
801777	17.7744	41.3257
801778	168.587	176.232
801779	1.98192	0
801780	12.5513	52.2548
801783	1.31031	0
801785	67.415	67.4531
801786	58.9591	0
801787	63.7007	67.4531
801788	61.4464	26.1274
801789	9.83701	41.3257
801791	5.24584	0
801793	2.03744	0
801794	93.8367	129.752
801795	114.135	93.5805
801796	2.10326	0
801797	0.194392	0
801798	36.8455	26.1274
801799	40.1845	82.6515
801800	3.83633	0
801801	21.8006	0
801802	7.7605	0
801806	89.8934	210.479
801807	40.3938	26.1274
801808	22.8984	0
801809	217.89	108.779
801810	3.75807	78.3822
801811	0.133185	0
801815	179.345	242.381
801816	19.4504	93.5805
801821	2.55833	0
801823	30.7319	0
801832	3.40788	26.1274
801834	2.51466	0
801835	17.4248	0
801837	19.0097	26.1274
801838	0.921524	0
801840	2.66429	0
801842	5.50037	0
801845	40.0934	162.959
801847	205.209	212.404
801850	14.3665	86.5014
801851	15.1112	41.3257
801853	17.94	0
801854	25.6042	0
801857	76.4324	26.1274
801858	3.67024	0
801860	2.41438	254.614
801861	83.006	84.5765
801862	1.38229	0
801866	12.722	0
801869	0.388785	0
801874	0.133185	0
801875	119.834	125.902
801876	110.265	78.3822
801877	711.41	689.73
801878	2.14233	0
801879	0.133185	0
801881	3.95247	0
801883	1.57668	0
801884	31.1424	0
801885	3.83005	0
801887	1.43165	0
801905	52.5338	134.906
801906	1.68725	0
801907	180.792	43.2507
801908	20.1816	0
801910	11.8518	84.5765
801912	157.346	67.4531
801913	38.9916	26.1274
801914	371.146	587.611
801915	45.2736	155.88
801917	17.6186	0
801918	56.4912	67.4531
801919	19.8221	0
801921	114.052	41.3257
801922	4.8786	0
801923	117.06	119.708
801924	159.056	108.779
801925	269.22	0
801926	24.2745	26.1274
801927	10.8351	0
801928	86.9669	93.5805
801931	7.49874	0
801934	161.779	125.902
801935	326.749	701.28
801937	3.48046	0
801938	10.7796	0
801940	80.3189	134.906
801941	53.1137	26.1274
801942	38.1868	0
801943	101.406	251.804
801949	42.6623	26.1274
801950	37.1182	26.1274
801951	86.7198	0
801952	64.528	26.1274
801953	16.0743	41.3257
801954	22.4984	26.1274
801955	4.91103	0
801962	125.985	67.4531
801963	16.9742	0
801968	159.673	145.835
801969	2.63139	0
801970	68.8943	26.1274
801971	8.36982	0
801972	31.7785	26.1274
801975	10.2524	69.3781
801978	4.64729	41.3257
801979	5.57342	0
801980	4.66883	0
801981	16.2676	0
801987	9.57938	67.4531
801989	189.123	251.804
801990	11.043	0
801991	5.46746	0
801992	113.35	67.4531
801993	7.94412	0
801994	707.533	1029.96
801995	322.029	82.6515
801996	39.4864	0
801998	6.96031	26.1274
801999	0.993501	0
802003	11.8406	0
802004	37.0211	43.2507
802005	5.66125	0
802006	124.677	130.637
802007	17.2693	0
802008	149.304	108.779
802010	41.2987	0
802011	13.7356	0
802014	93.6325	134.906
802015	6.37714	0
802016	11.4409	0
802017	42.3713	0
802018	25.2591	0
802019	0.52197	0
802020	0.655154	0
802022	30.0202	26.1274
802023	75.5591	0
802027	17.958	26.1274
802028	164.203	525.467
802031	7.87155	0
802032	73.7008	82.6515
802033	5.83255	0
802034	81.3544	191.011
802035	152.069	69.3781
802036	60.3911	41.3257
802037	1017.92	531.242
802038	1179.87	637.676
802039	47.6804	0
802040	186.567	259.504
802041	92.81	82.6515
802042	260.122	456.554
802045	219.46	108.779
802046	95.0297	26.1274
802047	126.46	127.827
802051	102.22	262.733
802052	124.171	127.827
802057	140.076	112.629
802058	8.21558	0
802059	18.3355	67.4531
802061	62.773	82.6515
802062	54.1054	0
802064	259.889	0
802065	111.312	176.232
802070	251.954	152.03
802071	2.62523	0
802073	11.8169	0
802074	5.42378	0
802075	1.03209	0
802076	64.7096	78.3822
802077	37.0289	26.1274
802079	33.4297	0
802083	40.6117	0
802084	6.27746	0
802085	5.71169	0
802086	1.19866	26.1274
802087	43.6869	0
802088	1.57668	0
802089	84.6942	26.1274
802090	31.1058	0
802091	3.93093	0
802092	17.6561	86.5014
802093	733.401	505.114
802094	154.034	294.636
802095	0.327577	0
802096	0.133185	0
802097	29.1886	129.752
802098	11.929	0
802099	36.9001	0
802100	29.0046	26.1274
802102	416.751	411.534
802103	1.38229	0
802104	18.2239	0
802105	30.2767	0
802106	22.6786	0
802107	9.12585	0
802108	12.7224	41.3257
802111	0.655154	0
802113	33.994	0
802115	17.0729	0
802116	59.2443	41.3257
802117	92.8276	136.831
802120	1.38229	0
802121	0.194392	0
802122	18.0438	0
802130	22.9784	0
802132	83.7327	52.2548
802133	5.63355	0
802136	5.73844	0
802137	9.06249	0
802139	1.70986	0
802140	17.1692	0
802141	138.349	52.2548
802144	25.6136	0
802145	128.079	43.2507
802148	99.9583	69.3781
802149	211.635	167.228
802150	16.7408	0
802151	96.0576	41.3257
802152	222.511	208.134
802153	167.274	0
802154	2.1151	0
802156	59.5792	0
802157	7.0652	0
802158	11.5211	0
802161	15.9716	26.1274
802163	0.133185	0
802164	17.8706	26.1274
802165	24.3542	41.3257
802166	24.6617	41.3257
802168	99.6403	152.03
802169	5.91129	0
802172	40.8342	0
802173	5.98787	0
802174	27.3677	0
802175	28.3475	43.2507
802176	70.3386	123.977
802177	435.997	407.684
802178	184.72	93.5805
802179	360.291	176.232
802180	54.3793	0
802181	209.31	242.381
802182	9.28118	0
802183	60.6889	112.629
802184	39.7764	0
802185	4.4246	0
802188	92.3908	95.5055
802192	0.460762	0
802193	0.133185	0
802195	75.9073	129.752
802196	75.1448	0
802197	108.053	317.798
802198	1.98192	0
802199	57.5467	26.1274
802200	31.5198	108.779
802201	59.7357	134.906
802202	90.2564	104.51
802203	4.14638	0
802205	377.901	93.5805
802207	0.583177	0
802210	48.6746	0
802211	137.34	257.579
802212	66.4889	78.3822
802214	1.38229	0
802215	17.8449	0
802216	0.194392	0
802217	2.68182	0
802218	180.262	26.1274
802220	0.194392	0
802221	0.932294	0
802223	73.5785	127.827
802228	1.38229	0
802230	38.0377	0
802231	6.10047	52.2548
802233	58.4714	119.708
802234	31.546	0
802235	6.34471	43.2507
802236	16.1406	26.1274
802238	14.5984	123.977
802239	46.0738	52.2548
802240	11.5617	0
802241	12.0785	41.3257
802242	4.17408	0
802243	132.911	41.3257
802244	33.3962	0
802245	51.8073	0
802248	111.863	41.3257
802249	671.491	334.037
802250	89.5046	41.3257
802254	0.727132	0
802256	0.133185	0
802257	7.48336	0
802258	1.04394	0
802261	6.89958	0
802262	22.5487	0
802267	7.90493	0
802268	0.388785	0
802273	0.133185	0
802276	5.37795	0
802280	0.133185	26.1274
802281	1.05471	0
802290	42.5559	0
802300	66.8503	41.3257
802302	3.52982	0
802303	71.9019	127.827
802304	173.957	291.671
802305	6.54275	0
802306	49.525	67.4531
802307	2026.55	1284.31
802308	11.6848	0
802309	3.19302	0
802310	40.0491	264.658
802312	20.1977	0
802314	1.7603	0
802315	28.8301	0
802316	22.5122	93.5805
802318	90.5347	0
802319	45.5741	41.3257
802322	4.15715	26.1274
802326	0.399554	0
802327	0.194392	0
802328	0.532739	0
802329	15.0222	0
802330	44.1351	136.831
802331	66.4347	167.228
802332	33.0331	69.3781
802333	6.7819	0
802339	21.2334	0
802340	0.665924	0
802342	105.044	82.6515
802344	43.6868	0
802345	107.344	26.1274
802351	17.4895	0
802352	30.6727	0
802354	20.6207	0
802358	3.21456	0
802359	235.448	26.1274
802360	43.0244	0
802361	2.07711	0
802362	79.6113	41.3257
802363	228.067	1155.02
802364	3.55704	0
802365	104.956	0
802366	146.854	210.479
802367	0.194392	0
802368	157.191	652.875
802369	527.222	549.669
802370	144.111	119.708
802371	3.69639	0
802372	31.6837	0
802373	33.2501	86.5014
802375	6.39359	0
802376	3.68101	0
802377	5.09465	0
802378	0.133185	0
802381	16.1371	26.1274
802382	30.36	0
802384	3.8188	0
802385	0.716362	0
802386	8.31597	0
802387	3.35804	0
802388	1.35967	0
802389	16.6349	52.2548
802390	52.6769	0
802391	101.277	119.708
802393	46.9753	41.3257
802394	396.938	241.341
802395	811.915	514.538
802396	80.4522	108.779
802397	6.41621	0
802399	0.727132	0
802400	23.8935	0
802403	8.18943	0
802404	1.12669	0
802405	51.8329	82.6515
802407	68.7856	52.2548
802408	0.910754	0
802409	18.5798	0
802412	1.79261	0
802415	0.194392	0
802416	4.00751	0
802417	18.7557	0
802418	20.6276	0
802419	1.64866	0
802420	328.404	693.781
802421	0.194392	0
802424	38.7522	41.3257
802428	69.5346	41.3257
802431	66.728	236.606
802436	1508.63	430.846
802438	33.969	26.1274
802442	13.8368	41.3257
802445	68.3145	86.5014
802446	1.74845	0
802447	173.1	138.756
802448	9.00697	0
802449	376.166	515.003
802450	32.0313	129.752
802452	4.34017	150.105
802456	39.2479	26.1274
802457	1488.75	610.664
802458	39.9285	0
802459	3.60796	0
802462	52.1041	136.831
802465	54.6678	93.5805
802466	1.4764	0
802467	6.72733	26.1274
802468	0.327577	0
802470	20.2552	0
802471	1.98652	0
802472	23.6686	43.2507
802473	125.248	182.007
802475	571.998	453.744
802476	58.3094	155.88
802477	95.3776	41.3257
802478	54.5383	84.5765
802479	78.3541	150.105
802480	1.12669	0
802481	7.99857	0
802484	2.09865	26.1274
802485	0.921524	0
802486	10.5715	0
802487	5.42223	0
802488	22.612	0
802491	56.219	0
802492	1.06039	43.2507
802493	196.464	253.729
802494	37.0231	0
802495	78.3052	41.3257
802496	150.329	0
802498	32.4437	0
802501	0.52197	0
802502	11.377	78.3822
802503	83.9425	52.2548
802504	37.5833	0
802505	50.1708	43.2507
802506	15.5122	0
802510	5.47314	0
802511	10.6572	0
802512	3.9849	0
802513	0.133185	0
802514	71.6323	0
802515	19.9476	0
802517	0.788339	0
802518	221.599	213.288
802520	42.3708	93.5805
802522	4.4852	0
802523	17.7483	0
802524	140.805	26.1274
802528	3.74683	0
802529	15.3606	0
802532	19.712	41.3257
802533	51.0557	67.4531
802538	514.266	356.314
802540	6.98801	0
802542	19.2112	0
802543	30.8696	0
802544	149.821	26.1274
802545	55.5454	0
802546	28.9752	26.1274
802549	35.2888	93.5805
802550	145.659	108.779
802553	89.5754	67.4531
802554	36.7125	123.977
802555	149.063	182.007
802556	0.982732	0
802558	91.4422	0
802559	25.2867	0
802560	24.1838	0
802561	35.3771	0
802563	248.643	382.441
802564	16.5228	0
802565	6.47694	0
802566	33.6712	0
802567	83.3496	41.3257
802568	39.2935	41.3257
802569	5.11727	0
802571	1.52624	0
802573	59.8752	52.2548
802574	17.1007	82.6515
802575	212.102	216.254
802578	120.75	93.5805
802579	5.68907	26.1274
802580	18.4495	82.6515
802581	1.19866	0
802582	17.3806	0
802586	5.06222	0
802587	130.791	69.3781
802588	129.124	26.1274
802590	82.3122	26.1274
802592	115.689	176.232
802594	60.6413	26.1274
802595	2.86898	82.6515
802596	30.4804	210.479
802597	88.7215	0
802598	5.702	67.4531
802599	60.7736	180.082
802600	181.411	78.3822
802602	2.27551	43.2507
802605	535.247	542.171
802606	22.1948	67.4531
802608	58.5238	0
802609	208.603	82.6515
802610	5.69123	0
802611	24.999	0
802615	85.7935	43.2507
802616	44.7132	0
802617	5.54003	0
802618	9.91928	41.3257
802621	0.716362	0
802623	0.655154	0
802624	0.133185	0
802627	17.3182	0
802629	0.399554	26.1274
802630	0.344031	0
802631	2.44268	0
802633	82.0093	67.4531
802635	39.543	43.2507
802636	87.7607	69.3781
802637	130.399	112.629
802638	62.7443	0
802639	477.577	242.381
802640	80.413	52.2548
802641	18.663	0
802644	31.0456	43.2507
802645	214.012	193.355
802647	8.05822	0
802648	37.9571	41.3257
802649	23.1504	0
802650	18.4301	26.1274
802651	122.038	67.4531
802652	1.31031	0
802653	2.2426	0
802654	27.9575	0
802656	99.4759	26.1274
802657	522.746	667.452
802658	75.8523	78.3822
802662	39.8647	52.2548
802663	22.7641	0
802665	57.2489	129.752
802666	121.929	52.2548
802667	16.9528	26.1274
802680	95.2601	26.1274
802681	84.5115	123.977
802686	0.532739	0
802691	42.0201	41.3257
802692	133.176	341.535
802693	3.55291	0
802694	21.2533	26.1274
802695	153.74	180.082
802696	40.5894	0
802697	15.2659	0
802699	364.239	456.974
802700	112.897	52.2548
802701	9.80207	0
802703	7.59746	0
802704	8.40381	0
802705	133.436	108.779
802706	65.3973	112.629
802707	6.76484	78.3822
802709	17.02	0
802711	0.399554	0
802717	3391.56	1035.32
802720	829.353	180.082
802722	303.386	82.6515
802724	28.1278	0
802726	26.6435	0
802728	39.166	26.1274
802729	0.583177	0
802730	0.133185	0
802731	0	0
802733	84.8582	41.3257
802734	9.99125	41.3257
802735	43.8023	0
802737	56.8623	291.205
802738	9.46468	108.779
802740	37.5204	0
802741	43.6399	0
802742	0.133185	0
802743	0.194392	0
802749	79.881	86.5014
802750	109.306	214.329
802751	1.63789	0
802756	240.439	26.1274
802757	77.9952	0
802762	31.0632	0
802763	44.7767	52.2548
802764	27.3929	26.1274
802767	136.569	210.479
802768	19.5326	0
802772	104.486	0
802773	11.3781	0
802774	18.4275	0
802775	25.1456	0
802779	2.60309	0
802780	107.941	173.003
802782	0.26637	0
802783	60.7195	0
802784	0.388785	0
802785	72.9463	86.5014
802787	2.74303	93.5805
802789	0.788339	82.6515
802793	0.821247	0
802795	2.75841	0
802799	27.4623	129.752
802800	73.349	52.2548
802801	14.6555	0
802803	26.4024	0
802804	39.3123	119.708
802805	130.276	26.1274
802806	7.84432	0
802807	15.1297	0
802808	0.971962	0
802810	2.24212	0
802813	0.327577	0
802814	39.188	110.704
802815	133.3	182.007
802816	70.9183	173.003
802817	81.9106	0
802819	89.3224	0
802820	89.2016	26.1274
802823	392.177	995.76
802825	99.2849	112.629
802827	153.189	52.2548
802828	186.104	134.906
802829	12.2288	0
802830	69.5691	0
802831	11.135	0
802832	110.122	41.3257
802835	55.495	0
802836	13.4219	0
802837	4.92335	0
802840	5.03607	69.3781
802843	40.3031	0
802844	42.9356	0
802845	18.6024	93.5805
802846	14.7328	0
802847	172.897	43.2507
802851	7.99348	0
802852	16.6312	0
802853	3.56368	26.1274
802854	10.8465	26.1274
802856	0.921524	0
802857	37.1483	0
802858	199.814	0
802859	2.26414	0
802860	35.4549	0
802861	2.76457	41.3257
802862	19.6411	165.303
802863	1.77107	0
802864	14.816	0
802867	0.665924	0
802868	73.735	86.5014
802869	45.8197	0
802870	4.75726	0
802871	54.8496	0
802872	33.6512	191.43
802873	79.7045	78.3822
802874	33.9768	0
802875	9.65907	26.1274
802876	224.578	0
802878	28.1896	26.1274
802879	1.31031	0
802880	0.399554	0
802891	62.9818	95.5055
802894	174.573	145.835
802895	72.0933	112.629
802897	10.5121	0
802898	3.85219	0
802899	44.5806	0
802901	5.52867	0
802902	0.932294	0
802904	193.416	304.059
802906	97.7318	161.034
802907	1.31031	0
802908	144.119	273.662
802910	0.52197	0
802911	47.9525	0
802912	3.37497	0
802913	11.1113	0
802917	0.716362	0
802918	44.4818	0
802920	16.0296	26.1274
802921	53.0061	123.977
802922	16.825	0
802923	19.925	0
802924	210.223	171.078
802926	453.433	844.926
802928	19.387	0
802929	298.34	165.303
802934	1.37152	0
802935	4.61839	0
802936	8.88718	43.2507
802937	3.59611	26.1274
802938	2.43699	41.3257
802939	206.578	199.13
802940	0.593947	0
802941	4.43381	41.3257
802942	2.22106	0
802943	110.443	214.329
802944	60.0424	129.752
802946	2.89728	0
802947	8.42026	0
802950	0.133185	0
802951	0.133185	0
802952	9.83498	0
802954	0.460762	0
802955	0.133185	0
802956	91.189	41.3257
802958	14.9636	0
802959	13.5874	0
802961	2.28227	206.629
802965	0.194392	0
802967	5.9293	0
802968	196.655	84.5765
802969	1.07685	0
802972	1.03209	0
802973	52.6914	26.1274
802974	0.532739	0
802975	23.7015	0
802976	107.001	82.6515
802981	71.3768	82.6515
802983	0.133185	0
802984	0.921524	0
802985	0.388785	0
802993	2.06419	0
802994	5.68447	0
802995	31.6204	0
802996	2.55941	0
802998	0.133185	0
803000	89.459	136.831
803002	82.2794	26.1274
803005	0.194392	0
803010	14.6693	0
803015	3.35804	0
803018	21.3537	0
803022	3.09783	0
803023	0	440.89
803024	0.133185	0
803025	0.133185	0
803026	0.399554	0
803027	218.8	0
803028	27.9847	0
803030	5.3189	26.1274
803031	108.171	93.5805
803032	144.17	52.2548
803033	0.26637	0
803035	69.8984	0
803036	15.6988	0
803037	10.5009	26.1274
803050	2.62062	0
803052	0.716362	0
803053	37.4414	0
803056	32.2917	41.3257
803057	41.856	104.51
803058	184.503	95.5055
803059	24.0076	145.835
803060	6.00588	26.1274
803061	131.216	176.232
803063	26.6617	86.5014
803064	15.8702	0
803065	136.956	123.977
803066	328.382	358.239
803067	132.225	369.168
803068	9.95218	0
803069	7.14286	0
803070	295.537	169.153
803072	18.1716	0
803073	43.5408	41.3257
803074	28.0769	26.1274
803081	13.6898	26.1274
803082	292.573	52.2548
803115	0.194392	0
803154	2.31458	0
803169	6.65583	0
803170	39.1129	129.752
803173	662.345	474.097
803174	38.2708	0
803175	19.6545	0
803176	22.8016	41.3257
803177	118.307	322.067
803178	135.504	26.1274
803179	13.695	26.1274
803183	0.716362	0
803184	128.893	41.3257
803185	1.6039	0
803186	46.96	78.3822
803190	2.1151	0
803191	0.133185	0
803192	3.36881	0
803199	0.133185	0
803201	1.55514	0
803202	103.995	193.355
803204	41.6125	0
803205	8.76184	0
803206	0.799109	0
803207	58.7535	0
803208	111.893	69.3781
803209	84.7236	0
803215	4.96194	0
803217	88.0695	26.1274
803220	11.9872	0
803221	0.194392	0
803225	7.35526	26.1274
803226	62.6296	108.779
803227	0.727132	0
803229	4.96763	0
803231	291.809	187.161
803232	46.7262	26.1274
803233	1.08762	0
803234	5.72354	0
803235	29.5456	123.977
803236	9.97432	0
803237	82.6019	0
803241	84.8647	0
803242	119.448	171.078
803243	51.8854	82.6515
803248	0.133185	0
803250	0.194392	0
803256	0.538423	0
803258	58.318	216.254
803259	3.82389	0
803260	7.53164	41.3257
803261	29.6942	0
803262	0.982732	0
803263	445.862	638.981
803264	58.7979	0
803265	13.1529	0
803266	61.8792	127.827
803267	19.2282	0
803268	24.0066	0
803269	2.03128	0
803270	1.92639	0
803273	144.461	309.834
803274	100.727	110.704
803275	84.0655	26.1274
803279	79.9813	0
803280	1.77107	0
803282	14.9825	82.6515
803283	30.0114	43.2507
803284	32.1882	26.1274
803285	1.42088	0
803286	15.4774	0
803287	77.0025	0
803290	61.3149	0
803293	17.5528	0
803294	27.0612	0
803296	35.8812	0
803297	6.21212	0
803299	44.9478	41.3257
803300	0.788339	0
803301	0.26637	0
803303	6.02174	0
803304	2.73011	0
803306	10.1852	0
803307	17.4248	0
803308	6.01264	0
803310	12.7966	41.3257
803311	4.34077	0
803313	16.0645	0
803314	371.831	127.827
803315	5.54727	0
803317	1314.02	1080.91
803319	29.6082	52.2548
803320	2.75225	0
803321	242.931	43.2507
803322	9.99293	0
803324	4.89565	0
803325	200.257	249.879
803327	7.16655	0
803328	89.386	67.4531
803331	47.3859	26.1274
803333	0.399554	0
803334	18.3395	0
803335	19.9956	0
803336	0.777569	0
803337	3.7905	0
803338	47.648	0
803339	10.778	0
803340	67.0718	0
803341	23.9803	67.4531
803342	62.1788	206.209
803343	3.71284	0
803346	55.4799	41.3257
803348	0.665924	0
803350	11.3406	0
803351	7.10642	0
803354	70.8019	224.218
803356	23.0038	86.5014
803357	31.6286	0
803358	0.194392	0
803359	5.27414	41.3257
803361	70.347	93.5805
803363	143.324	41.3257
803364	56.2102	0
803365	143.654	0
803366	0.133185	0
803367	2.79748	0
803368	1.21003	0
803369	0.849547	0
803370	30.3936	67.4531
803371	42.7903	41.3257
803372	7.8314	0
803374	12.7095	26.1274
803375	3.68562	0
803376	26.803	162.959
803377	0.532739	0
803378	87.6479	155.88
803379	93.2949	41.3257
803380	747.232	859.503
803381	0.133185	0
803382	3.43002	26.1274
803383	16.2399	0
803391	37.6377	153.955
803400	23.2295	26.1274
803402	0.133185	0
803406	0.665924	0
803407	28.2744	0
803408	19.943	0
803409	82.4291	26.1274
803414	92.9283	84.5765
803416	0.460762	0
803417	0.133185	0
803419	123.189	156.764
803420	13.6337	0
803422	273.541	134.906
803424	2.7538	26.1274
803425	14.8252	52.2548
803428	6.3273	0
803430	22.3923	0
803431	80.8976	41.3257
803432	182.192	307.909
803434	18.6954	26.1274
803436	1.7603	0
803437	48.485	0
803438	78.6388	334.037
803439	60.6956	104.51
803440	479.654	522.238
803441	10.6402	0
803442	108.586	125.902
803446	5.24477	0
803452	35.4177	0
803455	61.1918	0
803456	40.7961	52.2548
803457	0.133185	0
803458	1.31031	0
803459	185.865	352.464
803460	51.5301	67.4531
803461	69.6845	67.4531
803462	4.23481	0
803463	296.078	173.003
803466	14.9034	82.6515
803467	21.2161	41.3257
803468	26.7757	0
803469	111.647	287.401
803470	6.44451	0
803471	9.90019	0
803472	4.79124	0
803478	9.69138	0
803479	12.4947	0
803480	169.594	93.5805
803482	15.428	0
803483	16.156	0
803486	7.48288	134.906
803487	2.63139	0
803489	44.0385	255.654
803490	78.2415	26.1274
[truncated: 7,918 more rows]
