# Supplementary material for: Expression Profiling during Arabidopsis/Downy Mildew Interaction Reveals a Highly-Expressed Effector That Attenuates Responses to Salicylic Acid
Source: PubMed Central journal article supplement (PMC4199768; doi:10.1371/journal.ppat.1004443), 2014-10-16

Figure S3

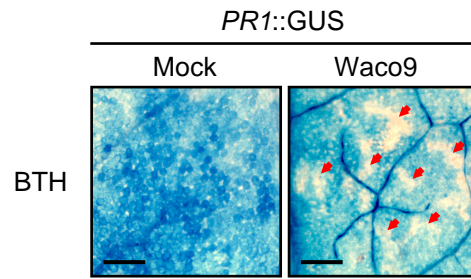

Supplement: ppat.1004443.s006.pdf [file ppat.1004443.s006.pdf]
