# Supplementary material for: Expression Profiling during Arabidopsis/Downy Mildew Interaction Reveals a Highly-Expressed Effector That Attenuates Responses to Salicylic Acid
Source: PLOS journal article supplement (doi:10.1371/journal.ppat.1004443), 2014-10-16

Figure S2

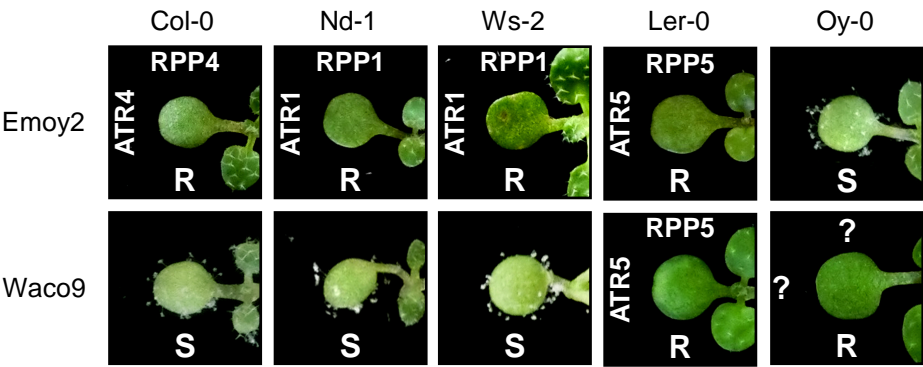

Supplement: S5 (10.1371/journal.ppat.1004443.s005) [file journal.ppat.1004443.s005]
