# Supplementary material for: Expression Profiling during Arabidopsis/Downy Mildew Interaction Reveals a Highly-Expressed Effector That Attenuates Responses to Salicylic Acid
Source: PLoS Pathog. 2014 Oct 16;10(10):e1004443. doi: 10.1371/journal.ppat.1004443 (PMC4199768; doi:10.1371/journal.ppat.1004443)
Supplement: Table S6 — The expression patterns of Arabidopsis genes differentially expressed after inoculation with Hpa Emoy2 and Waco9. (XLSX) [file ppat.1004443.s013.xlsx]

## Sheet: Sheet1
Table S6. The expression patterns of Arabidopsis genes differentially expressed after inoculation with Hpa Emoy2 and Waco9.
	Relative expression (compared to mock)b							FDRc
AGI IDa	Emoy2 1 dpi	Emoy2 3 dpi	Emoy2 5 dpi	Waco9 1 dpi	Waco9 3 dpi	Waco9 5 dpi		Emoy2 1 dpi	Emoy2 3 dpi	Emoy2 5 dpi	Waco9 1 dpi	Waco9 3 dpi	Waco9 5 dpi
AT1G01010	0.630563	0.381865	1.24244	0.0668401	0.877927	2.09669		1	1	0.423653	1	0.409325	1.90352e-05
AT1G01190	0.216955	-0.427888	-0.134812	-0.0547298	-0.507408	-1.5761		1	1	1	1	0.77004	0.000949737
AT1G01340	0.552833	1.8656	0.995198	0.13736	2.70973	2.2449		1	0.00235983	0.826583	1	2.58392e-08	1.53806e-07
AT1G01680	2.82731	2.38249	1.32171	0.480744	3.47795	4.38078		0.000650019	6.22361e-05	0.4867	1	3.93441e-11	4.5974e-15
AT1G02220	2.09094	1.34573	0.992155	0.910317	2.01742	3.83056		0.271263	0.584033	1	1	0.00117067	5.29555e-11
AT1G02230	3.63136	1.31737	0.333941	1.69667	2.45029	1.82275		6.54032e-05	0.309532	1	1	1.07054e-06	0.00181871
AT1G02360	-0.0359566	0.992136	0.850935	-0.325334	1.69891	2.18966		1	0.574496	1	1	0.00224499	4.58175e-06
AT1G02390	0.0617838	-0.0200314	0.344612	-1.04291	1.0689	3.38266		1	1	1	1	0.526207	6.5102e-12
AT1G02450	2.63588	0.360386	0.667616	1.04891	1.52214	2.27505		8.44779e-05	1	1	1	0.0141459	4.94473e-07
AT1G02470	0.230242	0.447894	0.343209	-0.0425041	0.927332	3.10115		1	1	1	1	0.466544	1.05019e-06
AT1G02580	0	1.36175	0.82056	0	0	4.41151		-	1	1	-	-	1.55416e-06
AT1G02850	2.03984	1.31374	0.171534	0.301558	3.15994	2.31559		0.0828451	0.206969	1	1	3.92567e-11	1.36334e-05
AT1G02920	1.90819	1.98819	1.06853	1.42356	3.29313	2.52146		4.16332e-05	1.59798e-09	0.452197	0.026396	3.00114e-28	8.80194e-11
AT1G02930	2.24517	2.06647	1.12901	1.44144	3.31177	2.52558		1.67232e-05	9.8184e-10	0.266249	0.0479435	1.65974e-28	2.37162e-10
AT1G03290	0.81539	0.999162	0.606709	0.361082	1.73725	1.58571		0.648132	0.0975369	1	1	1.30914e-06	1.80943e-06
AT1G03660	0.807942	0.951386	-0.344458	0.473885	1.68825	3.10155		1	0.895473	1	1	0.0267936	3.15485e-08
AT1G03850	2.21572	1.98291	0.93486	1.82109	2.3022	3.07817		0.00294246	0.0886186	0.762686	0.988206	0.00960726	1.6017e-13
AT1G03870	-0.912542	-0.738957	0.187367	-0.137668	-1.54362	-0.860668		0.991878	0.724916	1	1	3.48099e-05	0.178853
AT1G04980	1.37849	1.21534	0.911609	0.43553	1.77291	1.98325		0.0208328	0.0223828	0.870465	1	4.87412e-06	5.69729e-06
AT1G05000	0.522356	0.595972	0.697116	0.615487	0.603102	3.40975		1	1	1	1	0.80453	3.55726e-14
AT1G05340	-0.307599	1.24473	0.714128	0.396839	1.19553	4.20133		1	0.354391	1	1	0.250277	7.54112e-18
AT1G05570	0.988251	1.20007	1.0634	0.350875	1.39199	1.94261		0.123703	0.0141102	0.245802	1	0.000440009	1.78518e-09
AT1G05880	0.307704	2.3349	1.09026	0	1.65907	3.92361		1	0.130502	1	-	0.535434	2.76624e-11
AT1G07000	1.0927	1.28636	0.4797	0.80988	1.87876	1.49428		0.475691	0.0207876	1	1	3.37029e-06	0.000631586
AT1G07620	1.97611	1.68509	0.739275	0.0841044	2.33323	2.41007		0.119876	0.00894709	1	1	9.19751e-05	1.58172e-05
AT1G07870	0.229566	0.447842	0.783195	0.0844753	0.380094	2.20295		1	1	1	1	0.913932	2.48314e-05
AT1G07900	0.53589	1.05819	1.14901	-0.00624603	1.98719	2.88382		1	0.760151	1	1	0.00130068	2.79919e-09
AT1G08050	0.805018	1.36009	1.15155	0.0958465	1.95719	2.81963		1	0.0738527	0.870465	1	0.000178477	2.48135e-09
AT1G08310	0.220342	0.495156	-0.0825462	0.149592	2.21745	2.83371		1	1	1	1	0.00417138	3.04643e-06
AT1G08450	1.39502	1.56035	1.25299	0.449928	1.81391	2.06079		0.00321235	9.47214e-05	0.065089	1	1.00069e-06	4.37961e-08
AT1G08860	-1.3739	1.16914	0.47268	-0.979876	0	4.2035		1	1	1	1	-	1.62285e-09
AT1G08940	0.434329	0.443073	0.776809	0.166119	1.30632	1.8767		1	1	1	1	0.0952811	0.000160872
AT1G09070	-0.288201	0.473684	0.405076	-0.161726	0.463713	1.22298		1	1	1	1	0.553637	0.000522662
AT1G09080	0.578481	2.30433	1.31459	-0.0883822	2.56865	2.46191		1	0.000265255	0.442011	1	7.77149e-07	2.06951e-06
AT1G09350	-1.90209	-1.04141	-0.340324	-0.573605	-2.59769	-3.2301		0.0981145	0.436716	1	1	0.000376063	1.08203e-08
AT1G09500	-0.479617	0.0263005	-1.18194	-0.0192328	-0.0468717	2.44456		1	1	1	1	1	1.17076e-05
AT1G09560	0.641732	1.04254	0.763063	0.243159	1.4912	2.11239		0.876295	0.111483	0.732416	1	0.000306368	1.21597e-10
AT1G09740	0.345594	0.19115	0.0439179	0.152865	0.624089	1.46831		1	1	1	1	0.619021	0.000205109
AT1G09930	-0.93255	0	0	-1.0652	3.22303	3.75753		1	-	-	1	0.0040806	3.16964e-05
AT1G09932	2.09728	2.08034	1.52209	0.703018	3.3355	3.71865		0.00777163	2.05959e-06	0.0337205	1	8.20693e-21	1.64188e-23
AT1G09935	0	1.01739	0	0	1.303	3.49171		-	1	-	-	0.785794	0.000547119
AT1G09970	0.260949	0.845074	0.306451	-0.0291192	1.60372	1.05026		1	0.454659	1	1	0.000164296	0.0611626
AT1G10070	0.239007	1.30937	0.702177	-0.0165061	2.71616	2.35977		1	0.0868041	1	1	2.38921e-08	9.48663e-06
AT1G10340	2.17016	2.03559	1.30926	0.737716	2.7667	2.80087		0.0208552	3.63122e-05	0.150449	1	6.48898e-11	1.256e-13
AT1G11330	1.99898	0.734141	0.313598	1.01974	1.23014	0.929991		4.26453e-06	0.564075	1	1	0.00443224	0.0393342
AT1G11740	-1.26885	-1.65905	0.435293	0.355184	-1.28367	-2.52293		0.657214	0.0260241	1	1	0.143264	0.000210155
AT1G12290	0.601123	1.71939	0.796272	-0.600104	1.78051	2.37491		1	0.0342108	1	1	0.00866779	0.000350488
AT1G12900	-0.129958	-0.271565	-0.265201	-0.0139212	-0.492657	-1.22847		1	1	1	1	0.589334	0.000924273
AT1G13310	0	1.92935	0.0592197	0	0	4.11791		-	0.92302	1	-	-	1.56741e-12
AT1G13340	1.3652	1.86806	0.899654	0.294202	2.65356	3.5819		0.55303	0.000456009	1	1	1.9105e-08	3.97238e-12
AT1G13470	3.56561	2.53693	1.38125	1.19706	3.18224	2.5517		6.45823e-09	3.17087e-09	0.0145534	1	5.78054e-12	2.84996e-15
AT1G13480	0	0	1.32401	0	0	3.49864		-	-	1	-	-	4.96145e-05
AT1G13520	0	0.71588	1.45328	0	-0.175517	4.84781		-	1	1	-	1	8.64841e-13
AT1G13530	0	1.41375	1.91762	0	0	2.84264		-	1	0.593896	-	-	9.05289e-05
AT1G13650	-0.60514	-0.990251	-0.601478	-0.373399	-1.81561	-2.26919		1	0.928454	1	1	0.00702958	0.000326644
AT1G13750	1.27548	1.12399	0.733507	0.272359	1.58508	1.20364		0.00945603	0.0327809	1	1	2.07395e-05	0.00251253
AT1G13830	0.338282	1.73538	0.730644	-0.137536	2.14682	2.65351		1	0.37305	1	1	0.0347621	2.99043e-06
AT1G13990	0.665202	1.11918	0.587299	0.705358	2.07438	1.8489		1	0.110417	1	1	8.15134e-07	0.000778314
AT1G14360	0.839173	0.786541	0.542135	0.222767	1.30485	1.34536		0.488863	0.35137	1	1	0.000532502	0.00270642
AT1G14370	0.265631	1.19345	0.717665	0.0292664	1.47311	2.0927		1	0.021995	1	1	0.000100667	3.15639e-08
AT1G14540	0.0682224	2.05824	1.83447	0.57876	1.86532	4.37243		1	0.217396	0.826583	1	0.21994	3.09129e-08
AT1G14870	0.929226	1.76214	1.19922	0.738648	3.06763	3.95578		1	0.00226617	0.940132	1	1.36368e-10	1.23389e-11
AT1G14880	4.17879	2.36996	1.63753	1.45255	3.04911	3.37468		1.82316e-11	0.000121133	0.00314263	1	3.52414e-07	1.09754e-17
AT1G15010	-0.869485	0.199472	0.167129	-0.650609	1.05599	3.34518		1	1	1	1	0.525352	4.59111e-09
AT1G15520	1.05403	2.88432	1.08879	0.492503	4.21997	3.7803		1	3.71866e-05	0.64755	1	7.11571e-13	1.73793e-12
AT1G15670	0.0329002	0.236124	0.895664	0.179193	1.43561	1.67436		1	1	1	1	0.00506111	0.00067102
AT1G15790	2.35802	0.745148	0.777183	1.03263	1.67093	2.06377		0.000245031	1	1	1	0.00114819	1.21879e-08
AT1G16420	-0.566127	1.98782	0.0303143	-0.522968	3.1158	1.51183		1	0.0267818	1	1	1.11553e-07	0.0806911
AT1G16670	1.12533	0.443149	0.43482	0.448133	1.01616	1.51284		0.111588	1	1	1	0.053159	0.000917227
AT1G17020	-0.328275	-0.124529	0.127829	0.0959498	0.145372	3.17448		1	1	1	1	1	1.80361e-07
AT1G17610	0.690234	1.43076	0.0111229	0.77919	1.87972	0.788109		1	0.0364492	1	1	0.000171695	0.274493
AT1G17615	0	1.56706	1.14244	0	0	3.96783		-	1	1	-	-	2.54613e-06
AT1G17745	1.31828	0.973019	0.690347	0.376985	2.21002	2.63053		0.367334	0.153438	1	1	5.96645e-12	7.23914e-08
AT1G17860	0.353015	0.496447	0.218174	0.0842379	0.745467	1.75939		1	1	1	1	0.386336	5.001e-05
AT1G18360	-0.109531	-0.225589	-0.399278	-0.114312	-0.291852	-1.31306		1	1	1	1	0.89331	0.000359893
AT1G18570	0.607825	1.58586	0.667801	0.811367	2.38534	1.52215		1	0.00235983	1	1	1.6706e-09	0.00134924
AT1G18860	0	0	1.10437	0	0	3.69615		-	-	1	-	-	4.4755e-06
AT1G18890	0.0130893	0.938522	0.504338	0.103023	0.990354	1.78046		1	0.483666	1	1	0.141726	4.17138e-07
AT1G19020	0.287896	1.34893	0.358645	0.619671	2.27168	1.86239		1	0.0101416	1	1	5.27274e-09	9.52516e-06
AT1G19250	3.2183	3.37704	0.43288	0.243885	5.33401	4.20827		0.00255694	1.2915e-07	1	1	4.75334e-27	1.79874e-14
AT1G19960	2.2489	0.551456	-0.0523434	1.12191	1.03611	0.539839		1.00624e-08	1	1	0.280212	0.041539	0.505689
AT1G21120	1.17802	2.27997	0.172711	1.26837	3.03754	0.151676		0.579223	2.66344e-05	1	1	4.40657e-12	0.99254
AT1G21240	3.00068	2.11371	1.5432	1.21445	3.0105	3.39498		6.28394e-06	0.00549169	0.0421163	1	1.53849e-06	2.15974e-16
AT1G21250	3.20593	1.33355	0.742224	1.58491	2.13716	1.88623		1.09006e-09	0.00560767	1	0.109012	2.80147e-08	7.13535e-08
AT1G21310	0.879429	2.40719	1.58269	0.415022	2.97023	3.55543		1	6.56785e-09	0.00200022	1	8.5934e-14	1.54825e-18
AT1G21390	0.150811	0.63733	0.192014	0.0644673	1.22371	1.63994		1	1	1	1	0.0452995	0.000152749
AT1G21400	0.747334	0.784661	0.392024	0.715786	1.49919	1.6981		1	0.594195	1	1	0.000542599	9.51367e-05
AT1G21520	1.54866	1.19801	0.993608	0.793983	1.40895	2.18102		0.00129113	0.0482352	0.234457	1	0.00110525	1.78305e-08
AT1G21525	2.19336	1.92705	0.981746	0.360836	2.50639	4.46764		0.0346498	0.0223502	1	1	0.000427065	9.31768e-22
AT1G21550	-0.066773	0.447662	0.623628	0.166863	1.16518	2.40988		1	1	1	1	0.193803	1.43871e-06
AT1G21750	0.885745	1.01946	0.859071	0.192066	1.32023	1.80258		1	0.757595	1	1	0.156795	0.000930005
AT1G22180	0.270838	0.268308	0.592623	-0.159222	0.798559	1.62964		1	1	1	1	0.257219	2.08281e-05
AT1G22400	-0.655227	0.334541	-0.0284732	-0.454338	0.782761	1.68278		1	1	1	1	0.199793	0.000168124
AT1G22530	-0.91257	-0.765751	-0.303176	-0.294933	-1.3745	-0.942908		0.824867	0.604206	1	1	0.000665859	0.126487
AT1G22740	-0.659394	-0.195085	-0.543385	0.0644537	-1.07936	-1.82358		1	1	1	1	0.052243	0.000273321
AT1G22930	0.260974	0.791506	0.35853	0.32829	1.24607	1.59695		1	0.396976	1	1	0.00140448	8.54554e-05
AT1G22990	0	1.35552	0	0	0	3.49191		-	1	-	-	-	0.000235877
AT1G23040	0.138191	0.306978	0.311588	0.0316215	0.111104	1.72342		1	1	1	1	1	0.000917227
AT1G23140	0.329135	0.284186	0.831961	0.0588452	0.860596	1.83745		1	1	1	1	0.280558	3.10949e-05
AT1G23840	0.764268	1.45228	1.03172	-0.328913	2.29747	1.83444		1	0.0982254	0.913921	1	2.06362e-05	0.000485071
AT1G24140	1.14518	1.93528	1.15637	0.404345	2.67838	2.77783		1	0.0250612	0.718042	1	9.71146e-06	4.1637e-09
AT1G24145	1.87474	1.62878	0.875752	1.5345	2.72586	2.62006		0.0157333	0.00770331	0.826583	0.391858	6.64917e-09	1.83146e-13
AT1G24147	2.3936	1.22246	0.608432	1.16746	2.07323	1.62678		5.10917e-06	0.140137	1	1	3.02692e-05	0.000333232
AT1G24150	0.366307	1.25873	0.774299	-0.386315	1.47274	1.84374		1	0.217396	1	1	0.00839266	2.81855e-05
AT1G25220	0.358723	0.754742	0.243118	0.257024	1.37303	0.805955		1	0.423031	1	1	0.000285408	0.122623
AT1G26380	1.46286	2.86385	1.27293	1.58257	3.48498	2.17862		0.489289	4.38688e-09	0.207338	0.933992	1.01748e-15	9.83108e-06
AT1G26390	1.30596	5.07364	2.13016	0.440573	5.74697	6.30473		0.931317	4.12343e-18	0.00549678	1	6.19147e-28	9.22949e-27
AT1G26400	-0.911572	1.67045	1.06333	0	0.927104	4.73403		1	0.872058	1	-	0.909004	6.31951e-12
AT1G26410	-0.32708	1.90354	1.74962	-0.410272	1.65428	4.34239		1	0.170179	0.141164	1	0.159388	9.65469e-18
AT1G26420	1.43461	2.1096	1.46981	0.900397	2.68266	2.85371		0.409957	0.000291245	0.135434	1	2.1423e-08	5.35249e-10
AT1G26690	1.18456	0.644433	0.464616	0.760712	1.19554	1.34155		0.12522	0.792761	1	1	0.00299991	0.000138711
AT1G27730	0.208082	1.07349	-0.262758	0.0997305	1.72756	0.701566		1	0.258316	1	1	0.000339977	0.573965
AT1G27770	0.270948	0.984238	0.748198	-0.0634817	1.46034	1.45411		1	0.163986	1	1	0.000510862	0.00133917
AT1G27980	0.552476	0.719233	0.239841	0.295117	1.8539	1.42737		1	1	1	1	9.3978e-05	0.000659593
AT1G28580	0.0522586	0.493279	0.570901	0.174513	0.507927	1.24362		1	1	1	1	0.563078	0.000725342
AT1G29240	0.407815	0.745661	0.61083	-0.218375	1.27171	1.87337		1	0.823875	1	1	0.0137764	1.5273e-06
AT1G29290	-0.0563209	0.66949	0.857472	0.641483	2.54991	2.72854		1	1	1	1	0.000134559	1.21081e-05
AT1G29395	-0.757432	-0.477083	-0.184347	-0.0697983	-1.02773	-1.5594		1	1	1	1	0.108439	2.76105e-06
AT1G29640	0.153735	0.734091	0.369261	-0.760536	0.792384	3.0959		1	1	1	1	0.925643	1.92223e-06
AT1G30040	-0.205345	0.417857	0.608981	-0.378157	0.880269	3.37758		1	1	1	1	0.416955	3.26313e-09
AT1G30270	-0.44593	0.592391	0.477604	-0.197648	0.513061	1.62561		1	1	1	1	0.704629	0.0006119
AT1G30640	0.0623896	0.590851	0.553768	-0.163709	1.07044	1.55444		1	1	1	1	0.049953	0.000332058
AT1G30700	-1.31836	0.0407016	1.09208	-0.372764	1.73987	3.05893		1	1	1	1	0.144755	3.89431e-05
AT1G30850	0	1.01921	0.419266	0	1.68562	2.93749		-	1	1	-	0.230073	0.000509819
AT1G30900	1.61825	1.58893	1.69999	0.310546	2.12453	3.2915		0.120055	0.000432234	0.00358957	1	4.05177e-06	2.40374e-19
AT1G31130	0.2893	0.684955	0.290537	0.295514	1.01142	1.47099		1	0.545263	1	1	0.00668566	0.000120417
AT1G31580	2.11269	1.29127	0.66342	1.16377	1.46007	1.35701		1.6342e-11	0.00814889	1	0.0435565	0.000172243	1.97209e-05
AT1G32350	-1.57095	2.48952	0.627946	-1.8101	2.95044	3.6752		1	0.0571922	1	1	0.00422404	5.04074e-10
AT1G32700	0.681617	0.500771	0.348459	0.759053	1.0897	1.36622		1	0.996181	1	1	0.00692358	0.000536997
AT1G32940	0.737719	1.31021	0.730874	-0.0639256	1.84466	2.93836		1	0.0326352	1	1	0.000593131	5.29555e-11
AT1G32960	1.33675	2.04357	1.09622	0	3.18237	3.74888		1	0.00894709	1	-	4.65256e-08	9.25579e-11
AT1G33030	-0.979698	1.89438	1.08665	-0.527811	3.57885	2.89672		1	0.0612267	1	1	1.23401e-08	3.78667e-05
AT1G33560	0.171057	0.983856	0.664092	0.0494393	1.39376	1.93333		1	0.298739	1	1	0.00412352	1.34884e-05
AT1G33720	0.805684	1.40477	1.3539	-0.0459997	2.09579	2.47387		1	0.179861	0.073998	1	0.000509982	1.78638e-10
AT1G33730	0.299474	1.37743	1.51212	0	3.11785	4.03539		1	1	1	-	0.000943345	7.54634e-11
AT1G33840	-0.0679908	2.0362	2.11059	0	1.46189	2.97306		1	0.337826	0.527452	-	0.593395	0.000569807
AT1G33950	1.73355	2.46933	1.91747	0	2.66253	5.26585		1	0.068416	0.0671851	-	0.00891166	5.48294e-22
AT1G33960	3.41278	1.88285	1.55743	0.778816	2.74569	4.07292		9.5174e-07	0.127665	0.00348786	1	0.000510759	1.35367e-25
AT1G34180	0	2.57737	1.57044	0	2.82916	2.70221		-	0.0140083	0.424572	-	0.00461758	1.50855e-05
AT1G34420	1.91548	1.33336	0.757333	0.975849	1.94855	2.01566		0.0434424	0.483666	1	1	0.0119116	6.82555e-07
AT1G34750	1.27458	0.784065	0.595591	0.514222	1.14811	1.41388		0.106987	0.620366	1	1	0.0186803	0.000117241
AT1G35210	1.09246	1.76773	1.06627	0.941744	2.4052	2.21698		1	0.0821092	0.859616	1	7.629e-05	5.79539e-07
AT1G35230	1.70731	2.24483	1.56133	0.68455	2.83285	3.36707		0.0268658	0.0344096	0.00549678	1	0.00106155	6.43222e-16
AT1G35710	2.63487	2.03353	1.26842	1.19405	2.3979	2.39799		1.94177e-09	3.92459e-05	0.0421163	0.598994	3.98167e-07	2.15974e-14
AT1G36622	0.184266	2.01307	0.815304	0.308129	1.74632	2.23046		1	0.000543127	1	1	0.00281628	1.49976e-06
AT1G43910	1.51789	1.04597	0.965064	0.0898084	1.97641	2.7111		0.42857	0.472649	1	1	0.00101846	1.74065e-11
AT1G44120	0.432146	-0.025041	0.796544	0	0.581572	3.01494		1	1	1	-	1	0.000122361
AT1G44130	0.12516	2.13518	1.01262	-0.592796	2.81173	3.86133		1	0.0219106	1	1	9.95351e-05	3.34226e-14
AT1G45145	1.20143	1.24957	0.665348	0.0778829	2.16873	2.76257		0.307517	0.103596	1	1	3.73652e-07	8.39627e-16
AT1G47890	0.206708	1.64017	1.80968	-0.78793	1.59762	3.63317		1	0.209693	0.258523	1	0.119032	6.21779e-11
AT1G48000	-0.770549	0	0.469314	0	1.53554	3.07063		1	-	1	-	0.622575	0.000195773
AT1G48210	1.16379	0.975922	0.663455	0.534755	1.48698	1.40974		0.0642364	0.216913	1	1	0.000330077	0.000260276
AT1G48320	0.704018	1.1622	0.677809	0.637252	1.94998	2.02329		1	0.0315859	1	1	2.67791e-07	3.21816e-07
AT1G49050	0.853681	1.11752	0.871239	0.343441	1.5914	1.95126		0.954166	0.135692	0.660034	1	0.00028691	9.85318e-07
AT1G49750	1.29608	0.570248	0.311082	0.528817	0.605624	0.329115		0.000568165	0.872058	1	1	0.326747	0.60831
AT1G50740	0.950259	0.734264	0.1481	0.321888	1.42018	1.3476		0.356851	0.594195	1	1	0.00028691	0.000321714
AT1G51660	0.830844	0.881668	0.460481	0.444959	1.24553	1.57344		1	0.229024	1	1	0.00153717	0.000307007
AT1G51760	0.555308	0.708388	0.0754899	0.155197	1.66481	1.41887		1	0.958865	1	1	2.14596e-05	0.000350152
AT1G51790	1.83355	1.39971	0.417928	0.973072	1.67779	0.846839		0.272998	0.199998	1	1	0.000747491	0.169862
AT1G51800	1.2119	1.31348	1.06431	0.79314	1.70142	2.28852		0.510555	0.25463	1	1	0.0141459	0.000117191
AT1G51860	0	2.37267	3.3547	0	3.15358	5.063		-	0.0084349	3.60442e-05	-	2.25185e-06	1.00689e-18
AT1G51890	1.07741	2.29546	1.51992	0.992852	2.73688	3.41244		1	0.00138832	0.00256486	1	8.78241e-06	7.9718e-19
AT1G52510	-0.109296	-0.306815	-0.229176	0.0106641	-0.351503	-1.22518		1	1	1	1	0.801257	0.00096818
AT1G52770	1.0221	0.921371	0.505063	0.403886	1.69131	0.768255		0.704937	0.672315	1	1	0.000289836	0.287906
AT1G52855	-0.00731129	-0.0918601	0.426551	0.095764	-0.0562004	2.1165		1	1	1	1	1	0.000123424
AT1G52890	-0.153039	1.85999	0.363195	-0.178177	1.61253	3.10495		1	0.330309	1	1	0.0300947	4.24579e-08
AT1G53100	-0.56375	0.77775	0.574506	-0.747783	1.13141	2.11377		1	1	1	1	0.606634	2.90786e-05
AT1G53620	-1.25668	0.783557	1.51306	0	1.83867	4.41602		1	1	1	-	0.1418	2.57637e-09
AT1G53625	0.93534	2.08001	0.95129	0.66481	2.17023	3.56541		1	0.00149442	0.973363	1	0.000514521	2.13879e-10
AT1G53830	0.109338	0.225826	-0.603941	-0.0813521	1.586	3.22404		1	1	1	1	0.183351	2.00925e-06
AT1G54575	0.738561	0.173307	0.293052	-0.0550576	0.797525	1.66618		1	1	1	1	0.377522	1.02454e-05
AT1G55210	0.53612	0.580732	0.39172	0.0475972	0.722926	1.46822		1	0.94512	1	1	0.382602	5.46101e-05
AT1G55265	0.591121	0.72458	0.711924	0.238508	0.803048	1.71618		1	0.906212	0.963521	1	0.338337	6.32178e-06
AT1G55330	-0.812205	-0.976342	-0.334435	-0.17491	-1.48292	-1.08822		0.389715	0.103596	1	1	3.99136e-05	0.0034418
AT1G55610	-0.738643	-0.279936	-0.266265	-1.63239	0.327174	1.92714		1	1	1	0.933992	0.997285	0.000711058
AT1G55790	0.440938	1.0911	0.935172	0	0.747227	4.83606		1	1	1	-	0.911718	5.98499e-18
AT1G55910	1.58673	0.605788	0.42374	0.556272	1.14397	1.47302		0.000345018	0.94197	1	1	0.00645452	1.45937e-05
AT1G56060	0.305313	1.27119	1.00539	0.159404	1.36795	2.88011		1	0.0557273	0.342222	1	0.0105278	1.0867e-12
AT1G56120	1.01015	1.79738	1.06657	-0.32351	2.28954	1.98486		0.532421	0.00019744	0.4867	1	4.89818e-09	2.93976e-06
AT1G56550	0.536253	1.7301	0.882672	0.105399	2.26063	2.52413		1	0.115653	1	1	0.0019143	1.06723e-08
AT1G56600	-0.751055	1.51402	0.775434	-0.770407	3.06498	2.43025		1	0.857351	1	1	0.000103936	3.31547e-05
AT1G56660	0.271594	0.660655	0.802974	0.0305857	1.20333	1.75364		1	1	1	1	0.0172138	6.2904e-05
AT1G57560	0.591345	1.26555	0.783136	-0.218253	1.85727	2.47169		1	0.279289	1	1	0.00103585	1.36727e-07
AT1G57630	2.29105	2.27429	1.27037	0.796696	3.0712	3.16311		0.0258073	0.0116438	0.197335	1	9.82126e-06	7.13838e-16
AT1G57650	-0.0771229	0	0.322043	0	3.18081	2.44752		1	-	1	-	0.00300318	0.000946406
AT1G58225	1.64512	2.46062	2.36344	1.6419	2.61327	3.35508		0.245103	1.90387e-07	1.12954e-06	0.598994	1.03745e-06	3.32717e-18
AT1G58340	0.55032	-0.115999	1.06215	0.41233	0.414016	2.65086		1	1	1	1	0.971285	8.24804e-05
AT1G58420	0.639258	1.70294	1.35305	0.853234	1.92295	2.20964		1	0.168515	0.440028	1	0.224377	5.06959e-05
AT1G59710	0.650213	0.62074	0.702238	0.377022	1.02003	1.51695		1	0.857351	1	1	0.0287173	3.78213e-05
AT1G59950	-0.517367	1.36513	-1.16265	-1.04069	3.83884	0.542672		1	1	1	1	0.00021296	0.878895
AT1G60730	-0.174849	1.1168	0.178364	-0.429369	2.28493	2.2419		1	0.183057	1	1	7.54019e-08	8.52359e-09
AT1G60830	0.550707	1.11409	1.09776	0.441813	0.395515	2.96747		1	0.931436	1	1	0.98673	1.1119e-07
AT1G60890	0.528434	0.326113	0.917967	-0.149222	0.666677	1.56807		1	1	0.710971	1	0.510261	0.00043905
AT1G61080	0	0	0	0	0	3.94447		-	-	-	-	-	4.8807e-06
AT1G61140	0.475336	0.35968	0.393065	-0.0382173	0.828509	1.4578		1	1	1	1	0.14456	5.54141e-05
AT1G61250	0.716045	0.902962	0.711715	0.310462	1.28163	1.65649		0.488979	0.120597	0.936578	1	0.000172165	7.55922e-07
AT1G61420	1.05989	0.90216	1.58376	0.646323	1.17134	2.67081		0.832177	0.857351	0.044366	1	0.164978	1.86404e-08
AT1G61560	0.646168	0.388839	0.612559	0.689232	1.25963	2.09292		1	1	1	1	0.0403434	9.68173e-06
AT1G61800	2.74229	1.92063	1.05498	0.236225	2.57945	3.41479		0.0981145	0.000395298	1	1	1.41129e-09	2.88753e-08
AT1G61820	-0.894068	-0.235743	-0.28436	-0.773569	0.150665	3.40867		1	1	1	1	1	7.46153e-09
AT1G62300	-0.493634	0.70265	0.527656	-0.314203	1.49992	1.92331		1	0.874726	1	1	0.000335055	1.26848e-05
AT1G62510	-1.60707	-0.920276	-0.722854	-0.272011	-1.73572	-1.43698		0.0106443	0.457135	1	1	0.000520235	0.0291821
AT1G62840	0.509007	1.38351	0.58117	0.0904813	1.34714	1.78001		1	0.122542	1	1	0.103398	0.000202611
AT1G62935	-0.763836	1.37944	-0.0383114	-0.39921	0.859377	2.49665		1	0.900663	1	1	0.824545	5.19452e-05
AT1G63245	0.0976179	0.490277	0.63446	-0.568326	0.928399	4.13593		1	1	1	1	0.687086	6.80289e-11
AT1G63530	-0.121558	0.754634	0.221945	-0.26224	0.226139	2.55879		1	1	1	1	1	5.16944e-05
AT1G63720	-0.179309	0.585624	0.177259	0.522981	0.819357	2.34117		1	1	1	1	0.515868	3.19459e-09
AT1G63750	-0.722631	0.188613	0.946256	-0.700449	0.217067	2.01982		1	1	1	1	0.997285	0.000348269
AT1G63840	-0.381957	0.875292	0.180733	-0.522735	1.55226	2.27487		1	0.447054	1	1	0.00109556	2.69018e-10
AT1G64065	-1.34769	1.29731	0.811695	-1.28873	1.73908	2.41744		0.653085	0.686716	1	1	0.0512939	1.9887e-05
AT1G64970	0.26056	0.383349	0.348006	0.172855	0.725367	1.59263		1	1	1	1	0.22841	0.000962424
AT1G65040	0.990536	0.926443	0.424842	0.340161	1.37947	1.35591		0.239901	0.132801	1	1	6.19059e-05	0.00210144
AT1G65240	-0.190859	0.761697	0.577642	0.00957538	1.29949	1.8863		1	0.92302	1	1	0.0255681	4.12432e-06
AT1G65310	-0.623112	-1.57581	-0.535632	-0.097786	-1.81348	-2.19361		1	0.0658697	1	1	0.00711299	0.000584897
AT1G65390	-1.2203	-1.06354	-0.728162	-0.528455	-0.630991	-2.78526		0.727836	0.69144	1	1	0.824545	0.00014427
AT1G65483	0.537836	2.31423	2.26978	0	2.26095	5.03896		1	0.011785	0.042377	-	0.00587965	3.05528e-17
AT1G65486	1.47135	1.02415	0.433788	0.962477	1.30818	1.41284		0.0940193	0.332142	1	1	0.0192097	0.000501456
AT1G65490	1.61598	0.569735	0.28073	0.817866	1.35147	1.80923		0.00761488	1	1	1	0.00842771	4.74198e-06
AT1G65500	1.18321	1.68312	0.926288	0.343773	2.34896	2.81071		0.0891433	8.91343e-05	0.666522	1	7.72667e-10	3.42119e-14
AT1G65510	-0.258984	1.32702	0.361705	0.620525	1.05388	2.27189		1	0.935662	1	1	0.597872	3.6807e-05
AT1G65610	-0.569347	0.257839	0.496262	0.23256	0.438159	2.84258		1	1	1	1	0.936752	1.5968e-07
AT1G65690	1.27711	2.13351	1.26441	1.465	2.60404	3.72652		0.891158	0.00358326	0.137283	1	5.40449e-05	3.2217e-17
AT1G65790	1.50123	1.57532	0.644144	0.402749	1.73932	1.44567		0.0630591	0.0119631	1	1	0.000943345	0.000505105
AT1G65845	0.116409	0.971156	0.848196	0.0514317	1.0242	1.5603		1	0.167546	0.596418	1	0.0137907	6.37009e-05
AT1G66090	1.53663	1.30118	0.585581	1.72369	2.04528	2.97224		0.486638	0.319641	1	0.761884	0.000683791	1.12877e-10
AT1G66700	0.311867	3.52896	1.28462	0.687903	4.93736	3.17594		1	4.68497e-05	0.544022	1	3.60291e-15	2.46269e-07
AT1G66725	0.40249	0.505757	0.806688	-0.175544	1.54062	2.58054		1	1	1	1	0.0241678	3.18795e-07
AT1G66880	1.52794	1.7564	0.870404	0.597423	2.25864	2.16391		0.0139201	7.82031e-06	0.386544	1	7.43446e-12	4.23918e-10
AT1G66920	1.04722	1.17902	0.477383	0.917391	1.37177	1.6506		0.844397	0.529304	1	1	0.114775	0.000535637
AT1G66960	1.58333	3.37716	2.42233	0	3.78317	3.98357		1	1.66578e-06	0.00250184	-	2.58881e-07	1.96258e-12
AT1G66970	1.36052	0.938432	0.461309	0.712977	1.06302	0.582629		0.000169569	0.103953	1	1	0.00564601	0.202107
AT1G67000	0.373208	2.50266	1.29478	-0.277585	3.13411	2.24348		1	0.0137186	0.962108	1	2.02483e-05	0.000199234
AT1G67070	0.248666	0.342792	0.708697	0.434956	0.957322	3.17638		1	1	1	1	0.3775	1.37875e-07
AT1G67360	0.58565	0.587714	0.461121	-0.197305	0.87671	1.5245		1	0.994742	1	1	0.125021	0.000565454
AT1G67520	-0.150316	1.03025	1.04066	-0.300833	2.02724	2.91744		1	0.955813	1	1	0.0265515	1.79906e-09
AT1G67635	0	0.756756	0	0	0	3.37767		-	1	-	-	-	0.000789343
AT1G67800	0.561671	0.964206	0.210506	0.114986	1.12824	1.5927		1	0.332976	1	1	0.0236439	0.00014427
AT1G67810	0.288905	1.20878	0.099968	0.204908	2.46668	2.04296		1	0.061856	1	1	3.52414e-07	0.0197266
AT1G67850	0.512667	0.878846	0.506367	0.172573	1.2572	1.50608		1	0.373558	1	1	0.00305585	0.000185438
AT1G67920	0.0155722	2.18139	0.642431	-0.0682782	2.56759	2.25901		1	0.00228083	1	1	1.47994e-05	7.33811e-08
AT1G67970	0.556836	0.844929	0.690204	0.706668	1.02688	1.52261		1	0.666859	1	1	0.165246	0.000546441
AT1G67980	-0.624828	2.76381	1.37895	-0.418604	3.26885	3.54452		1	0.00622813	0.739759	1	9.30432e-05	5.99687e-11
AT1G68200	1.28759	-0.18347	0.283281	0.469335	0.125483	3.19009		1	1	1	1	1	2.32904e-08
AT1G68570	0.476218	0.51474	1.12959	0.351564	0.347157	1.75478		1	1	0.17053	1	0.875315	3.66912e-06
AT1G68620	0.75946	1.97461	1.65258	-0.0406056	3.22085	5.16263		1	0.0141102	0.534446	1	5.93464e-07	4.50284e-15
AT1G68690	-0.342607	1.22167	0.75638	-0.360067	0.93914	2.14259		1	0.427976	1	1	0.480892	9.75678e-05
AT1G68710	0.196525	0.826679	0.315878	-0.241235	1.18552	1.77484		1	0.549336	1	1	0.0386158	3.93162e-05
AT1G69270	0.0559259	0.537589	0.296166	-0.209367	1.07351	1.49653		1	1	1	1	0.104605	0.000496351
AT1G69410	0.578198	0.145764	0.214217	0.169988	0.67466	1.44339		1	1	1	1	0.288901	4.93177e-05
AT1G69490	1.12919	0.803973	0.927667	0.947041	1.98541	2.67425		1	1	1	1	0.00457825	6.53599e-07
AT1G69520	0.661519	0.770123	0.745705	0.044338	1.95183	1.50306		1	1	1	1	0.000333644	0.00277871
AT1G69610	0.245001	0.180207	0.360087	-0.0987005	0.731681	1.64551		1	1	1	1	0.471165	0.000332058
AT1G69720	1.61502	1.80387	0.814948	0.966794	2.1263	1.72592		0.117726	0.000456009	0.861664	1	1.00069e-06	4.69742e-06
AT1G69790	-0.282798	0.705916	-0.549855	-0.397907	1.08949	2.46814		1	1	1	1	0.615118	0.000103517
AT1G69840	0.580161	1.05282	0.597819	0.32374	1.51589	1.48891		1	0.115669	1	1	8.52953e-05	5.58289e-05
AT1G69930	0.0576621	1.65913	0.238881	0	1.65524	2.54464		1	0.529304	1	-	0.384192	1.17076e-05
AT1G70140	-0.228897	0.738224	0.0874831	-0.039998	1.15965	1.93852		1	1	1	1	0.472278	0.000907244
AT1G70170	0	0.530539	0.0221413	0	2.11407	3.05966		-	1	1	-	0.194543	2.36626e-05
AT1G70690	1.33182	1.69812	0.643534	0.872287	1.88431	3.06127		0.791782	0.0388608	1	1	0.0493464	2.48916e-06
AT1G70810	0.716805	0.307243	-0.0486315	0.244555	0.92344	1.33483		1	1	1	1	0.0783179	0.000918713
AT1G71040	0.936004	0.937364	0.822383	0.238538	1.29058	1.54982		0.0981145	0.0858726	0.718042	1	0.000258	1.48994e-05
AT1G71390	0	3.33691	2.63158	0	2.9309	4.3882		-	0.00205978	0.065089	-	0.0200991	4.19374e-11
AT1G72060	2.2868	2.03071	0.655031	2.27158	2.4638	1.12198		0.0264928	0.00193753	1	0.24786	1.62028e-06	0.0235175
AT1G72070	0.982343	1.26001	0.676039	0.329737	2.05941	1.23238		1	0.198166	1	1	0.000274674	0.0527285
AT1G72280	0.879694	1.02055	0.917072	0.50235	1.58634	1.58378		1	0.563344	0.961292	1	0.00466032	0.000442527
AT1G72540	-0.555451	0.755656	1.51417	-1.29324	1.996	4.21668		1	1	1	1	0.0487515	4.29016e-13
AT1G72680	0.631355	0.624664	0.405902	0.395368	1.20834	1.6288		1	0.882545	1	1	0.00537585	2.91241e-05
AT1G72890	0.00820829	0.544804	-0.0802487	0.0101526	1.13364	2.13107		1	1	1	1	0.146435	6.72068e-07
AT1G72900	0.900047	1.15028	0.153945	0.667488	1.95837	1.48351		0.710398	0.193563	1	1	1.14203e-05	0.00437013
AT1G72930	1.13746	0.743737	0.178166	0.610337	1.34011	1.01999		0.00576949	0.622818	1	1	0.00087507	0.0164922
AT1G73010	0.838645	0.0995462	1.20816	0.800655	1.4827	3.92138		1	1	1	1	0.257219	1.31616e-11
AT1G73130	-0.158998	-0.0462903	0.818472	0.050328	0.20336	2.02393		1	1	1	1	0.996947	0.000208587
AT1G73260	0.825766	1.48977	-0.168082	0.222704	3.54292	4.41699		1	0.636718	1	1	8.26273e-09	4.61859e-06
AT1G73805	1.99387	1.65305	0.997195	0.796537	2.25499	2.52918		9.30994e-05	0.00301006	0.527452	1	1.81702e-06	2.64556e-12
AT1G73810	1.3904	2.52829	0.630334	1.02463	3.46696	2.13632		1	0.000246559	1	1	7.56768e-10	7.49209e-06
AT1G74010	-0.0369587	0.701109	-0.24397	0.0317499	1.80673	2.30824		1	1	1	1	0.122944	0.000636389
AT1G74080	0	1.1598	0	0	1.87218	3.9674		-	1	-	-	0.40974	1.01749e-05
AT1G74210	0.817129	0.465145	0.61041	0.22178	1.15986	1.81558		0.870642	1	1	1	0.0262545	6.95241e-07
AT1G74300	0.807304	1.03004	0.599227	0.0602164	1.05557	1.67812		1	0.328011	1	1	0.083578	0.000242293
AT1G74360	0.305876	1.09885	0.380541	0.0801578	1.65972	1.86275		1	0.377383	1	1	0.00363001	9.62895e-05
AT1G74590	0.339851	3.43445	1.23291	0.447852	4.14961	3.82168		1	3.0813e-06	0.199298	1	5.31249e-11	1.26271e-19
AT1G74710	0.818356	1.42223	0.869599	0.401865	2.17616	2.48267		0.754928	0.00628494	0.962108	1	5.22589e-09	8.89834e-09
AT1G75000	0.581201	0.713279	0.343209	0.431066	2.0898	2.58063		1	1	1	1	0.000697366	1.50918e-07
AT1G75040	1.99125	3.18663	2.78888	0.706793	3.33267	4.44959		0.00148248	3.47525e-14	1.12954e-06	1	9.78602e-15	1.67558e-18
AT1G75170	0.0745047	0.711964	0.50514	0.061263	1.21531	1.6369		1	0.813672	1	1	0.013823	0.000177697
AT1G75690	-0.409556	-0.272925	-0.291224	-0.0520473	-0.481164	-1.15203		1	1	1	1	0.536634	0.000702679
AT1G75830	0	0	0.387976	0.501813	4.03605	1.13506		-	-	1	1	4.28044e-07	0.549937
AT1G76040	1.02938	0.740048	1.23937	0.385113	1.49368	2.79974		0.603626	0.581176	0.0492806	1	0.000479606	6.43546e-12
AT1G76930	0.776802	1.31545	1.23372	0.554862	1.58709	2.39697		1	0.0959015	0.0139856	1	0.00336955	1.07098e-08
AT1G76960	2.876	2.62245	1.29365	1.03699	3.32023	3.42804		0.038357	0.000545816	0.859616	1	1.04303e-05	8.68322e-10
AT1G76970	0.592047	1.1922	0.782546	0.162033	1.83681	1.79148		1	0.104859	1	1	9.82296e-05	9.23676e-06
AT1G76980	0.753354	1.2002	0.594334	0.856899	1.53989	1.9963		1	0.208039	1	1	0.0233142	2.06252e-06
AT1G77370	0.680288	0.436353	0.224838	0.416471	0.780735	1.223		1	1	1	1	0.193214	0.000952905
AT1G77510	1.28726	1.5743	1.08854	0.224321	2.13737	2.24754		0.0362871	0.000170971	0.284684	1	2.05034e-08	6.22513e-09
AT1G77810	0.918795	0.662977	0.694999	0.280549	1.25061	1.80902		0.849887	0.992147	1	1	0.0167439	2.58689e-05
AT1G78190	0.952154	0.715727	0.355759	0.180333	1.61876	2.15297		1	1	1	1	0.0725894	7.53558e-06
AT1G78290	0.433883	0.809811	0.45518	0.273086	1.39073	1.64982		1	0.883112	1	1	0.0158589	0.000120417
AT1G78410	1.82959	1.92153	0.955103	1.33307	2.71691	2.50569		0.0345237	0.000142211	1	1	2.12278e-09	1.08681e-07
AT1G78780	0.696541	0.103184	0.0792084	-0.959842	2.05397	4.68281		1	1	1	1	0.0357446	2.44017e-16
AT1G79450	2.79757	0.769833	1.05381	1.08526	1.9469	2.20323		0.0926184	1	1	1	0.00066962	3.21987e-05
AT1G79680	0.273842	1.33332	0.112517	0.33612	2.24985	1.44433		1	0.179984	1	1	6.98915e-05	0.0831716
AT1G80130	1.82842	0.900412	1.49302	0.324074	1.07738	2.19892		0.0981145	0.925608	0.151855	1	0.371767	6.19284e-05
AT1G80160	0	0	0	0	0	3.83248		-	-	-	-	-	8.82197e-06
AT1G80590	0	0.2138	0.0490235	0	2.46216	3.0118		-	1	1	-	0.133504	0.000358247
AT1G80840	0.748059	1.71133	0.242366	0.884347	2.51259	1.35393		1	0.227487	1	1	8.73165e-05	0.319756
AT2G01540	-0.023226	0.6966	0.290186	-0.11723	1.12993	1.52177		1	0.652299	1	1	0.0174503	6.48638e-05
AT2G01670	0.209175	0.589644	0.658368	-0.0441884	0.975027	1.68509		1	0.813558	1	1	0.0938128	7.28018e-07
AT2G02370	0.377865	0.527124	0.632015	0.159007	0.686388	1.69409		1	1	1	1	0.469316	0.000122903
AT2G02390	0.74202	0.889022	0.208714	0.452432	1.82057	1.85309		0.855473	0.279512	1	1	1.09372e-06	2.41676e-07
AT2G02520	-2.01697	-0.561089	0.212052	-2.4454	-0.812248	-0.512468		7.8943e-05	1	1	4.99972e-05	0.585776	0.717128
AT2G02810	0.48062	0.994045	0.931841	0.0234269	1.38859	1.94086		1	0.189615	0.734874	1	0.000520235	4.98391e-06
AT2G02930	1.25624	1.99372	1.58109	1.04685	2.77546	2.72145		1	0.00564697	0.28182	1	4.52692e-08	9.79052e-08
AT2G03120	0.480122	0.453616	0.456303	-0.0406597	0.633091	1.22219		1	1	1	1	0.348143	0.000986422
AT2G03505	0.100653	0.209122	0.526923	-0.417086	1.07641	2.50084		1	1	1	1	0.537512	4.10452e-05
AT2G04100	0.528377	-0.718057	0.948413	0.189263	0.0699256	2.49951		1	1	1	1	1	7.88997e-07
AT2G04135	0.380142	0.157396	1.87083	0.700401	2.29027	3.51996		1	1	0.565178	1	0.038688	1.14567e-07
AT2G04400	0.624377	0.897881	0.467923	0.191638	1.72612	1.44864		1	0.0897929	1	1	2.05963e-08	3.72276e-05
AT2G04430	0.266701	1.37596	0.627318	-0.61422	1.74509	2.42986		1	0.10017	1	1	0.000747491	1.61607e-08
AT2G04450	2.83788	2.20629	1.63184	0.957769	2.6684	3.03714		4.05405e-06	7.9651e-07	0.0851375	1	1.8773e-11	2.1848e-11
AT2G04460	1.69464	2.15721	2.62199	0.638426	2.59128	4.21111		0.308095	0.07314	0.00136989	1	0.00799773	1.91088e-12
AT2G04495	1.49154	2.75983	1.539	0.382235	3.51676	2.81048		1	1.06241e-07	0.0375295	1	1.41129e-09	3.57845e-12
AT2G05940	0.436491	0.532724	0.33909	0.0190341	1.16935	1.76668		1	1	1	1	0.0128448	2.323e-06
AT2G13790	1.03655	1.20175	0.700701	0.345968	1.60912	1.45804		0.343993	0.0705169	1	1	0.000162113	0.000229094
AT2G13800	0.872816	1.20793	0.43637	0.399578	1.47789	1.24847		0.677362	0.059145	1	1	0.000850566	0.00593003
AT2G13810	2.63966	2.67494	1.35713	0	4.10407	3.97416		0.115171	3.71866e-05	0.4867	-	5.30726e-14	8.39627e-16
AT2G14560	4.48793	1.72466	1.11408	2.07525	2.46474	2.33805		2.01721e-12	0.00179276	0.200876	0.0514357	1.83765e-07	1.12879e-10
AT2G14610	4.98207	3.32197	1.81134	2.34434	3.86344	4.70263		2.39732e-21	0.000461147	0.0582702	1	2.17234e-05	1.41759e-14
AT2G15042	0.935377	1.25203	0.682375	0.525363	1.77082	1.27132		1	0.0294718	1	1	7.57687e-06	0.00698005
AT2G15390	0.995566	0.998859	0.363028	0.75689	1.69377	1.21105		0.842509	0.32921	1	1	0.000280565	0.0943793
AT2G16700	0.44421	0.255727	0.289075	0.490853	0.417014	1.35585		1	1	1	1	0.823914	0.000299776
AT2G17040	1.64395	1.79451	1.71786	0.371899	2.43425	2.6374		0.0361242	0.0109445	0.00172293	1	7.33495e-05	1.57417e-12
AT2G17120	1.71781	1.2097	0.52429	0.708	1.44407	1.06684		2.51485e-05	0.0207437	1	1	8.95916e-05	0.0130737
AT2G17220	0.489235	0.887115	0.350225	0.0583915	1.16318	1.47879		1	0.388901	1	1	0.0134936	3.45253e-05
AT2G17290	0.28975	1.34269	0.873679	0.00362995	1.45054	1.65741		1	0.024142	0.526763	1	0.000197866	3.41403e-05
AT2G17720	0.429888	0.726232	0.453755	0.152715	1.20788	1.2926		1	0.381608	1	1	0.000499808	0.000454564
AT2G17740	0.741609	0.582519	1.13435	0.475187	0.505217	2.13372		1	1	0.732416	1	0.820612	2.12268e-06
AT2G18660	3.54291	3.62221	2.18555	0.953255	4.4151	3.89741		8.10516e-08	3.6841e-07	0.00348786	1	1.69967e-09	2.2626e-22
AT2G18680	0.80448	1.344	0.896539	0.829472	2.05372	2.21383		1	0.543422	1	1	0.00887559	2.48314e-05
AT2G18690	1.22035	2.11395	1.47507	0.979469	2.91987	3.576		0.0590755	1.2465e-07	0.000944369	1	7.20725e-16	2.56605e-21
AT2G18950	0.537726	0.0273228	0.33916	0.294317	0.394785	1.50027		1	1	1	1	0.775698	0.000451266
AT2G19190	1.63181	1.87041	1.47673	1.2353	2.16339	2.99054		0.105539	0.0230687	0.0071854	1	0.000517645	1.77022e-13
AT2G19570	0.0195541	0.618927	0.358886	-0.0574429	0.725064	1.48745		1	1	1	1	0.453544	0.000964105
AT2G20142	1.20909	1.77216	1.35155	0.0458835	2.35174	2.46302		1	0.000667866	0.229678	1	1.84492e-08	3.86397e-10
AT2G20835	-0.960735	-0.597022	-0.628366	-0.323947	0.66109	-0.421468		1	1	1	1	0.863948	0.912
AT2G21188	0.220184	0.56373	0.215994	0.210646	1.17416	1.45572		1	1	1	1	0.0726826	0.000770696
AT2G22470	-0.509466	0.996108	0.779527	-0.220785	1.28755	4.60558		1	0.873716	1	1	0.24735	9.65469e-18
AT2G22810	-0.048667	-0.842967	-0.141196	-0.191483	-1.50159	-2.69161		1	0.958865	1	1	0.0737045	6.1614e-05
AT2G23130	-0.868699	-0.716428	-0.10865	-0.543134	-1.71778	-0.949726		1	1	1	1	0.000473853	0.120235
AT2G23170	0.0154537	0.387609	0.134208	0.0750313	0.732977	1.99028		1	1	1	1	0.45317	6.67004e-07
AT2G23680	1.10318	1.10968	0.8139	0.30236	1.72709	2.10045		0.454471	0.0386091	1	1	2.92975e-06	0.000333972
AT2G23808	1.27906	0.906664	0.95947	0.891689	1.54176	2.11913		1	1	1	1	0.127515	0.000899091
AT2G23810	0.644428	1.11973	0.491379	0.531601	1.70101	1.83627		0.93968	0.0333936	1	1	3.12995e-06	9.99011e-08
AT2G23830	0	1.76585	1.61536	0	2.41733	4.29119		-	0.895473	1	-	0.149306	3.71759e-07
AT2G24160	1.44484	1.59296	0.64178	0.863471	1.7974	1.82302		0.0210334	0.00358326	1	1	7.52724e-05	0.000352862
AT2G24180	0.403632	0.556813	0.233622	0.066038	1.24337	1.31516		1	0.915445	1	1	0.0011903	0.000151037
AT2G24850	2.37217	1.2901	0.525534	-0.519882	2.63879	2.18081		0.42857	0.887162	1	1	0.000395472	1.09695e-07
AT2G25000	1.31099	1.10697	0.989788	0.591225	1.6558	2.44096		0.119876	0.174621	0.718042	1	0.000293551	1.21956e-07
AT2G25110	0.779482	0.561349	0.493931	0.201779	0.807805	1.34528		0.475691	0.925434	1	1	0.168603	0.000138802
AT2G25440	0	2.85334	1.17526	0	2.62124	2.95198		-	0.0134306	1	-	0.0239345	3.37349e-08
AT2G25510	2.76004	1.49686	0.777099	1.49588	1.69287	1.52753		3.30684e-13	0.000755302	0.557036	0.0272535	4.30789e-06	4.17704e-07
AT2G26010	-4.17749	0.830153	-0.386762	-3.49172	2.99585	1.47466		0.117726	1	1	0.912623	0.000102812	0.329857
AT2G26020	-3.06871	0.0318968	-1.23173	-2.41254	3.14548	1.04575		0.592593	1	1	1	8.23885e-06	0.582969
AT2G26400	2.64058	1.07707	1.04668	0.306383	0.976122	2.63341		2.24455e-06	0.983787	1	1	0.607183	0.000169997
AT2G26440	1.75909	1.41292	0.947526	0.90881	1.81065	1.94086		1.20069e-05	0.00500981	0.432535	0.417778	1.48041e-06	1.39596e-08
AT2G26600	0.341635	0.748172	0.438764	0.0791	1.08534	1.44107		1	0.839823	1	1	0.080284	8.52189e-05
AT2G27389	0	0	-0.03255	0	0	2.82002		-	-	1	-	-	7.92637e-05
AT2G27402	-0.413563	-1.22036	-0.227636	-0.248529	-1.52781	-2.01435		1	0.0587366	1	1	0.00137284	1.84494e-05
AT2G27660	1.45501	1.80983	1.18803	1.25658	2.3338	3.28437		0.954166	0.00472998	0.593896	1	2.28765e-05	1.81058e-13
AT2G28400	0.562869	0.548393	0.532274	0.154463	0.768092	2.43998		1	1	1	1	0.636988	4.87962e-06
AT2G28500	0.364619	0.674722	-0.195524	0.331047	0.973429	1.96087		1	1	1	1	0.421385	3.67819e-05
AT2G28710	0.792914	0.156006	1.28466	1.46372	0.388243	2.32891		1	1	0.799346	1	0.96151	2.47332e-05
AT2G29110	0	1.96192	1.46274	0	1.63642	2.83877		-	0.131463	0.874268	-	0.232961	1.14876e-05
AT2G29120	0.716444	1.34426	1.21705	0.240977	1.35974	2.10027		1	0.0784553	0.127662	1	0.0016261	9.37121e-08
AT2G29290	-0.33311	-0.333127	-0.321777	0.167052	-0.372951	-1.34973		1	1	1	1	0.840101	0.000241159
AT2G29300	-0.0732867	-0.379696	-0.881598	0.442941	-0.22392	-2.0756		1	1	1	1	1	0.000433151
AT2G29350	1.3044	3.40215	1.83581	0.866608	4.34828	4.95441		0.891158	2.04367e-07	0.0139856	1	4.07669e-13	1.57564e-19
AT2G29460	1.29625	1.9649	0.107581	0.376913	4.18565	2.32185		1	0.00320105	1	1	4.2215e-14	5.03204e-05
AT2G29470	0	1.44311	0.0614767	0	4.37895	3.76096		-	1	1	-	4.52692e-08	2.07172e-11
AT2G29720	0.844349	1.14966	0.644565	0.397343	1.9035	1.14689		0.842509	0.0348639	1	1	0.000289836	0.0507502
AT2G29990	1.20192	0.896448	0.201975	0.630833	1.53554	1.82413		0.396014	0.384238	1	1	0.00147752	8.18916e-07
AT2G30140	0.646285	1.20439	0.747613	0.350779	1.78682	1.98134		1	0.0506716	1	1	4.97405e-06	1.50299e-05
AT2G30550	0.619076	0.798517	0.608339	0.401095	1.33682	2.08407		1	0.94512	1	1	0.0400573	1.31197e-09
AT2G30750	1.01373	1.90992	1.40599	1.15375	2.8284	3.13252		0.975608	0.000271781	0.0610625	1	1.75937e-10	1.64559e-12
AT2G30770	1.835	2.63127	0.565879	0.770375	4.74518	3.20152		0.309789	2.37437e-06	1	1	2.72664e-17	3.6085e-07
AT2G31020	0.852725	0.882504	0.350607	-0.0110318	1.14205	1.99565		1	0.862991	1	1	0.337805	0.000592714
AT2G31390	0.282236	0.442407	0.485641	0.124252	0.734724	1.24664		1	1	1	1	0.33098	0.000321175
AT2G31865	1.09409	1.90788	1.3264	0.390238	2.50924	2.90778		0.675772	9.9879e-05	0.0756849	1	6.64672e-10	4.3186e-14
AT2G31880	1.66787	1.7797	1.10195	0.932909	2.10634	2.21078		1.48587e-05	0.000186922	0.0671851	0.43664	3.57076e-06	4.74948e-13
AT2G32030	0.0398723	1.32155	-0.355174	0.527409	2.48162	0.378003		1	0.58719	1	1	0.000106881	0.822786
AT2G32140	0.878475	1.67296	1.69615	-0.716057	2.34332	3.32743		1	0.175311	0.234595	1	0.000545697	1.5094e-10
AT2G32160	2.24809	1.79163	0.920027	1.20791	2.01673	1.84894		1.67232e-05	0.000194347	0.431269	1	2.47452e-08	1.9887e-05
AT2G32190	0.439271	1.74778	0.575307	-0.144849	2.25118	3.87424		1	0.0425864	1	1	3.41457e-05	8.56701e-14
AT2G32210	-0.497719	1.38546	0.774434	-0.209389	0.756527	3.23834		1	0.285234	1	1	0.685555	2.10937e-09
AT2G32680	2.73902	2.86122	2.16895	1.54909	2.86643	2.94377		0.00399631	3.89481e-07	6.34677e-05	1	2.42897e-07	4.70079e-13
AT2G33080	0	2.65898	1.29146	0	3.09304	3.03723		-	0.0600406	1	-	0.00103038	0.000254284
AT2G33530	1.14972	1.11533	0.719625	0.391804	1.27652	1.23757		0.0179968	0.0541205	0.994712	1	0.000590591	0.00180367
AT2G33580	1.39668	1.10281	1.21586	0.513256	1.51692	2.63246		0.409957	0.587043	0.142874	1	0.0328472	1.86276e-11
AT2G33770	0.463859	0.335457	0.703229	0.343044	0.540014	1.23307		1	1	0.961292	1	0.51281	0.000512935
AT2G34500	0	0.501177	0.846393	-0.28758	1.60726	3.11249		-	1	1	1	0.32317	4.44178e-05
AT2G34930	-0.383141	-0.866785	-0.798376	-0.123717	-0.780395	-1.96387		1	0.744108	1	1	0.473301	0.000130332
AT2G34940	1.59297	1.1312	2.18903	-0.35787	2.53681	3.18956		0.788899	0.747899	0.00886617	1	0.000169932	2.18686e-09
AT2G35940	-0.0578977	0.277443	0.198212	-0.298128	0.677402	1.37656		1	1	1	1	0.208179	0.000175247
AT2G35980	2.03479	2.9567	1.4032	2.08486	3.36766	4.53179		0.931317	1.66578e-06	0.28182	1	3.30639e-09	7.07388e-21
AT2G36580	0.651473	0.480736	0.614337	0.402662	0.700767	1.60073		1	1	1	1	0.250264	0.000129118
AT2G37710	1.18874	0.97322	0.563172	0.445691	1.35197	1.62944		0.0181739	0.102929	1	1	0.00050781	5.73143e-07
AT2G37750	0.327811	-1.04848	0.416179	0	-0.132397	2.9295		1	1	1	-	1	0.000433151
AT2G37760	1.34138	0.539902	0.717845	-0.496709	1.71403	2.83341		0.359231	1	1	1	0.00086765	2.49999e-10
AT2G37770	1.11763	0.925403	-0.432982	-0.13492	1.0621	3.51382		1	1	1	1	0.700415	2.85075e-07
AT2G37830	-1.56475	1.16859	1.65554	-0.890102	2.21964	4.33901		1	1	0.935929	1	0.0064725	4.59111e-09
AT2G37970	0.33715	0.610401	0.159727	0.169202	1.14505	1.69302		1	1	1	1	0.0223934	2.30601e-05
AT2G38250	0.105104	0.706227	0.250055	-0.190506	1.81288	2.94527		1	1	1	1	0.0632437	8.38226e-06
AT2G38470	0.997533	1.64777	0.65126	1.16487	2.16132	1.51484		0.120055	0.000633549	1	0.392597	4.52692e-08	0.00206636
AT2G38860	0.787033	1.689	1.02047	0.247919	2.41289	2.34666		0.571509	3.92459e-05	0.16992	1	2.38011e-12	8.825e-10
AT2G38870	0.206596	0.278446	0.301081	0.355125	0.739187	1.74305		1	1	1	1	0.170552	9.23979e-07
AT2G38940	0.144277	0.735229	0.948324	0.0644882	1.66258	2.39198		1	1	0.718042	1	0.0450282	2.49569e-09
AT2G39030	-1.05584	2.08063	-0.658151	-2.81638	2.96916	1.7093		1	0.743995	1	1	2.14608e-15	0.00268947
AT2G39040	-1.76238	1.27271	-0.345507	-2.1509	2.80085	2.5966		1	1	1	1	0.0194341	2.86781e-05
AT2G39210	1.39296	1.17082	0.731151	0.669774	1.92856	2.23183		0.00328078	0.0462709	0.789202	1	4.90154e-06	1.9059e-10
AT2G39518	0.921831	0.930464	0.445232	0.237539	2.59841	4.0843		1	0.912397	1	1	1.26298e-06	1.07327e-13
AT2G39530	0.808883	2.17821	0.939299	0	3.30556	3.79634		1	0.290729	1	-	0.000214302	1.36916e-09
AT2G40000	0.283125	1.04551	0.183642	0.307777	1.97441	1.43932		1	0.314777	1	1	7.08245e-05	0.0110554
AT2G40095	0.600524	0.870461	0.419016	0.280376	1.3555	1.78213		1	0.68966	1	1	0.0169754	4.21856e-06
AT2G40390	0.497548	0.986625	0.345212	0.382508	1.64391	1.02488		1	0.475997	1	1	0.000755403	0.160067
AT2G40520	-0.319023	0.665754	0.636037	-0.45913	0.386813	1.52458		1	1	1	1	0.824193	9.99354e-05
AT2G40600	1.14213	0.994195	0.551739	0.480375	1.45354	1.07925		0.0515275	0.0816169	1	1	2.40126e-05	0.00263032
AT2G40750	2.01821	0.880221	0.282233	0.918741	1.34345	1.06002		6.13256e-07	0.512649	1	0.85061	0.00431689	0.086012
AT2G41090	2.29439	0.820838	0.316576	1.03212	1.15808	0.768351		3.36767e-08	0.327415	1	1	0.000545697	0.125133
AT2G41100	1.3316	1.50885	0.818365	0.967577	2.16337	1.57428		0.00670384	0.000271781	0.885738	1	5.96645e-12	2.39306e-05
AT2G41250	0.801694	1.07692	0.332303	0.977916	1.66934	2.65655		1	0.312677	1	1	0.000174863	3.14993e-06
AT2G41380	1.75584	0.958383	1.11722	0.83397	2.47224	3.30104		1	1	1	1	0.000215121	3.29439e-08
AT2G41410	0.941991	1.15833	1.00909	0.422862	1.71085	2.10318		0.872628	0.00845829	0.28182	1	3.02157e-06	1.65188e-08
AT2G41800	0.038551	-0.335518	0.730167	-2.27727	0.601858	2.51185		1	1	1	1	1	0.000237966
AT2G41905	0.612091	0.822915	0.206643	-0.279186	1.38693	4.07929		1	1	1	1	0.248655	8.8343e-16
AT2G41990	-0.549635	-0.817506	-0.50924	0.0390831	-1.57975	-2.24929		1	0.867245	1	1	0.010245	0.000217344
AT2G42350	-0.625828	1.619	0.7262	-0.739609	2.20376	3.19963		1	0.99013	1	1	0.157883	1.22523e-05
AT2G42360	0.938118	1.55627	1.21771	0.488112	1.77425	3.05456		1	0.138784	0.455723	1	0.00864712	2.57019e-13
AT2G42540	0.0465618	-0.767926	-0.634201	-0.229756	-1.39119	-1.72004		1	1	1	1	0.051903	0.000379526
AT2G43000	0.0904436	2.55227	0.870576	-0.581233	3.28234	2.7792		1	0.00374476	1	1	7.25309e-08	5.75109e-07
AT2G43290	0.230493	0.338959	0.339017	-0.203831	0.389273	1.81358		1	1	1	1	0.891563	1.50356e-06
AT2G43510	0.101378	1.12115	0.284315	-0.00974937	2.40272	2.87835		1	0.2681	1	1	2.56535e-06	3.96851e-13
AT2G43550	-0.0696595	-0.639658	-0.752288	-0.0883643	-0.958769	-1.58125		1	0.843043	1	1	0.0179921	0.000132549
AT2G43570	1.84933	3.03568	2.2429	0.69661	3.99114	5.19412		0.0545961	0.00240157	0.00148907	1	1.21557e-05	7.94151e-21
AT2G43590	-0.605442	0.394829	0.324696	-0.165531	1.57952	1.22127		1	1	1	1	3.8334e-05	0.0425097
AT2G44240	0	3.89995	2.69673	0	3.82729	5.02144		-	7.82031e-06	0.00549286	-	6.0219e-05	5.01392e-14
AT2G44290	1.64418	1.60976	1.33768	0.656724	2.10337	2.96132		0.00467961	0.000670714	0.0196743	1	0.000111116	1.26271e-19
AT2G44380	0.0764625	1.02002	1.71815	-1.11221	0.500915	2.54093		1	0.972448	0.150449	1	0.946242	8.4309e-05
AT2G45180	-0.817401	-0.405322	0.0154958	-0.11931	-1.20757	-1.17081		0.806396	1	1	1	0.000235311	0.00104349
AT2G45220	1.01759	3.44514	1.70419	-0.264084	3.87624	4.79023		1	4.74896e-08	0.0185744	1	8.42604e-11	1.79092e-22
AT2G45470	-0.4574	-0.768607	-0.260415	-0.272195	-1.34265	-1.2867		1	0.35137	1	1	0.000252412	0.00171638
AT2G45510	0.63725	0.820764	0.39161	0.146718	1.07324	1.5355		1	0.857351	1	1	0.0272497	0.00011615
AT2G45760	0.657942	2.30916	0.203168	0	2.90182	3.99216		1	0.0486311	1	-	0.000413039	1.61375e-13
AT2G46150	0.0735526	-0.206006	0.935915	-0.355421	1.70444	2.67195		1	1	1	1	0.019781	9.12516e-07
AT2G46400	2.14567	1.84431	1.26231	0.660525	2.72632	2.82065		0.0179825	0.0618627	0.386544	1	4.36629e-05	1.33543e-09
AT2G46430	2.6155	1.21053	0.398559	1.28743	1.75991	1.25789		1.59323e-07	0.0495322	1	0.392597	9.3978e-05	0.00709053
AT2G46440	1.95798	1.06253	0.333386	0.913683	1.38801	0.733021		1.02638e-06	0.154511	1	1	0.00124496	0.175408
AT2G46600	0.865551	0.875621	0.455464	0.634595	1.35822	1.24035		0.366702	0.22738	1	1	0.000339977	0.00126291
AT2G46620	0.197589	1.00815	0.653874	0.0311671	1.56406	1.62004		1	0.19581	1	1	0.000228533	7.70896e-05
AT2G46680	-0.225704	0.576461	0.357543	-0.17542	0.668598	1.78005		1	1	1	1	0.583185	0.000210989
AT2G47130	3.09503	1.49225	1.50858	1.35691	2.60351	2.88663		5.66125e-05	0.00650565	0.150719	1	2.16268e-10	3.33099e-08
AT2G47190	-0.0883996	1.63843	1.43424	-0.964893	2.05094	3.28737		1	0.65986	0.767979	1	0.16114	8.07146e-07
AT2G47800	1.65871	0.737596	1.63403	0.851377	1.34255	2.76384		0.222415	1	0.0349524	1	0.0169812	1.34962e-09
AT3G01290	1.05134	1.04211	0.759768	0.801055	1.73302	1.32864		0.356851	0.028507	0.891901	1	7.36822e-08	0.000143444
AT3G01420	-0.312833	2.519	2.55076	0	3.21617	6.99671		1	0.063703	0.0154447	-	0.000339597	1.91888e-34
AT3G01830	1.05125	1.59678	0.608244	-0.0735089	2.15013	2.1394		1	0.0353898	1	1	4.76448e-05	4.89639e-07
AT3G01970	0.396515	0.628478	0.446307	0.165775	1.65265	2.69213		1	1	1	1	0.0316752	5.1199e-05
AT3G02040	0.186756	0.491622	1.03955	0.344556	0.920486	1.919		1	1	0.861664	1	0.261785	2.88932e-05
AT3G02770	0.264135	0.836174	0.407179	0.0068581	1.24437	1.00777		1	0.322217	1	1	0.000710762	0.0132989
AT3G03341	0.00621268	0.120126	1.14517	0.143307	0.754488	2.19768		1	1	1	1	0.760269	0.000889409
AT3G03440	0.663094	0.973862	0.338971	-0.217024	1.34541	1.72761		1	0.736821	1	1	0.0677867	0.000169325
AT3G03470	-0.181109	0.858191	0.183843	0.341718	1.36957	2.32023		1	0.599413	1	1	0.000885233	1.48046e-06
AT3G03610	0.458015	0.538472	0.686464	0.602484	0.917553	1.81015		1	1	1	1	0.112733	4.4951e-05
AT3G03640	0.199369	0.249261	0.549148	-0.0975949	0.668726	1.85004		1	1	1	1	0.512669	2.45376e-06
AT3G03650	-0.220964	0.0258765	0.400309	-0.830103	0.108712	2.11331		1	1	1	1	1	0.000363274
AT3G04060	0.93696	0.709702	0.286703	1.9581	1.46567	2.97981		1	1	1	1	0.276153	6.0368e-09
AT3G04070	0.54199	1.13987	0.678761	-0.2328	1.76574	3.22406		1	0.672714	1	1	0.0479798	2.47948e-11
AT3G04220	-0.29797	0.645361	0.75727	-0.666624	2.51342	2.36563		1	1	1	1	0.00011828	4.37692e-05
AT3G04717	0.432824	1.61792	0.822487	0	2.53286	3.16494		1	0.900663	1	-	0.0205383	1.52884e-08
AT3G04720	-0.331363	0.639225	-0.1866	-0.432783	2.31557	1.2158		1	0.94197	1	1	3.52054e-07	0.160055
AT3G05500	0.279139	0.442131	0.338897	-0.105669	0.412357	1.47917		1	1	1	1	0.78951	0.00015083
AT3G05630	-0.188396	-0.602969	0.508872	0.15719	0.0907883	1.72308		1	1	1	1	1	0.000641834
AT3G05900	-0.823387	-0.652403	-0.0927786	-0.326634	-1.30031	-1.30558		0.784533	0.875535	1	1	0.000524945	0.00109945
AT3G05970	0.667189	0.535974	0.426306	0.416179	0.872717	1.20482		1	0.915279	1	1	0.045339	0.000581178
AT3G06890	0.119858	0.904956	0.00202154	-0.230221	1.6086	2.61056		1	1	1	1	0.058713	1.68784e-08
AT3G07195	0.80413	1.30526	0.732979	0.561926	1.76848	1.27757		1	0.208039	1	1	0.000221112	0.00927046
AT3G07390	0.288901	0.343897	0.305399	0.0307073	0.23698	1.61305		1	1	1	1	0.925643	4.17138e-07
AT3G07520	0.440165	1.71262	1.10115	0.556687	1.72821	2.16855		1	0.00205978	0.771891	1	0.0073686	1.95701e-05
AT3G07570	0.426182	0.323701	0.258534	-0.174258	0.44833	1.40225		1	1	1	1	0.767718	0.000762588
AT3G07580	0.347696	0.925694	0.866431	0.354945	1.23863	1.7975		1	0.71551	1	1	0.213387	0.000288842
AT3G07600	-0.0865462	0.349326	0.976207	0.622643	0.161192	2.21755		1	1	1	1	1	0.00085426
AT3G08690	0.82706	0.786957	0.41983	0.509648	0.954854	1.55914		0.337185	0.328182	1	1	0.0255908	1.01471e-05
AT3G08870	1.5493	0.893576	0.630365	0.679081	1.36344	1.70277		0.183567	0.621476	1	1	0.0140298	0.000654447
AT3G08970	0.113263	1.55281	0.939674	-0.354514	1.90248	2.32615		1	0.0168525	1	1	0.0109664	1.92721e-06
AT3G09010	0.213109	0.964128	0.481305	-0.323433	2.0248	1.89251		1	0.603627	1	1	4.89938e-05	6.9272e-05
AT3G09270	-0.638072	0.842926	0.82244	-1.19386	1.37461	4.08361		1	1	1	1	0.0894529	1.07327e-13
AT3G09405	0.757012	0.909713	0.563555	0.688078	2.15445	1.83304		1	0.621476	1	1	3.06451e-06	0.0269748
AT3G09490	1.51481	1.26389	0.189186	1.23921	2.45304	1.43129		0.483082	0.400786	1	1	1.93679e-05	0.00527128
AT3G09940	0.539815	1.42571	0.777584	-0.623107	2.47316	1.07377		1	0.196342	1	1	3.75734e-07	0.188976
AT3G09960	0	1.37074	0.68568	0	1.35594	3.76652		-	1	1	-	0.667554	1.62565e-09
AT3G10320	-0.944562	-0.645691	0.0707093	-0.12374	0.838527	2.81648		1	1	1	1	0.575905	8.5686e-07
AT3G10815	-0.614711	1.52975	0.69769	-0.755844	2.66787	3.41501		1	0.615003	1	1	0.00196969	1.78518e-09
AT3G11010	2.73545	2.20951	1.33533	0.948266	2.55334	2.33509		5.98807e-09	1.22128e-05	0.0184478	1	3.28445e-08	1.57417e-12
AT3G11080	0.252827	0.524112	1.0095	0.567508	1.32493	3.2099		1	1	1	1	0.407224	2.94111e-08
AT3G11340	2.11157	1.86291	1.17302	0	3.43422	2.86551		0.919982	0.0333936	0.702528	-	2.38921e-08	6.5709e-10
AT3G11580	0.169094	0.45801	0.254749	-1.27347	0.696215	1.99993		1	1	1	1	0.540815	0.000390532
AT3G11820	0.599426	0.979267	0.285266	0.430668	1.22918	0.605884		1	0.0989439	1	1	0.000794578	0.240933
AT3G12220	3.87671	1.94021	1.04139	0.937411	2.62453	2.36996		3.38148e-07	0.000456009	0.962108	1	1.70054e-07	1.38446e-07
AT3G12500	-0.358645	1.28101	-0.213387	-0.561066	2.8676	1.85066		1	0.842112	1	1	6.04395e-05	0.00729127
AT3G12740	0.271638	0.629466	0.278596	0.172296	1.32149	1.20418		1	0.716375	1	1	0.000352687	0.00191144
AT3G12830	0.566748	0.835166	0.808614	0.120042	1.38967	1.63719		1	0.472849	1	1	0.00145305	0.000418498
AT3G13090	-0.421047	1.59891	1.07426	0	2.06494	2.97466		1	0.463875	1	-	0.0479903	1.25037e-05
AT3G13100	0.91819	1.71532	1.09805	-0.824551	2.24067	2.99623		1	0.0109988	0.887419	1	0.000144584	3.29789e-11
AT3G13310	0.110469	0.390659	0.444986	-0.27702	0.662072	1.34146		1	1	1	1	0.38712	0.000200342
AT3G13330	0.669047	0.662113	0.615548	0.250112	0.888106	1.30117		1	0.714652	1	1	0.0329643	0.000149545
AT3G13380	-0.0518819	1.07313	0.785388	-0.113143	1.69239	2.06988		1	0.199998	1	1	0.000593016	1.20604e-05
AT3G13433	0	1.11639	0.610931	0	1.05745	3.42191		-	1	1	-	0.718694	1.11617e-07
AT3G13610	1.64359	2.95638	0.858985	0.367287	4.04814	3.53826		1	0.000161619	1	1	2.06197e-11	2.96161e-09
AT3G13790	0.840296	1.24291	0.845791	0.498906	1.90552	2.3327		1	0.0342108	1	1	1.81767e-07	1.5094e-10
AT3G13950	2.20597	2.08123	1.26292	1.81055	3.17759	3.74488		0.757721	0.000461147	0.386544	1	2.21043e-10	8.39627e-16
AT3G14280	0.272285	0.985209	0.534893	0.0442944	1.60446	1.99697		1	0.530172	1	1	0.00531308	1.03012e-07
AT3G14620	1.31429	1.07287	0.422287	0.669181	2.17152	1.43328		0.0698326	0.125548	1	1	6.04095e-08	0.00556101
AT3G15356	-0.445199	1.08096	-0.198094	-0.171651	2.80495	-0.340131		1	0.0107733	1	1	2.80925e-10	0.764465
AT3G15536	2.74783	2.76362	1.47264	0	2.82436	3.3925		0.124012	1.06053e-07	0.0858601	-	2.24075e-08	3.23002e-14
AT3G16510	1.09371	1.2072	0.657127	0.978236	1.10234	1.97745		1	0.289933	1	1	0.271053	0.000985784
AT3G16530	-0.177005	0.876915	0.128408	0.0461422	1.97251	0.00549613		1	0.114039	1	1	4.73677e-06	1
AT3G16990	0.723521	1.45153	0.401182	-0.35958	2.07497	1.43151		1	0.234375	1	1	0.00139743	0.000715549
AT3G17609	0.133662	-0.215239	-0.0616654	0.272629	0.420529	1.49223		1	1	1	1	0.925643	0.000799794
AT3G17690	0.883814	0.795864	0.215894	0.498706	2.38679	3.38189		1	1	1	1	0.000309149	1.46028e-08
AT3G17790	0.0344403	0.635428	0.965379	-0.148982	1.01804	2.42388		1	1	0.420587	1	0.124885	5.99687e-11
AT3G18250	1.19245	2.27131	1.26648	0.101307	2.60995	3.44852		1	0.00814906	0.431269	1	0.001061	1.32246e-12
AT3G18260	-0.608496	-0.0965841	0.277326	-0.888406	-0.605848	1.91054		1	1	1	1	0.720589	0.000285699
AT3G18485	0.20699	-0.173015	1.24392	-0.729457	-0.241422	2.55166		1	1	1	1	1	0.000348135
AT3G19030	0.334739	-0.0378826	0.156429	0.242293	0.190913	0.646197		1	1	1	1	0.996742	0.489248
AT3G19970	0.0705138	0.138374	0.080476	0.157567	0.427447	1.7614		1	1	1	1	0.860875	0.000287521
AT3G20250	0.756919	1.12518	0.680614	0.133803	1.74142	1.9597		1	0.0413563	1	1	1.36217e-05	6.12524e-07
AT3G21080	1.31569	1.88323	1.43921	0.798603	2.79435	3.70635		1	0.0176844	0.177469	1	1.83459e-07	3.76693e-13
AT3G21150	0.486108	1.20853	1.47157	-0.0246082	2.22184	3.21365		1	1	1	1	0.0227276	0.000418949
AT3G21500	0	0	-0.260714	0	2.74288	2.62109		-	-	1	-	0.0973116	0.000355858
AT3G21520	0.688535	2.22825	1.61632	-0.334064	2.04345	3.09094		1	0.00625034	0.597065	1	0.0215079	1.25711e-06
AT3G22060	0.95198	1.02349	0.261384	0.943438	1.41427	0.733982		0.931317	0.246953	1	1	0.000970728	0.181187
AT3G22142	-0.547598	-0.503505	-0.0769751	-0.209623	-1.39032	-1.4526		1	1	1	1	0.0123172	0.000667869
AT3G22160	-0.542464	0.890066	0.439693	-0.669572	1.37861	2.05		1	0.598196	1	1	0.00457825	9.21051e-05
AT3G22231	3.38187	1.30619	0.696593	1.58098	1.51077	1.32057		7.43347e-17	0.0753577	1	0.00484632	0.0153608	0.00949405
AT3G22235	2.97527	0.995245	0.379858	1.31169	1.45552	0.991481		3.77494e-15	0.148687	1	0.0133458	0.000843474	0.0384068
AT3G22240	2.87201	0.938276	0.315705	1.23059	1.41578	0.964169		2.90445e-16	0.196928	1	0.026396	0.000478449	0.0382389
AT3G22600	2.38113	3.07965	1.58229	1.37901	3.59812	3.92658		0.000147394	3.43706e-06	0.0384637	0.936101	2.27327e-09	4.76346e-15
AT3G22910	-0.0998629	0.246981	0.628584	-0.242718	1.6489	3.91747		1	1	1	1	0.0218061	5.09762e-16
AT3G23010	1.30451	1.58368	1.04727	0.700481	2.18829	1.87221		0.891158	0.191315	1	1	0.00336088	0.000273539
AT3G23110	1.83949	1.23733	0.857921	0.889253	1.55606	1.46327		0.00785201	0.0323881	0.993756	1	0.000556941	0.00050987
AT3G23120	2.50499	1.47478	1.61494	0.436025	2.30277	2.9357		0.000178334	0.115653	0.0273242	1	0.000403522	3.41276e-12
AT3G23550	-0.52922	0.551578	-0.20076	-0.242083	2.07209	0.00745953		1	1	1	1	4.84883e-06	1
AT3G24900	1.52016	2.42944	1.71792	0.412489	2.78726	3.06559		1	0.00166258	0.654191	1	0.000202248	4.08599e-05
AT3G24982	1.15871	0.873599	0.229155	-0.771629	2.59153	2.46415		1	0.86316	1	1	4.422e-10	3.77311e-08
AT3G25010	3.11535	3.45058	2.13452	1.3928	3.76883	3.51461		0.0017598	4.26214e-12	0.02337	1	2.77951e-15	3.11602e-09
AT3G25020	1.42301	1.57352	0.985885	0.415182	1.71104	1.59888		0.0564655	0.000287503	0.941315	1	1.5293e-05	0.00145106
AT3G25510	0.875995	2.09067	-0.0401463	-0.821113	2.92725	2.10663		1	0.0386091	1	1	8.84391e-06	0.00713146
AT3G25610	0.643011	1.24836	0.564823	0.149543	1.96603	2.20406		1	0.0730293	1	1	6.26518e-06	6.58742e-06
AT3G25882	2.30157	0.966704	0.563	0.749162	1.87585	1.91337		0.00678063	0.539689	1	1	0.000290776	0.000650854
AT3G26170	0.801533	0.953903	0.641388	0.477702	1.42994	1.95808		0.548686	0.210525	1	1	0.00293204	2.51147e-06
AT3G26210	2.01837	1.74128	1.0948	1.00434	2.16924	2.51976		0.000992325	0.0285915	0.142874	1	0.000100433	1.59339e-11
AT3G26220	0.841967	1.59057	0.798782	0.86539	2.14001	2.36132		1	0.051908	1	1	0.000314409	1.87561e-10
AT3G26230	1.55137	1.01897	0.769896	1.05789	1.72649	1.86269		0.0981145	0.317208	1	1	0.0002228	1.50507e-05
AT3G26440	1.13306	1.88911	0.882684	0.0643726	2.75707	2.92868		0.896832	0.0102953	1	1	3.52054e-07	7.51598e-10
AT3G26470	1.89056	2.0975	0.742433	0	2.80159	3.35515		1	0.0172765	1	-	1.41545e-05	1.74318e-10
AT3G26500	0.224678	1.64179	1.20059	0.13994	2.41719	2.12841		1	0.0212549	1	1	4.25949e-06	0.000418498
AT3G26590	-0.237081	0.581309	0.466024	-0.113384	0.880361	1.65772		1	1	1	1	0.201837	3.39976e-05
AT3G26600	1.1143	0.699929	0.402868	0.362913	1.30902	1.36536		0.0819216	0.69144	1	1	0.00144751	0.000330951
AT3G26830	2.90467	2.85434	1.17534	2.3727	4.47231	2.5735		6.05992e-06	2.91443e-12	0.873826	0.008468	2.31883e-25	1.40035e-05
AT3G26840	0.485884	0.460542	0.483976	0.225336	1.31426	2.09858		1	1	1	1	0.00101176	2.6507e-05
AT3G27210	0.015439	0.8267	0.739548	0.00581635	1.10215	1.76901		1	0.924497	1	1	0.115775	1.22554e-05
AT3G27690	-0.314291	-0.428887	-0.518613	-0.000984415	-0.81533	-2.31526		1	1	1	1	0.269052	1.54919e-06
AT3G28210	1.20717	0.992915	0.0714698	1.26342	1.3251	3.20444		1	1	1	1	0.250413	2.2374e-10
AT3G28340	1.05514	0.877603	0.472881	0.903542	0.68836	2.28677		1	0.70833	1	1	0.603763	2.75047e-08
AT3G28480	0.96059	0.821352	0.314483	0.2675	1.33489	1.10456		0.495053	0.348067	1	1	0.000689071	0.00275281
AT3G28510	3.53599	3.06593	1.99229	0	3.57179	4.41237		0.00119008	5.18082e-05	0.00637427	-	2.23412e-05	1.19082e-16
AT3G28540	1.59744	1.52687	0.975926	-0.15068	2.04565	2.45094		0.00017001	0.0379127	0.30782	1	0.000376151	7.89374e-12
AT3G28580	1.50363	2.92365	0.911783	0.638452	3.70687	2.77994		1	3.0813e-06	1	1	4.07121e-12	3.36026e-07
AT3G28890	0.0455312	2.24711	1.63276	-1.28888	2.05763	3.17968		1	0.00138832	0.176358	1	0.011539	3.96873e-12
AT3G28925	1.03419	0.829979	0.538033	0.411853	2.24003	1.4531		1	0.863876	1	1	2.54703e-05	0.00514442
AT3G28930	0.75762	0.889086	0.301174	0.135587	1.87067	1.14925		1	0.109498	1	1	4.54782e-08	0.00803551
AT3G29000	1.49582	2.32197	0.409403	1.23663	2.73228	1.62571		0.739759	0.000432234	1	1	9.52564e-07	0.0018284
AT3G29240	0.72604	0.771267	0.541115	0.531306	1.56905	1.96556		0.926981	0.253423	1	1	2.1388e-05	3.27661e-09
AT3G29575	0.781599	0.66375	0.159177	0.575529	0.979145	1.70484		1	1	1	1	0.261785	0.00023116
AT3G44300	-0.127378	0.944278	1.35748	-0.559522	1.50798	4.82213		1	1	0.479835	1	0.0993258	1.61375e-13
AT3G44350	0.72187	0.460897	1.46827	0.458386	0.944878	3.3		1	1	1	1	0.747884	1.59693e-07
AT3G44400	0.400877	0.978929	0.715902	0.327434	0.975775	1.5797		1	0.153318	1	1	0.0512808	7.0514e-05
AT3G44630	0.501724	0.732439	0.402895	0.27766	1.21173	1.37489		1	0.546546	1	1	0.00339279	0.000849567
AT3G44720	0.849487	1.0684	0.580885	0.239126	1.62597	1.85912		0.825909	0.2083	1	1	0.00133425	7.88412e-06
AT3G44990	0.798209	-0.904245	-0.896877	0.364895	-1.21179	-1.79132		1	0.993127	1	1	0.149927	0.000333606
AT3G45040	0.314591	0.404167	0.729345	0.312906	0.934829	1.80949		1	1	1	1	0.0929453	3.62011e-06
AT3G45130	-1.79966	2.23411	2.37061	-2.04373	1.14366	3.76409		1	0.207847	0.224953	1	0.860875	1.66331e-07
AT3G45290	0.681475	0.74329	0.858915	0.35733	1.01286	1.7789		1	0.724916	1	1	0.0503255	8.4309e-05
AT3G45330	0	0.581871	0.429452	0	0.554452	2.31419		-	1	1	-	0.98673	0.000949737
AT3G45410	0.285063	0.665421	0.669279	-0.78104	0.729464	3.2178		1	1	1	1	0.910301	1.88765e-10
AT3G45620	0.885166	0.660137	0.320164	0.363459	1.21254	1.43561		0.399607	0.69144	1	1	0.00118626	0.000121791
AT3G45640	0.667298	0.745956	0.452721	0.623951	1.18706	0.970718		0.863568	0.530172	1	1	0.00077898	0.0169884
AT3G45860	2.84	2.42957	2.17083	2.1133	2.4053	2.90106		2.45574e-08	2.75476e-06	6.34677e-05	0.0225698	1.00533e-06	8.4375e-13
AT3G46080	0.601543	1.94929	0.872448	-1.27201	2.67616	4.76724		1	0.168515	1	1	0.00810212	7.54112e-18
AT3G46090	0.449787	1.94704	1.13496	0.325035	2.32548	2.8981		1	0.0604351	0.593896	1	0.00682956	1.57417e-12
AT3G46690	-1.05005	0.168573	0.625222	-0.125625	0.274543	2.63749		1	1	1	1	1	0.000151037
AT3G47480	2.54607	1.83406	1.44269	0.341976	2.76348	3.64484		8.53629e-06	0.0345243	0.0396141	1	1.00594e-05	5.98465e-15
AT3G47540	0.545141	0.527935	0.64346	0.470553	1.52483	2.73749		1	1	1	1	0.000120812	3.63872e-11
AT3G47780	-0.164184	1.45448	0.557805	-0.40603	1.16146	2.25647		1	0.118885	1	1	0.116128	3.16964e-05
AT3G47810	0.409418	0.515743	0.382966	0.233411	0.879495	1.17382		1	0.947711	1	1	0.0307877	0.000884963
AT3G48020	-0.388929	0.684819	0.164789	0.0790082	2.29472	2.73239		1	1	1	1	0.00349062	3.05846e-06
AT3G48080	2.37711	1.08171	0.799384	1.25841	1.81714	1.79811		0.000134467	0.224718	0.994712	1	2.23412e-05	5.3756e-06
AT3G48090	0.84959	1.06086	0.795833	0.366343	1.50206	1.7138		0.824867	0.0353898	1	1	6.33223e-06	2.28928e-07
AT3G48420	0.0315118	-0.20359	-0.275672	0.10259	-0.16157	-1.20609		1	1	1	1	0.99429	0.000345255
AT3G48630	0.941642	2.31072	0.987711	0.213093	3.33374	2.6793		1	0.000740917	1	1	1.6462e-09	1.07537e-08
AT3G48640	1.69734	2.11057	0.683135	0.758804	2.36701	2.37616		0.675772	0.00131053	1	1	2.14596e-05	6.77278e-05
AT3G48650	1.65077	2.12982	1.05918	0.594447	3.10822	2.64112		0.469558	0.000578479	1	1	2.76879e-10	1.96498e-07
AT3G48850	-0.16172	1.58424	1.22421	-0.365937	3.16665	3.21165		1	0.447054	1	1	4.1401e-06	6.10226e-07
AT3G49120	1.21709	1.12262	0.62041	0.258185	1.94692	2.70337		0.0926184	0.0541205	1	1	4.19811e-07	1.01463e-17
AT3G49340	0	1.58983	1.21232	0	2.71147	2.49286		-	0.551476	0.873826	-	0.00108147	3.91486e-06
AT3G49530	-0.0411899	0.938321	0.46338	-0.223011	1.17608	1.48384		1	0.239541	1	1	0.0139678	0.000175863
AT3G49780	0.86888	0.477341	0.493699	0.232891	1.17698	2.9455		0.924453	1	1	1	0.129678	2.426e-18
AT3G50280	0.357057	-0.127584	0.222423	-0.856827	1.0426	2.16493		1	1	1	1	0.586905	0.000105001
AT3G50470	1.96821	0.859576	0.396975	1.14932	1.63129	1.68212		0.0449585	1	1	1	0.0443841	0.000311358
AT3G50480	2.5605	1.98873	1.45649	1.45074	2.83569	3.00519		4.41885e-08	7.12708e-05	0.044366	0.109012	1.77713e-10	4.99643e-24
AT3G50490	0.779338	1.04487	0.470358	0	2.11601	2.4153		1	1	1	-	0.00332588	0.000620902
AT3G50560	-0.564234	-0.833261	-0.264844	0.27241	-2.17443	-0.884319		1	1	1	1	0.000821728	0.527024
AT3G50770	1.26997	2.62164	1.00577	0.185447	3.68225	2.74993		1	0.000402664	1	1	7.3004e-12	3.89127e-06
AT3G50810	0.37662	-0.200382	0.934683	-0.200341	0.941156	1.633		1	1	1	1	0.352726	0.000680314
AT3G51000	0.530508	0.553792	0.437084	0.390346	1.12195	1.48431		1	0.911439	1	1	0.00302653	1.90352e-05
AT3G51330	2.48313	2.01822	1.62776	0.841433	2.56081	3.0187		2.99587e-05	7.91885e-05	0.00144789	1	1.23183e-07	9.31767e-18
AT3G51430	1.18544	1.03351	0.6261	0.457498	1.68082	1.99776		0.0981145	0.0434236	1	1	2.94393e-07	5.96748e-08
AT3G51440	0.651377	1.35719	0.787306	-0.0963948	1.98076	2.07608		1	0.212952	0.962108	1	0.00214934	1.85348e-08
AT3G51660	0.379545	0.500361	0.187933	0.179531	1.04983	1.82136		1	0.984637	1	1	0.006197	2.62383e-07
AT3G51860	1.32075	2.92873	1.73618	0.243658	3.41237	3.80911		1	0.000138705	0.155112	1	3.22669e-05	2.61051e-09
AT3G51890	1.51369	1.24873	0.651506	0.760805	1.96999	1.53149		0.000154927	0.0252267	1	1	8.81505e-08	0.000385726
AT3G52400	0.822349	1.72264	0.823942	0.766512	2.06952	2.50959		0.859559	0.000517082	0.4867	1	1.03745e-06	1.02631e-09
AT3G52430	1.59146	1.71229	1.23007	0.34885	2.37665	2.77425		0.00674907	0.000149855	0.0851375	1	1.51068e-08	4.68159e-15
AT3G53065	0	0	0	0	0	3.72271		-	-	-	-	-	5.19452e-05
AT3G53150	0.330492	1.7371	1.72344	0	2.82698	4.10346		1	0.937968	0.993756	-	0.023839	1.74065e-11
AT3G53230	0.184073	0.296229	0.191856	0.323304	1.09682	1.95986		1	1	1	1	0.114659	0.000139622
AT3G54150	0.336194	1.63988	0.759475	0.418738	2.78981	2.10891		1	0.00702197	1	1	6.09303e-09	0.000103517
AT3G54640	0.64888	0.927117	0.541247	0.356868	1.84482	1.94698		0.905374	0.102977	1	1	2.46221e-08	3.72624e-07
AT3G54960	1.11809	1.14943	1.07666	0.331059	1.62428	1.83007		0.375309	0.051908	0.150719	1	0.0001422	1.82853e-06
AT3G55500	-1.10256	-0.859392	0.421063	-1.06576	-0.394792	-0.135776		1	1	1	1	0.974691	1
AT3G55790	0	0	0	0	0	3.50376		-	-	-	-	-	0.000312232
AT3G55910	0.420095	1.02125	1.27054	0.656966	0.218098	2.40563		1	1	1	1	1	0.000334948
AT3G55970	-1.59839	0.838283	-1.07731	-1.47444	1.70931	2.25698		0.67079	1	1	1	0.0289004	0.000120417
AT3G56170	0.173369	0.666949	0.689051	0.236342	0.866019	1.78136		1	0.872058	1	1	0.243037	3.70202e-07
AT3G56400	2.31972	1.05916	0.531421	1.3655	1.81158	1.97249		5.69594e-08	0.217049	1	0.108073	0.00012842	2.85867e-07
AT3G56891	-1.01309	0.920107	0.772256	-0.158309	1.52537	5.18381		1	1	1	1	0.736638	1.23891e-11
AT3G57240	3.89963	2.68134	1.70773	2.4593	2.67135	2.22101		3.04558e-14	5.77251e-07	0.00586124	0.00092316	1.05761e-07	3.18795e-07
AT3G57260	2.17587	3.44136	2.50135	0.118925	3.52554	4.05915		0.354685	7.12557e-10	8.91073e-08	1	2.08166e-09	5.90214e-31
AT3G57380	-0.622358	0	0.200358	0.457123	0	3.48189		1	-	1	1	-	7.20493e-05
AT3G57460	2.49424	1.64526	0.444436	1.04028	2.20048	1.95978		0.00854404	0.0357942	1	1	5.42579e-05	0.000140276
AT3G57950	0.00032901	2.19409	0.597136	-2.54822	2.45424	3.8		1	0.0190137	1	0.598994	0.00174275	4.25419e-08
AT3G58990	0.623097	-0.656638	-0.396399	0.0472229	-1.40619	-0.589413		1	0.885098	1	1	0.000535134	0.346458
AT3G59660	0.292315	0.78692	0.420441	0.100826	1.21524	1.21105		1	0.35137	1	1	0.000742122	0.0012562
AT3G59700	1.20376	0.999582	0.554645	-0.371211	1.09733	1.89867		1	0.781837	1	1	0.507359	0.000312721
AT3G60190	0.296648	0.519417	0.495699	0.103978	0.839537	1.27534		1	0.947449	1	1	0.0347271	0.000312721
AT3G60420	1.82385	1.75115	0.742354	0.930926	2.73266	2.33291		0.0030338	0.000432234	1	1	4.13793e-11	5.06047e-09
AT3G60450	0.992218	0.82792	0.673649	0.250906	1.32235	1.62199		0.573808	0.317208	1	1	0.00157057	0.000114728
AT3G60470	-0.278222	1.76845	0.657558	-0.353606	3.00206	2.13769		1	0.846658	1	1	0.00234248	0.000993108
AT3G60540	0.901674	1.9073	0.812937	-0.418517	2.05211	2.1953		1	0.00156091	1	1	2.8379e-05	3.32768e-06
AT3G60966	0	2.39	0.93573	0	2.98019	3.32242		-	0.0176844	1	-	0.00193494	1.50196e-10
AT3G61190	0.121535	1.48689	1.12619	-1.02797	2.00864	2.95482		1	0.193474	0.941315	1	0.0194218	3.50053e-09
AT3G61280	2.01999	1.47598	1.03278	0.994566	1.89703	2.16068		0.000992325	0.00833725	0.4867	1	1.20783e-05	1.41854e-08
AT3G61390	-0.0550751	1.80639	1.24308	0	1.86793	6.40579		1	0.723322	1	-	0.387956	1.64188e-23
AT3G61930	0	0	-0.428533	0	0	3.07689		-	-	1	-	-	0.000871885
AT3G61960	0.279707	0.494971	0.246129	0.288032	0.891889	1.28732		1	1	1	1	0.100305	0.000867096
AT3G62260	0.339652	0.309293	0.167985	0.4495	0.977042	1.99635		1	1	1	1	0.141965	0.000376228
AT3G62590	0.00485315	0.699882	0.389963	-0.178174	1.50189	1.76664		1	1	1	1	0.00558544	0.000584897
AT3G62600	0.972163	0.859565	0.640255	0.30154	1.23411	1.56814		0.162615	0.169919	1	1	0.000297045	0.000227004
AT3G63010	0.258005	0.199623	0.247095	0.0017964	1.11109	2.29776		1	1	1	1	0.12563	6.99565e-05
AT3G63380	0.783221	1.70155	1.12812	1.10323	2.97287	3.36126		1	0.00205978	0.539288	1	1.70303e-11	2.59129e-10
AT4G00700	1.94359	3.19051	1.8338	0.646344	3.7655	3.78887		1	1.25826e-06	0.0239629	1	7.12955e-12	1.47158e-12
AT4G00955	0.413002	0.905196	0.676714	-0.249056	1.42059	1.7123		1	0.912889	1	1	0.03594	0.000246816
AT4G01010	0.530163	1.70672	0.735963	0.338293	1.91153	2.23644		1	0.00472998	1	1	0.000297612	2.62383e-07
AT4G01070	0.198534	0.323586	0.055723	-0.221625	0.790064	1.24314		1	1	1	1	0.144887	0.000626855
AT4G01430	0.092868	-0.0594959	0.736635	0.101013	0.481211	2.45411		1	1	1	1	0.947285	4.08862e-05
AT4G01480	0.556568	0.241021	0.478505	0.0387058	0.544151	1.43147		1	1	1	1	0.57948	0.000136997
AT4G01540	-0.712749	1.21672	-0.275396	-1.07016	1.17634	2.21994		1	0.804962	1	1	0.453544	7.10562e-05
AT4G01610	0.533462	0.799162	0.496643	0.223326	1.12719	1.54605		1	0.258741	1	1	0.00131957	1.40986e-05
AT4G01720	0.143098	1.0189	0.789307	0.125644	1.29286	1.62077		1	0.273339	1	1	0.0131184	0.000107981
AT4G01750	0.511971	1.1785	0.500189	0.206128	1.5785	1.34824		1	0.0393165	1	1	0.00028691	0.0020771
AT4G01870	-0.00278681	0.584199	-0.652636	0.616549	1.8112	1.08847		1	1	1	1	0.000475392	0.107158
AT4G02050	0.394177	0.70294	0.43692	0.359459	0.872512	1.524		1	0.881281	1	1	0.143519	1.97209e-05
AT4G02380	1.31776	1.39609	0.785895	0.953776	2.36536	1.75611		0.0749014	0.00319075	1	1	7.1027e-08	8.69138e-05
AT4G02520	2.12628	1.928	1.09121	1.25031	3.05389	2.66315		4.07954e-06	1.20953e-05	0.224953	0.332458	4.77366e-16	4.34704e-10
AT4G03320	0.343453	0.0794275	0.277331	-0.37318	0.749797	2.13358		1	1	1	1	0.593585	0.000145122
AT4G03450	3.69226	2.0171	1.3047	1.75008	2.70113	3.19328		8.10516e-08	0.000762567	0.0389583	1	2.58881e-07	5.39795e-20
AT4G04220	1.58098	1.5201	0.427515	0.504621	2.28064	1.39309		0.099926	0.0930381	1	1	7.08245e-05	0.00502076
AT4G04490	1.59154	2.15677	0.673621	0.19761	2.54581	2.21274		0.335745	0.00166258	1	1	9.64892e-07	0.00354945
AT4G04500	1.64678	2.90133	1.26485	1.07508	3.2616	3.17164		1	3.92459e-05	0.702528	1	3.71097e-05	4.25962e-09
AT4G04510	1.24241	2.07617	2.04755	0.369212	2.43895	3.94592		1	0.0185134	0.07885	1	0.00125411	7.85375e-12
AT4G04620	-0.152669	-0.0235149	0.334953	-0.139166	0.457419	1.69909		1	1	1	1	0.720994	0.00043617
AT4G04960	0.35562	0.461804	0.805358	0.579212	0.811528	1.94673		1	1	1	1	0.322713	1.37467e-05
AT4G05020	0.7596	1.20728	0.445756	0.0181393	1.66809	1.71191		1	0.25463	1	1	0.000535134	2.32963e-05
AT4G05030	0.933607	1.18476	0.485332	-0.448593	2.20275	3.1353		1	1	1	1	0.0118418	5.33203e-07
AT4G05590	-0.38928	0.455661	0.670587	-0.186786	0.667507	1.6912		1	1	1	1	0.534985	2.89965e-06
AT4G08230	0.261922	0.681071	0.468185	0.0941253	0.932197	1.51253		1	0.746694	1	1	0.0287173	7.89335e-05
AT4G08290	0.628479	0.359004	0.870392	0.511787	0.593272	1.68126		1	1	1	1	0.479264	0.000550659
AT4G08770	-1.13233	1.40315	0.689435	-0.661388	2.88785	2.47168		1	0.457135	1	1	0.000263389	3.79724e-05
AT4G08780	-0.719777	0.665725	0.626929	-0.329026	1.8061	1.84192		1	1	1	1	0.0343269	8.18072e-05
AT4G08850	0.842762	0.952622	0.629486	0.488884	1.14495	1.54524		0.269701	0.147623	1	1	0.00684455	3.33394e-05
AT4G09750	1.00516	0.400327	0.185258	0.740987	0.741044	1.38511		0.319198	1	1	1	0.35362	0.000431247
AT4G10500	1.79531	3.9628	2.21742	-0.434119	4.18928	4.35666		0.898706	4.557e-08	0.000983451	1	3.90573e-07	1.53815e-19
AT4G10860	0	4.47325	1.82198	0	3.68441	6.21239		-	2.03344e-10	0.0196743	-	6.64093e-06	1.26271e-34
AT4G11170	0	1.34796	-0.169553	0	2.95204	2.96125		-	0.630802	1	-	2.26662e-05	1.81222e-07
AT4G11280	0.244567	0.877644	0.319391	0.123215	1.79907	1.36602		1	0.359508	1	1	1.31461e-05	0.00482434
AT4G11340	-1.59833	0.578048	0.465429	-1.37117	0.386599	3.29253		1	1	1	1	1	8.68988e-09
AT4G11370	0.409091	1.49996	-0.249627	0.048637	2.24906	0.368648		1	0.0937801	1	1	0.000184166	0.774477
AT4G11650	-1.39366	0.472615	0.270983	-1.19009	1.85141	4.36791		1	1	1	1	0.0539778	4.37341e-09
AT4G11655	1.00146	2.56878	1.39306	0	3.39557	5.37229		1	0.024142	1	-	2.82199e-05	9.65469e-18
AT4G11840	1.48989	0.995568	0.525046	0.755251	1.41211	1.19645		0.0279062	0.439325	1	1	0.000590591	0.00295104
AT4G11850	1.18196	0.958761	0.384718	0.3463	1.37668	1.05479		0.0828451	0.114755	1	1	6.42657e-05	0.00517643
AT4G11890	2.3896	2.3561	1.43848	0.572133	2.97643	2.68962		5.66125e-05	0.00011594	0.0389583	1	7.1027e-08	3.33966e-14
AT4G11910	0.197585	2.00811	1.35782	0.293636	2.51536	3.39748		1	0.371674	0.853353	1	0.0123211	1.95581e-09
AT4G12120	-0.117438	0.936568	0.572765	-0.13108	1.40783	1.8369		1	0.616178	1	1	0.0177285	3.83101e-05
AT4G12290	0.542728	0.669533	0.501508	0.328398	1.28744	2.08953		1	1	1	1	0.0805778	0.000120535
AT4G12480	1.2889	0.401628	0.627639	0.614495	1.66287	2.61855		1	1	1	1	0.014519	1.04711e-08
AT4G12490	2.30127	1.7641	1.391	1.72003	2.65614	4.17474		0.0417035	0.0738527	0.515674	0.981272	0.00046858	1.426e-14
AT4G12500	1.50943	1.61407	1.42022	0.95268	1.98409	3.63559		0.491506	0.0486311	0.0115577	1	0.00049414	1.69e-22
AT4G12720	0.713866	1.53904	0.728471	0.261368	2.2529	2.05976		0.926981	0.000196708	1	1	3.92567e-11	3.81268e-07
AT4G13410	0.00513265	-0.465381	-0.77432	-0.0543781	-0.421739	-2.06939		1	1	1	1	0.850159	2.20455e-05
AT4G13510	0.907731	0.692822	0.327978	0.456949	1.27753	1.20522		0.488979	0.714652	1	1	0.000851148	0.00305494
AT4G13575	-0.366551	-0.750832	-0.214975	-0.376741	-1.08843	-1.76766		1	1	1	1	0.250413	0.000638587
AT4G13810	0.310303	1.41063	0.67037	-0.0380569	1.57214	1.58938		1	0.00472998	1	1	6.67439e-05	0.00090383
AT4G13890	0	3.53347	2.09916	0	2.82772	3.32509		-	0.00056718	0.220657	-	0.0260021	6.71436e-07
AT4G13900	0.98391	1.74763	1.07892	-0.249697	2.1356	2.37936		1	2.48973e-05	0.386025	1	2.08154e-09	1.99263e-09
AT4G14365	2.04782	2.13438	1.16208	1.06617	2.75138	2.35623		0.000843786	5.81037e-06	0.0672415	1	2.83237e-10	4.97948e-13
AT4G14370	0.060032	1.73913	1.41058	0.102841	1.88954	3.22528		1	0.217264	0.701799	1	0.053159	1.62422e-08
AT4G14390	1.76981	1.83994	2.23458	-1.2573	2.30223	3.49244		1	0.0557273	0.0671851	1	0.00293392	2.20112e-08
AT4G14400	2.63309	1.18338	0.435235	1.45718	1.67668	0.997131		3.95903e-09	0.327415	1	0.0329071	0.00647248	0.0515684
AT4G14403	2.89716	1.49378	0.546664	1.58652	2.19337	1.27903		1.88853e-06	0.114755	1	0.990869	0.000373569	0.176922
AT4G14630	1.15965	3.64607	1.76012	0	3.6876	6.99346		1	3.0813e-06	0.155112	-	1.19347e-07	3.42389e-31
AT4G14746	-0.0199831	0.868892	0.999319	0.17317	1.22564	1.62172		1	0.491463	0.386544	1	0.0221618	5.42437e-05
AT4G15270	0	0.480021	1.8318	0	0	3.45178		-	1	1	-	-	6.5481e-05
AT4G15280	0	0	-0.122785	0	0	2.81881		-	-	1	-	-	0.00010287
AT4G15417	0.170239	0.343959	0.520357	0.406214	0.483432	2.49864		1	1	1	1	0.942286	0.000517022
AT4G15530	0.903532	1.19005	0.47774	0.377043	1.78265	2.19435		0.378696	0.0274028	1	1	4.52418e-06	3.16428e-06
AT4G15610	0.301543	0.928893	0.74126	-0.559523	1.58464	3.65479		1	1	1	1	0.16282	5.97105e-05
AT4G16000	0.113442	0.680165	-0.0188227	0.542204	1.44814	0.702074		1	0.802006	1	1	0.000176891	0.17454
AT4G16260	-2.64684	1.39664	-0.325663	-2.2588	4.05559	2.10085		0.183144	0.0224568	1	0.868118	8.5934e-14	0.0108846
AT4G16660	0.775255	0.821303	0.806106	0.253438	1.04345	1.50952		0.746306	0.332438	0.962108	1	0.0100944	0.000430245
AT4G17670	0.394732	0.481588	0.663253	-0.201518	0.580426	2.01184		1	1	1	1	0.590959	1.51168e-07
AT4G18430	0	1.8512	1.80159	1.18415	2.78667	4.23534		-	0.041069	0.150449	1	2.06489e-05	6.78491e-14
AT4G18440	0.523517	-0.441176	-0.787315	-0.00815936	0.0703713	-1.78429		1	1	1	1	1	9.76004e-05
AT4G18930	0.271843	0.575015	0.289004	0.234389	0.726514	1.47636		1	0.895473	1	1	0.232558	1.85694e-05
AT4G19370	0.554275	1.66348	0.372205	0.541723	3.07042	1.92633		1	0.100097	1	1	6.13091e-06	0.000617074
AT4G19970	0.659203	1.26774	1.09473	-0.251634	1.64885	3.48246		1	0.364491	0.688119	1	0.0313236	3.33966e-14
AT4G20110	1.90726	1.46258	0.626565	0.836318	2.332	2.56696		0.00785201	0.00650565	1	1	1.6706e-09	1.19563e-09
AT4G20460	0.345006	0.287111	1.67277	-0.0687042	0.447894	2.34182		1	1	0.269322	1	0.934503	0.000517384
AT4G20830	0.72641	0.924633	0.555211	0.486604	1.60959	1.32201		0.692643	0.175644	1	1	2.0974e-05	0.00353948
AT4G21120	1.05874	1.35561	1.01538	1.45573	1.94071	3.38907		1	0.110417	1	1	0.000106075	2.8687e-11
AT4G21380	1.5964	0.934921	0.3541	0.709132	1.21866	1.07029		0.000377371	0.561748	1	1	0.0526908	0.0313813
AT4G21730	0.62233	0.948689	1.01349	0.125871	1.6157	2.51149		1	0.983143	1	1	0.0560018	4.80234e-06
AT4G21840	2.41642	2.42168	1.402	0.322643	2.94052	3.28314		0.0980039	0.000897696	0.167122	1	1.55785e-05	3.39497e-14
AT4G21850	0.16889	1.31253	0.659449	0.227012	1.79854	1.51767		1	0.0649205	1	1	9.05135e-05	0.00141366
AT4G21870	-0.650615	-0.761876	-0.703341	0.0517267	-0.710935	-2.38535		1	0.689285	1	1	0.649794	6.35655e-06
AT4G21903	1.30782	1.40609	1.0603	0.180922	1.73443	2.34324		1	0.157364	0.941315	1	0.00313204	5.30772e-06
AT4G21980	0.293688	0.655134	0.521134	0.276376	0.895267	1.6259		1	0.593119	1	1	0.0336201	2.77715e-06
AT4G22070	0	1.15312	0.0979997	0	0	3.90571		-	1	1	-	-	5.77272e-10
AT4G23140	2.34402	2.71156	2.26877	0.839116	2.72983	3.3918		0.036675	1.2915e-07	1.05733e-07	1	9.9491e-07	7.31783e-20
AT4G23150	2.46168	3.69443	2.17412	0.807462	4.32111	3.76148		0.00783189	1.05693e-06	0.000429772	1	9.7624e-10	9.50815e-15
AT4G23160	-0.00886888	1.97519	1.56698	-0.123475	1.52738	2.61102		1	0.0359549	0.4867	1	0.246682	2.74062e-05
AT4G23170	2.27828	1.15316	0.43918	1.13809	1.4717	1.1501		5.47031e-07	0.148687	1	0.62799	0.00360495	0.0164955
AT4G23200	0.200396	0.432934	0.689028	-0.193599	0.353224	1.78762		1	1	1	1	0.834531	1.37467e-05
AT4G23210	1.04149	1.48208	0.793523	0.409562	2.0071	2.99384		0.661555	0.155761	1	1	0.000704123	3.32227e-10
AT4G23215	1.73206	1.4961	-0.261034	1.30928	1.99058	1.73715		0.940934	0.12476	1	1	0.0136731	9.79394e-05
AT4G23220	1.38199	1.71305	1.25893	0.382313	2.30307	2.10251		0.041256	0.000172822	0.306199	1	2.08166e-09	6.26947e-06
AT4G23230	2.11362	1.6107	1.06773	1.89003	2.34186	2.33901		0.0981145	0.0154161	0.472759	0.986545	8.15134e-07	9.81648e-09
AT4G23250	0.670428	0.821488	0.220034	-0.00573496	1.57456	0.895749		1	0.749876	1	1	0.000622867	0.061801
AT4G23310	1.51962	3.82347	2.10381	0.0478458	3.40049	3.81647		1	4.46719e-08	0.00348786	1	1.34903e-06	2.57753e-17
AT4G23320	1.58945	1.6196	1.10676	1.14342	2.61192	2.37762		1	0.315276	1	1	0.00065236	4.40011e-05
AT4G23470	0.878835	0.865957	0.627229	0.523052	1.16825	1.25884		0.227997	0.122542	1	1	0.000697366	0.00119342
AT4G23570	0.744664	0.597833	0.278148	0.390634	1.2769	0.764162		0.657214	0.922792	1	1	0.000479552	0.12306
AT4G23610	2.35202	2.1813	1.27439	1.69655	2.53612	2.90117		0.0268004	0.000185982	0.407682	1	8.54149e-06	1.14126e-10
AT4G23700	0.026064	2.49687	1.21263	-0.790912	3.32696	3.70769		1	0.0117158	0.269322	1	2.80859e-08	1.6017e-13
AT4G24000	0	0	0	0	0	4.20031		-	-	-	-	-	1.45351e-07
AT4G24190	0.692894	0.910299	0.795836	0.047587	1.19689	1.48791		0.750901	0.0842657	0.936578	1	0.000670056	0.000234806
AT4G25070	1.37723	2.73887	1.85494	0.372498	3.19574	2.99509		1	4.2904e-05	0.00234049	1	7.36071e-09	3.10945e-12
AT4G25110	1.28915	1.5487	1.00788	0.79632	1.94172	1.71794		0.383414	0.000889125	0.593896	1	1.19872e-05	4.98466e-05
AT4G25390	-0.100753	0.249797	0.174328	-0.0282916	0.967696	1.96706		1	1	1	1	0.523289	0.000839382
AT4G25810	-0.938171	1.35418	0.897576	-0.413403	1.00813	2.71767		1	0.229701	1	1	0.479264	1.26223e-08
AT4G25900	0.76054	0.831124	0.505097	0.280851	1.38431	1.3921		0.523365	0.208129	1	1	5.44685e-05	0.000241333
AT4G26060	0.805951	1.16153	0.840597	0.105754	1.99396	1.87949		1	0.0956923	0.986398	1	1.94492e-06	1.47819e-05
AT4G26120	1.22393	2.00234	1.23753	0.694702	2.01611	2.61458		1	0.0315859	0.786953	1	0.0215604	3.40023e-07
AT4G26270	1.19525	1.01086	0.874692	0.0732824	1.65902	1.9875		0.174396	0.153438	1	1	0.000214302	3.64151e-06
AT4G26990	0.203352	0.893415	1.13421	0.46087	0.914123	2.41754		1	1	0.702528	1	0.453225	7.99126e-07
AT4G27280	0.7212	1.25458	0.562052	0.538236	1.82188	1.66978		1	0.0706525	1	1	4.46009e-05	0.00026544
AT4G27740	0.95445	0.807805	0.611796	0.539013	1.18605	1.45821		0.424325	0.359508	1	1	0.00528283	0.000367899
AT4G28270	0.97351	1.09943	0.810992	0.413096	1.54033	1.61458		1	0.195389	1	1	0.000617746	0.000680307
AT4G28390	1.12619	2.00881	1.88305	0.547016	2.56928	3.69085		1	0.00972488	0.0107284	1	2.89655e-05	1.24534e-15
AT4G28490	1.2226	0.934113	0.502701	0.568542	1.55519	1.95267		0.337185	0.484662	1	1	0.0011602	0.000150758
AT4G29810	0.804878	0.962009	0.502282	0.197763	1.37667	1.18079		0.454296	0.148687	1	1	0.000236932	0.00309574
AT4G29850	0.472031	0.512557	0.864614	0.389234	0.767401	2.6409		1	1	1	1	0.763895	2.323e-06
AT4G29900	0.450726	0.860037	0.522019	0.129174	1.41779	1.31693		1	0.161843	1	1	1.65699e-05	0.000933919
AT4G30230	-0.395166	0.587589	0.73062	-0.570251	0.511659	2.32378		1	1	1	1	0.925643	5.29771e-05
AT4G31500	0.340111	0.896378	0.345886	0.137618	1.14955	0.939313		1	0.108911	1	1	0.000747491	0.0218602
AT4G31800	0.931889	0.684499	0.469622	0.145701	1.44062	2.46569		0.791782	0.948925	1	1	0.00417138	4.9014e-13
AT4G33050	0.969578	1.2067	0.679426	0.285525	1.93279	1.69588		0.168475	0.0256106	1	1	3.08038e-07	6.9026e-06
AT4G33920	-0.0625843	0.723003	0.362561	0.0403364	0.544783	1.47061		1	0.915279	1	1	0.668157	0.000404728
AT4G34150	0.298406	1.00228	0.404732	0.119297	1.51828	1.8093		1	0.293296	1	1	7.21275e-05	0.000161535
AT4G34180	0.27256	0.704853	0.337436	0.182835	1.31232	1.56602		1	0.418408	1	1	0.000519394	3.39879e-05
AT4G34230	-0.185184	0.563784	0.179631	-0.135276	1.11334	1.65767		1	0.98954	1	1	0.00943058	0.000986422
AT4G34380	-0.170096	1.1869	1.70803	0	1.29545	4.08136		1	1	1	-	0.526947	6.6536e-08
AT4G34390	0.530132	1.04436	0.496491	0.2286	1.26778	1.94627		1	0.0956923	1	1	0.00132033	5.65356e-07
AT4G35110	-0.265422	1.67997	1.01162	0.189428	2.62484	2.55931		1	0.00827097	0.826583	1	4.09372e-09	7.36623e-06
AT4G35170	1.43427	0.869989	0.163293	-0.76434	1.99554	2.50332		1	1	1	1	0.114577	4.04519e-05
AT4G35180	1.70616	1.43834	1.20104	-0.24991	2.59885	2.70829		0.438851	0.0995786	0.386544	1	9.69106e-07	1.87777e-08
AT4G35320	-0.283704	-0.830482	0.0525799	-0.167946	-1.60958	-0.518146		1	0.327415	1	1	0.000100667	0.522282
AT4G35380	-0.242792	0.455743	2.08796	0.362861	1.24106	3.19725		1	1	0.679046	1	0.627567	0.000347246
AT4G36110	0.610997	0.469209	0.920964	1.11331	0.328953	2.09395		1	1	0.970596	1	0.98673	3.74829e-06
AT4G36988	0.344759	1.45929	1.15697	0.00504296	2.12817	3.39772		1	0.0201772	0.0403361	1	7.88632e-06	5.39795e-20
AT4G37010	0.527437	1.11841	0.988963	-0.442633	2.21711	3.26699		1	0.983787	1	1	0.00772817	5.78811e-11
AT4G37150	0.352356	0.24801	-1.00411	-0.344009	0.69703	2.2117		1	1	1	1	0.783927	0.000186808
AT4G37290	0.0222839	2.61046	-0.0166066	-0.601946	3.87113	1.69062		1	0.0267779	1	1	1.16414e-06	0.101451
AT4G37370	0.836809	0.865642	-2.00683	0.0295536	2.4392	-0.812699		1	1	1	1	8.97019e-05	0.788567
AT4G37390	0.0314966	-0.616908	0.32548	0.513929	-0.0715442	2.29932		1	1	1	1	1	1.56781e-05
AT4G37520	0.0751159	0.856853	0.964816	0.356029	1.71102	3.0715		1	0.779663	0.426186	1	0.00122584	4.02915e-11
AT4G37530	0.557741	0.98087	0.865227	0.407524	1.92581	2.80204		1	0.377154	0.961292	1	1.36429e-05	6.29158e-11
AT4G37990	-0.259862	1.41371	-0.566459	0	2.58712	3.74836		1	1	1	-	0.00011013	8.64808e-17
AT4G38560	1.50061	1.95668	0.830228	0.871614	2.40363	2.46207		0.559256	0.00390332	1	1	2.41034e-05	2.35788e-07
AT4G39030	0.901006	1.1183	0.305475	0.517636	1.85665	1.68169		0.832947	0.0975369	1	1	2.24314e-06	0.000448262
AT4G39250	-1.41493	-1.34535	-0.795905	-0.0350665	-1.19185	-3.94151		0.832152	0.503131	1	1	0.482233	5.19502e-06
AT4G39390	0.485756	0.242724	0.445157	-0.0501347	0.301773	1.38457		1	1	1	1	0.925643	0.000588742
AT4G39404	0	0	0	0	1.51962	3.82225		-	-	-	-	0.736622	3.84067e-05
AT4G39670	1.5013	1.42149	0.384149	0.183795	2.3453	2.85834		1	0.19429	1	1	2.86873e-05	1.41854e-08
AT4G39830	1.55016	1.78692	1.96561	0.74294	1.96314	3.37681		0.954166	0.00929041	0.00817203	1	0.000675043	4.57255e-14
AT4G39890	0.877007	1.16769	0.585695	1.27496	1.77949	1.32991		1	0.272324	1	1	0.000524543	0.0192484
AT4G39950	0.283366	1.0871	0.267484	-0.0429406	1.46063	2.13449		1	0.021995	1	1	1.63378e-05	1.01349e-07
AT4G39955	-0.101778	0.00791703	0.238406	-0.549493	0.650815	2.18357		1	1	1	1	0.74835	6.64124e-06
AT5G01380	-2.30522	0.113038	0.194832	-1.95982	1.02237	3.70413		0.863798	1	1	1	0.859	1.81535e-06
AT5G01540	0.97818	1.41362	0.980022	0.327609	1.83175	2.26581		0.495048	0.158187	0.963521	1	0.00728391	1.21322e-06
AT5G01550	-0.317472	1.21995	0.453387	-0.417673	1.65237	2.29952		1	0.913094	1	1	0.111241	0.000120417
AT5G01640	0.732635	0.999868	0.423608	0.516626	0.622066	3.29413		1	1	1	1	0.901816	0.000144319
AT5G01820	0.458995	0.383392	0.433533	0.393347	0.692282	1.5022		1	1	1	1	0.27752	0.000620894
AT5G01850	1.12744	0.832611	0.646297	0.318543	1.11676	1.88055		0.778369	0.736821	1	1	0.0518992	1.81444e-05
AT5G01900	3.04533	0.982058	1.38143	0.349181	1.36142	2.65785		0.0529534	1	0.702528	1	0.340127	5.97508e-07
AT5G02020	0.396535	0.770024	0.93817	0.43877	1.4944	2.11766		1	1	1	1	0.113344	3.76525e-06
AT5G02490	0.931203	1.50395	1.19009	0.423496	2.52059	2.90926		0.600893	0.00358326	0.044366	1	1.20004e-13	1.81444e-16
AT5G02780	1.15602	2.4758	1.1896	0.256618	3.1278	3.05169		1	0.0052629	0.423653	1	2.24314e-06	5.81602e-12
AT5G03120	-0.464728	-0.972868	0.106449	-0.183826	-1.8516	-1.02926		1	0.169553	1	1	3.33502e-06	0.0358877
AT5G03210	1.55766	2.69971	0.81386	0.130125	3.12429	2.91983		1	0.111017	1	1	0.000935529	1.65222e-09
AT5G03350	2.87463	1.1917	0.636063	1.06207	1.49264	1.50443		6.40852e-10	0.208039	1	0.775134	0.012661	8.54313e-05
AT5G04720	0.713901	0.884948	0.564767	0.363922	1.26302	1.69442		0.976511	0.28286	1	1	0.00122227	1.90352e-05
AT5G04930	0.822651	0.935902	0.693456	0.309626	1.41284	1.64514		0.433537	0.149603	1	1	0.000164605	3.9707e-06
AT5G05340	1.53555	2.25804	0.758588	-0.134147	2.36344	3.17177		1	0.0116438	1	1	0.000458314	1.49095e-08
AT5G05460	1.8047	1.94319	0.821487	0.785278	2.11745	1.66473		0.00270181	5.33714e-05	1	1	7.19835e-07	6.79838e-05
AT5G05730	0.383446	0.750141	0.362527	0.240774	1.47186	1.24065		1	0.314787	1	1	3.40518e-05	0.0153572
AT5G05890	-0.499289	-0.951891	-1.34969	-0.0385935	-1.75615	-2.34437		1	0.354431	0.273832	1	0.01628	3.61369e-05
AT5G06310	0.603249	0.874002	0.546906	0.458308	1.13726	2.09876		1	0.546198	1	1	0.0298776	2.40741e-05
AT5G06320	0.607048	0.86661	0.627318	0.305661	1.20292	2.39563		1	0.204392	1	1	0.00219331	3.13972e-13
AT5G06730	-0.942166	0.981263	2.30361	-0.713014	0.494209	3.3578		1	1	0.306199	1	1	0.000168062
AT5G06750	0.686822	0.929	0.549503	-0.0615261	1.33539	1.73949		1	0.384238	1	1	0.00535498	1.82717e-06
AT5G07770	0.777245	1.28693	0.897891	0.337207	1.59882	1.34114		1	0.0323881	0.876587	1	6.70484e-05	0.00780934
AT5G08240	0.342241	1.95169	0.831684	-0.236026	2.77561	2.49883		1	0.000732431	1	1	1.51068e-08	5.91431e-11
AT5G08380	0.821852	0.720098	0.368773	0.228937	1.19133	1.4588		0.519189	0.622818	1	1	0.00354405	5.54141e-05
AT5G08760	2.39908	1.25059	0.982984	1.10617	1.46666	1.9695		8.93284e-05	0.0460508	0.199298	1	0.000910471	6.27114e-09
AT5G09290	0.436102	2.1656	1.16823	-0.379006	2.99239	3.37033		1	0.00246767	0.64822	1	3.52054e-07	2.09472e-13
AT5G10380	1.27713	2.39426	1.60339	0.334332	2.56777	2.80143		0.309789	0.00086776	0.00121096	1	0.000211583	1.14938e-15
AT5G10695	1.45371	1.34172	0.814558	1.13524	1.94503	2.69138		0.336999	0.68966	1	1	0.0367103	3.98975e-10
AT5G10750	-0.204392	0.602884	0.864303	-0.430801	0.627948	1.70753		1	0.972291	0.941315	1	0.439335	8.41165e-05
AT5G10760	2.73509	2.91578	2.11832	0.910941	2.87089	3.23177		0.000572126	1.42853e-05	9.77013e-06	1	5.75168e-05	3.27247e-18
AT5G11650	0.194945	0.756398	0.446215	-0.136748	1.16107	1.75489		1	1	1	1	0.0622013	0.000110214
AT5G11920	0.965872	3.3658	1.72748	-0.330702	3.66773	3.37399		1	3.10763e-08	0.0419048	1	2.83237e-10	1.52608e-11
AT5G12930	0.731856	1.4414	0.283449	0.527575	1.57686	1.69296		1	0.0252161	1	1	0.00484971	0.000503726
AT5G13080	-0.943243	2.77079	1.30831	-0.129377	3.77472	4.05221		1	0.00105246	1	1	7.07099e-08	1.86645e-10
AT5G13190	0.465126	0.94161	0.581146	0.433118	1.52328	2.19096		1	0.150382	1	1	8.18844e-06	5.84433e-08
AT5G13200	0.281473	1.04376	0.0845289	-0.186986	1.33706	1.83337		1	1	1	1	0.408141	0.000702679
AT5G13320	0.728065	2.0805	0.938782	-0.317222	2.97394	3.44266		1	0.025637	0.941315	1	7.12195e-06	8.4375e-13
AT5G13330	-0.940322	1.12677	0.912721	-0.805258	0.939663	2.76205		1	1	1	1	0.718373	2.26193e-06
AT5G14930	0.619795	0.612345	0.752083	0.289841	0.731401	1.53627		1	0.899039	0.859616	1	0.227609	1.85252e-05
AT5G15130	-0.640376	0	0.0937586	-0.44055	0	2.99775		1	-	1	1	-	0.000399972
AT5G15860	0.401696	1.36286	0.955567	0.0319816	1.55975	2.17493		1	0.0170231	0.97941	1	0.000908685	6.16328e-06
AT5G15870	0.880105	0.873449	0.609275	0.857808	1.25771	2.96394		1	0.622818	1	1	0.0277707	1.49088e-11
AT5G16080	0.403229	0.26564	0.337512	0.00283794	0.663959	1.71828		1	1	1	1	0.5136	0.000176519
AT5G16170	1.6292	1.00907	0.709118	1.42912	2.13168	2.19162		0.337185	0.935492	1	1	0.000596611	0.000127913
AT5G17330	-0.396706	0.985617	1.53686	-0.275445	1.37524	4.21824		1	1	0.176798	1	0.264592	9.29277e-19
AT5G17760	1.59397	1.6077	1.02572	0.408229	2.13127	2.63773		0.126546	0.0124432	0.595005	1	5.42942e-05	2.2389e-11
AT5G17860	-1.12287	0.630639	0.0199885	-0.375469	1.75984	1.92409		1	1	1	1	0.000622306	0.000504022
AT5G17990	0.458161	0.655497	0.376387	0.153875	1.37028	1.39951		1	0.604206	1	1	6.70132e-05	4.64936e-05
AT5G18310	0.345902	0.55034	0.398239	0.0664767	0.859808	1.69249		1	0.990363	1	1	0.0695196	2.87276e-06
AT5G18350	-0.10964	-0.666754	1.06441	-0.84221	0.955387	3.04118		1	1	1	1	0.795464	0.000150758
AT5G18362	0.215496	0.566714	0.961847	0.613631	1.02806	2.36371		1	1	1	1	0.321278	1.50015e-06
AT5G18470	1.28644	1.92598	1.09282	0.362784	2.85176	2.04714		0.0926184	3.55358e-06	0.0875695	1	2.83578e-15	2.18089e-09
AT5G18780	0.288762	0.55407	0.536924	-0.0167004	0.900733	1.82996		1	1	1	1	0.451539	0.000120338
AT5G19230	0.287342	0.802919	0.225436	0.240413	1.66058	1.13507		1	0.603095	1	1	9.92374e-05	0.0224865
AT5G19240	2.12867	1.35453	0.749807	0.90567	2.0006	1.82899		9.61373e-08	0.0251847	0.826583	1	9.69106e-07	1.31649e-07
AT5G19875	1.09258	1.59351	0.591315	0.596671	1.72445	2.28063		1	0.363974	1	1	0.083578	8.07803e-07
AT5G19880	0.192396	1.48611	1.78043	0	1.97769	3.90864		1	0.967131	0.450139	-	0.330379	2.87191e-10
AT5G20230	1.14168	1.83929	0.901617	0.951857	2.61154	2.84303		0.523365	0.0182297	0.476681	1	2.13822e-05	2.62731e-10
AT5G20790	-0.206222	-0.76164	0.874813	-0.32325	0.933786	2.4921		1	1	1	1	0.580159	2.002e-05
AT5G20960	0.211218	0.62418	0.844011	0.290156	1.53019	2.36898		1	1	0.958301	1	0.000299892	1.41375e-08
AT5G21090	0.281031	0.688529	0.678977	0.0999452	1.00989	1.56296		1	0.415104	0.971652	1	0.00224499	4.21255e-06
AT5G21900	0.524121	0.618879	0.463693	0.0530839	0.683821	1.76539		1	1	1	1	0.543267	0.000130332
AT5G22380	1.04156	2.35603	1.29587	0.638235	3.28	1.70671		1	0.00937374	0.913921	1	2.02242e-06	0.00870388
AT5G22520	0.843017	2.59103	0.150659	0.0684145	3.32938	1.65754		1	0.00011594	1	1	1.8228e-09	0.000489715
AT5G22530	0.742334	2.25497	0.977753	0.527658	3.20522	2.28882		1	0.00702197	1	1	1.04553e-07	2.90786e-05
AT5G22540	0.207998	0.825911	1.03364	0	1.98243	2.43162		1	1	1	-	0.073291	6.50955e-06
AT5G22545	1.38041	0.114537	1.47448	0	1.56291	2.86018		1	1	0.861664	-	0.0538967	5.0207e-06
AT5G22570	4.69456	2.2303	1.42246	1.88304	2.60365	3.40286		2.56501e-07	0.000290367	0.078493	1	2.89655e-05	1.24534e-15
AT5G24090	-0.543487	-0.0447966	0.722126	-0.404461	2.14777	2.6906		1	1	1	1	0.0718778	0.00012294
AT5G24105	-0.899122	-0.947772	-0.0934132	-0.432525	-1.89975	-2.14927		0.677362	0.561748	1	1	0.000485326	5.41372e-06
AT5G24200	3.19894	2.3012	1.48954	0.646018	2.99548	4.32916		6.9144e-05	0.00641866	0.0813931	1	0.000568094	9.36978e-20
AT5G24205	0.14884	-0.21008	0.655911	-0.073976	-0.29343	3.03967		1	1	1	1	1	0.000658939
AT5G24210	1.53373	1.25131	0.835337	0.650876	2.06295	2.31838		0.000337874	0.0294288	0.370627	1	1.28077e-06	9.18635e-13
AT5G24420	-0.901494	-0.379592	-1.49837	-0.749753	-0.251723	-1.6012		1	1	0.00586124	1	0.947285	0.000503726
AT5G24530	3.25523	2.27858	1.65561	1.65767	2.67119	2.87697		4.07485e-11	5.61496e-07	0.000280091	0.0286567	6.74426e-11	9.1852e-17
AT5G24540	-0.811239	0.113697	0.466211	-1.19767	1.47265	2.8485		1	1	1	1	0.535434	0.000171957
AT5G25250	1.39289	1.61575	1.08844	0.557964	2.35086	2.45802		0.183144	0.000164062	0.135434	1	2.91427e-11	7.3199e-11
AT5G25260	1.48252	1.55054	0.921137	0.654921	2.30047	2.9419		0.13783	0.0711323	1	1	1.50501e-05	4.93372e-09
AT5G25440	1.55595	1.27161	0.646556	0.422748	1.60832	1.6874		0.00565558	0.160845	1	1	0.00572871	3.42341e-05
AT5G25450	0.859328	0.727069	0.846938	0.394458	0.753218	2.26152		1	1	1	1	0.774492	5.81703e-05
AT5G25820	1.20663	1.44239	1.16688	0.912315	1.5359	2.20133		1	0.161205	1	1	0.0771736	0.000535087
AT5G25910	-0.245044	1.03916	0.452823	0.89028	2.10421	2.13942		1	1	1	1	0.0217543	0.000461371
AT5G25930	0.889032	0.872472	0.690799	0.688966	1.33936	1.96886		1	0.548821	1	1	0.00368246	0.000202716
AT5G26170	2.92645	1.65808	0.767392	1.23671	2.99828	2.42581		0.0175888	0.0611567	1	1	4.30887e-08	1.9111e-07
AT5G26690	1.37794	0.736295	0.876219	-0.0277972	2.03599	2.64977		0.307905	1	1	1	0.0124046	4.74955e-12
AT5G26920	1.93165	2.50858	1.19382	0.724987	3.1207	3.40888		0.0398909	3.17087e-09	0.134141	1	5.26013e-15	2.30222e-17
AT5G27420	1.17437	1.76403	0.258795	0.667004	2.58689	1.56182		0.763003	0.00234563	1	1	1.47449e-06	0.00790984
AT5G27600	0.494482	0.589135	0.335655	0.2498	1.60844	1.73569		1	0.948925	1	1	5.99856e-05	3.53275e-06
AT5G35735	0.157572	0.448659	0.169699	0.0774672	0.631315	1.24085		1	1	1	1	0.439812	0.000868422
AT5G35740	-0.410741	-0.545282	-0.130473	0.159602	-1.30898	-1.48683		1	1	1	1	0.00635862	0.000423594
AT5G37600	0.589288	1.12785	0.856537	0.221156	1.04675	1.49536		0.954166	0.0112127	0.359797	1	0.00818087	8.55221e-06
AT5G38210	0.620739	0.757064	0.512485	0.167744	0.960636	1.43967		1	0.70833	1	1	0.116639	0.000351068
AT5G38250	0.893521	2.50355	1.67647	0.0725703	2.95784	3.23515		1	0.00156091	0.123082	1	4.87412e-06	5.00301e-11
AT5G38900	1.33662	2.63363	1.35791	0.664492	3.76179	3.68662		0.562376	1.67786e-06	0.0391948	1	1.4584e-14	7.54112e-18
AT5G38910	0	2.5888	2.32831	0	0	4.54704		-	0.131347	0.660034	-	-	1.56844e-09
AT5G39520	0.492597	-0.231662	0.864757	0.716066	0.181071	3.36186		1	1	1	1	1	4.14075e-10
AT5G39670	2.71847	2.50978	1.20426	1.22922	3.29457	3.19055		1.02638e-06	3.43706e-06	0.0609854	1	1.60321e-10	6.4513e-18
AT5G39785	0.15574	0.833001	0.416623	-0.106232	1.47252	1.64268		1	0.885098	1	1	0.0169658	0.000256005
AT5G39950	0.674953	0.403367	0.374937	0.311911	0.96417	1.25839		0.648132	1	1	1	0.0135246	0.000180619
AT5G40010	0.892308	2.28506	2.23429	-2.13931	2.36232	5.79702		1	0.0259072	0.00896274	1	0.00901856	2.10137e-22
AT5G40230	0.652307	1.29404	1.42255	0.609793	1.41911	2.18622		1	0.404141	0.527452	1	0.0890511	0.00023644
AT5G40240	-0.437415	1.22355	0.604506	-0.482928	0.994901	2.00648		1	0.0357942	1	1	0.0952811	2.02518e-08
AT5G40780	0.431002	1.29557	0.673338	0.29141	1.91633	2.17843		1	0.0252267	1	1	7.62292e-07	7.50516e-08
AT5G40990	0	1.72023	1.62756	0	2.56856	3.66012		-	0.948925	1	-	0.0987285	6.37547e-05
AT5G41400	0.670128	0.442135	0.517854	0.362829	0.185643	1.78977		1	1	1	1	1	2.08346e-05
AT5G41610	0.298762	0.541987	0.480808	-0.0117112	0.749105	3.12644		1	1	1	1	0.882572	1.85568e-05
AT5G41740	1.00717	1.15558	0.733211	0.296545	1.59133	2.31203		0.507974	0.435196	1	1	0.0149434	1.22322e-09
AT5G41750	1.5363	1.82576	0.942928	0.450072	2.42797	2.64324		0.133182	0.000336926	1	1	1.28934e-06	5.06047e-09
AT5G42020	0.781631	0.821221	0.670407	-0.0339184	1.24998	1.43093		1	0.218983	1	1	0.00232442	0.000212276
AT5G42050	0.49206	0.983351	0.864367	0.215849	1.42071	2.36169		1	0.036212	0.466754	1	3.45124e-05	9.02754e-13
AT5G42300	0.398678	0.329191	0.264548	0.275266	0.583987	1.14819		1	1	1	1	0.321842	0.000878727
AT5G42380	1.51899	2.47068	0.882334	0.754437	2.84947	3.15558		1	0.012284	1	1	3.48099e-05	4.03023e-09
AT5G42530	2.69966	1.50791	0.597683	1.75434	1.6911	1.0033		1.79286e-09	0.000816876	1	0.0180797	2.16949e-07	0.0126132
AT5G42830	2.3544	1.89042	1.03978	1.30249	2.01278	2.29203		0.00452426	0.000614452	0.826583	1	3.83133e-05	5.39625e-07
AT5G43350	-0.681911	1.04732	-0.290918	-0.814943	1.6989	2.05579		1	1	1	1	0.299393	0.000430659
AT5G43780	0.379418	0.809313	0.497546	0.144945	1.01019	1.52878		1	0.384238	1	1	0.00927812	5.94918e-05
AT5G43910	0.818449	1.13739	0.879077	0.735855	1.19218	1.99219		1	0.253423	0.606897	1	0.107935	3.78775e-07
AT5G44020	-0.584887	-0.590263	-0.144794	-0.135938	-1.28351	-1.11692		1	0.872541	1	1	0.000173721	0.00488686
AT5G44420	-3.05016	0.283098	-1.1725	-2.69989	3.33592	1.18476		0.307517	1	1	1	6.195e-05	0.537197
AT5G44430	-4.25902	0.074703	-1.67798	-3.6383	3.82721	0.935184		0.0981145	1	1	0.85061	1.538e-10	0.687892
AT5G44460	-1.02159	1.82741	0.738233	0	1.55755	2.57256		1	0.507383	1	-	0.525015	0.000383617
AT5G44480	-0.116173	1.00974	1.73105	-0.0518777	2.12629	4.20576		1	1	0.4867	1	0.00386028	5.90311e-11
AT5G44568	2.74506	1.31657	1.05283	1.19948	1.86272	1.87166		2.3488e-09	0.0164611	0.0940117	0.392597	4.40486e-07	2.52449e-08
AT5G44570	0.773194	0.695329	1.26212	-0.26482	1.44631	2.36233		1	1	0.962108	1	0.293269	0.000103517
AT5G44575	1.28844	1.18201	0.630998	1.01273	1.94369	2.12215		0.463891	0.300949	1	1	5.61537e-05	4.32134e-07
AT5G44585	0.900579	0.926036	0.878913	0.385802	1.79251	0.680207		1	0.829499	1	1	0.000423595	0.4195
AT5G44990	0	1.90455	0.772266	0	3.15439	3.00776		-	0.375309	1	-	0.000355887	3.02893e-09
AT5G45000	0.233193	0.679043	0.218006	-0.432463	1.24704	1.60694		1	1	1	1	0.105766	4.29625e-05
AT5G45380	2.76148	1.99553	1.33574	1.31693	2.61994	2.58141		3.99914e-06	3.02652e-05	0.0690946	1	7.56768e-10	1.86892e-08
AT5G45630	-1.08453	0.0543984	-0.321474	-1.37512	-0.941958	2.49394		1	1	1	1	0.78394	1.10642e-05
AT5G45800	0.0819167	0.263784	0.653263	0.0500486	0.12876	1.79686		1	1	1	1	1	9.53971e-08
AT5G46050	0.96754	1.65041	1.84589	1.24442	2.17363	3.90066		1	0.0132057	0.0212661	1	1.48104e-05	2.11068e-17
AT5G46230	1.21004	1.41777	0.402937	0.666153	1.75717	2.11817		0.308095	0.0379127	1	1	0.00649345	1.08527e-06
AT5G46350	0.258728	1.18585	0.445556	0.170682	1.7943	3.06832		1	0.216913	1	1	0.00365979	9.25644e-12
AT5G46520	0.450781	0.825763	0.589792	0.198188	1.04227	1.544		1	0.525765	1	1	0.0343365	0.000316415
AT5G46871	0.85908	0.485572	0.410288	1.06671	1.20513	1.85397		1	1	1	1	0.0442225	2.17918e-05
AT5G46960	0	3.23146	1.71693	0	0	4.81776		-	0.00450854	1	-	-	1.10189e-11
AT5G47070	0.586211	0.365002	0.460622	0.252587	0.948791	1.36458		1	1	1	1	0.115193	0.000308067
AT5G47120	0.46039	1.14263	0.607247	0.157774	1.50586	1.85282		1	0.0207876	1	1	0.000107476	3.3918e-09
AT5G47130	0.0344948	1.29563	0.664856	-0.175247	1.6707	2.41601		1	0.501537	1	1	0.0269817	5.83965e-08
AT5G47220	0.797804	0.62406	0.343468	0.617778	1.62014	1.39741		1	0.929442	1	1	4.02459e-05	0.036797
AT5G48380	0.619416	1.06231	0.865656	0.106941	1.42846	1.70664		1	0.0206766	0.606897	1	3.94961e-05	2.68865e-07
AT5G48400	-0.63849	1.54878	0.888978	-0.221345	1.88694	4.10692		1	0.368433	1	1	0.0386054	2.98026e-22
AT5G48540	1.26988	1.31413	0.846353	0.928915	1.90288	2.15273		0.0855118	0.00894709	0.861664	1	3.22527e-07	3.76348e-08
AT5G48657	1.80659	2.06444	0.879131	1.03779	2.49389	2.07081		0.0543658	0.0220383	0.859616	1	1.41545e-05	6.89728e-08
AT5G49520	-0.447709	1.48507	0.821283	-0.892665	2.21629	3.07105		1	0.330309	1	1	0.00127568	1.00093e-09
AT5G49680	1.14257	0.60457	1.00397	0.377578	1.44716	1.88769		1	1	1	1	0.0145341	0.000291927
AT5G50200	0.57532	1.10806	0.940841	0.297146	1.39684	1.68623		1	0.134123	0.870465	1	0.00346138	7.44085e-06
AT5G50760	-1.15114	0.78345	0.00837075	-0.484106	0.59937	3.01942		1	1	1	1	1	1.84494e-05
AT5G51630	0.397373	1.1716	0.567353	0.460026	1.47938	1.88906		1	0.358947	1	1	0.0102808	6.48638e-05
AT5G52390	0	3.10383	1.36145	0	4.12409	3.39225		-	0.000740917	0.442011	-	2.10973e-08	2.02605e-13
AT5G52640	1.08076	1.27642	0.501232	0.463322	2.39868	1.03093		0.367334	0.0342108	1	1	1.39856e-06	0.0896825
AT5G52720	0	1.37198	0.899409	0	3.11327	3.33134		-	0.994742	1	-	1.55632e-05	1.20215e-08
AT5G52730	0.0555704	1.6743	1.19707	0	1.63826	3.07648		1	0.743995	1	-	0.448894	4.48297e-07
AT5G52740	0.887255	0.638211	1.28687	-0.736445	1.51705	3.0019		1	1	1	1	0.30132	3.13442e-05
AT5G52750	2.15528	1.44841	0.824677	1.23875	1.98027	2.01673		0.000384678	0.00156309	1	0.630234	7.1027e-08	8.15515e-07
AT5G52760	2.75992	2.13532	1.50532	1.15581	2.98619	3.05987		0.000650019	3.5392e-06	0.0227818	1	2.67095e-11	5.54578e-17
AT5G52810	1.8469	1.36199	1.10409	0.211115	2.2529	2.412		0.00111091	0.0126068	0.0799534	1	3.74885e-08	2.49999e-10
AT5G53110	0.287937	1.40543	2.46011	0.238274	2.10323	4.01375		1	0.371235	0.02699	1	0.00188304	1.66685e-12
AT5G53120	0.663977	0.897314	0.326767	0.250022	1.29178	1.58349		1	0.289357	1	1	0.00993724	1.07999e-05
AT5G53370	0.413058	0.967568	0.759395	0.176971	1.2918	1.48757		1	0.615367	0.734874	1	0.0517504	2.09547e-05
AT5G53550	0.646463	0.788086	0.522327	0.294865	1.48072	1.32787		1	0.447054	1	1	0.000150597	0.00156802
AT5G53588	0.212389	-0.131082	0.427653	-0.168309	-0.18384	1.5485		1	1	1	1	1	0.00076463
AT5G53870	0.87466	0.449761	1.78143	-0.18666	0.576979	3.19135		1	1	0.0754349	1	0.860875	5.59521e-10
AT5G54140	0.722645	1.23643	0.793274	0.116279	1.22306	1.86586		1	0.322471	1	1	0.136585	0.000164017
AT5G54610	2.07743	1.14516	0.63389	1.05076	1.95951	2.08273		2.6709e-06	0.0162842	1	1	3.44348e-09	2.49999e-10
AT5G54710	0.593718	1.18634	0.668394	0.405126	1.2757	1.20535		1	0.0782838	1	1	0.000908685	0.0145159
AT5G55420	2.28084	1.58577	0.490895	-0.326326	2.79749	2.0389		0.241937	0.0839392	1	1	1.18728e-07	0.000846395
AT5G55450	2.71454	1.92878	1.4056	1.3578	1.97384	2.13488		2.61398e-07	0.000170629	0.028338	0.775134	0.000176891	5.14412e-10
AT5G55460	1.50182	2.40461	1.29044	0.684779	2.77363	2.26173		0.137916	1.65321e-07	0.0395644	1	1.02731e-09	5.34006e-11
AT5G55470	0.711375	2.39947	1.38083	-0.366062	2.76357	2.18097		1	4.03943e-05	0.150449	1	2.4486e-07	2.83857e-05
AT5G55560	-0.00368744	0.754525	0.562837	-0.0759826	1.35966	1.9478		1	1	1	1	0.0961516	0.000483939
AT5G56050	-0.480322	0.973735	1.39265	-1.08252	0.336037	3.0759		1	1	1	1	1	2.53413e-06
AT5G56970	0.198961	1.45239	-1.3001	-1.75418	0	3.2224		1	1	1	1	-	1.37062e-07
AT5G57010	-1.08013	1.26228	2.29726	-0.0782537	2.16473	3.61647		1	1	0.0492806	1	0.0397829	4.11981e-06
AT5G57220	0.921974	1.61009	0.0941866	0.88817	2.23734	0.950556		1	0.00632506	1	1	2.98585e-06	0.21053
AT5G57480	-0.44543	0.803626	1.04032	-0.375742	1.52405	3.5324		1	1	1	1	0.0291522	2.62729e-10
AT5G57510	0	1.0004	-0.177328	0	2.56751	3.08947		-	1	1	-	0.0677867	1.01644e-07
AT5G57760	0.276277	-0.751395	-0.175034	0.687559	-1.16428	-2.03601		1	1	1	1	0.300827	0.000106138
AT5G58350	0.426096	0.790909	0.450616	0.78701	1.57766	2.14956		1	0.65986	1	1	0.000240737	1.96961e-06
AT5G58620	0.257211	0.494822	0.741352	0.144073	0.770328	1.78044		1	1	1	1	0.579123	4.6806e-05
AT5G58770	0.7429	1.27347	-0.0245832	-0.181181	2.66432	2.11049		1	0.148687	1	1	4.08763e-07	3.67819e-05
AT5G58940	-0.0657525	0.596932	0.848642	-0.165074	1.25554	1.59217		1	1	1	1	0.0169754	0.000132812
AT5G59220	-0.552081	0.999803	0.954903	0	0.584848	3.20207		1	1	1	-	0.96151	7.75811e-05
AT5G59530	-0.0793635	2.16994	0.381826	-0.645267	3.58184	2.05749		1	0.279986	1	1	5.74772e-05	0.00181871
AT5G59670	2.92805	1.74734	0.721214	1.19195	2.10855	1.38772		4.07485e-11	0.0398461	1	1	0.00133762	0.00135043
AT5G59680	1.80649	1.99867	0.58494	1.30798	2.33901	1.02559		0.702674	0.026122	1	1	0.000579216	0.362046
AT5G59820	0.318997	0.519198	0.210918	0.590978	1.39138	2.89723		1	1	1	1	0.0726826	2.01778e-06
AT5G60280	0.106813	1.89334	1.17881	-1.19655	2.59199	2.47942		1	0.364952	1	1	0.00457825	4.08599e-05
AT5G60285	0.147159	0.989462	-0.0709271	-0.438549	2.32894	2.33559		1	1	1	1	0.00200092	2.93944e-05
AT5G60800	0.489661	1.00148	0.677607	-0.472232	1.4741	1.84244		1	0.159058	1	1	0.00594697	1.13935e-06
AT5G60900	2.17995	1.96586	0.558705	0.693025	2.52755	1.6192		0.000860755	0.0413563	1	1	0.00145305	9.23676e-06
AT5G60950	1.65436	1.82789	1.25826	0.174117	2.46699	2.17353		0.00785201	0.000999665	0.328631	1	1.78965e-05	1.96961e-06
AT5G61010	0.488007	0.776818	0.555882	0.100407	1.45715	1.53854		1	0.364106	1	1	8.56699e-06	0.000103897
AT5G61160	-1.72818	-0.00733241	-0.591968	-0.924564	2.44104	0.21441		1	1	1	1	6.7988e-05	0.9297
AT5G61210	0.383177	0.806211	0.573863	0.086446	1.10991	1.40553		1	0.486934	1	1	0.00388808	0.000150879
AT5G61790	0.794237	0.659397	0.636275	0.0784828	0.908798	1.37351		0.778369	0.68366	1	1	0.101327	2.45914e-05
AT5G61900	0.875935	0.600018	0.313675	0.703995	0.927785	1.7066		0.929666	1	1	1	0.101586	1.41486e-05
AT5G62360	-1.28135	-0.803609	-0.49316	-0.0282425	-1.15825	-1.58438		0.677362	0.895473	1	1	0.0839172	0.000717195
AT5G62770	0.707743	1.03	1.38654	0.216431	1.6095	3.16506		1	0.718687	0.251142	1	0.00452432	9.73549e-10
AT5G62920	-0.486668	-0.919712	-0.588894	-0.202468	-1.46256	-1.53687		1	0.544776	1	1	0.00426912	0.000396979
AT5G63030	0.126487	0.516736	0.291124	-0.0714577	0.948804	1.24431		1	1	1	1	0.16768	0.000818409
AT5G63225	0.710502	4.47189	2.29647	0	3.40382	6.14992		1	6.76556e-10	0.00786762	-	0.000196014	1.37917e-28
AT5G63680	0.429612	0.521096	0.547502	0.168899	1.02971	1.79347		1	1	1	1	0.00904876	2.5773e-06
AT5G64000	1.95734	2.00601	1.81009	1.12877	2.40233	2.74764		0.0342734	0.000411212	0.00817203	1	8.84391e-06	3.11602e-09
AT5G64040	-0.115821	-0.381819	-0.346407	0.0614033	-0.399054	-1.20266		1	1	1	1	0.747939	0.000587498
AT5G64120	0.917337	0.701385	0.70148	0.570139	1.71746	1.98319		1	0.634359	0.993756	1	1.82459e-06	2.76511e-08
AT5G64510	1.19751	1.74461	0.804061	0.378263	2.60125	2.31606		0.872628	0.00365017	1	1	4.69328e-10	9.23676e-06
AT5G64810	3.50997	2.88118	1.14479	0.913274	3.75076	3.33023		1.1306e-06	4.82462e-06	0.527452	1	9.69551e-13	2.35279e-12
AT5G64870	-0.182351	-0.109795	0.032541	0.275596	1.12036	2.25694		1	1	1	1	0.436691	0.000130332
AT5G65090	1.16149	0.897211	0.566479	0.127387	0.94066	2.19865		1	1	1	1	0.653984	0.000750921
AT5G65390	-0.807624	-1.14245	0.126887	0.0308813	-1.65499	-0.0270016		0.864687	0.0312461	1	1	0.000556056	1
AT5G65730	-0.482657	-0.9099	-0.258885	-0.210064	-0.993703	-1.72615		1	0.35137	1	1	0.0456597	0.000223235
AT5G66400	0.104043	0.925577	-0.111755	-0.362811	1.38579	1.94569		1	1	1	1	0.116358	0.000462663
AT5G66630	0.449898	1.66973	0.691998	-0.242201	1.86947	1.91394		1	0.0446718	1	1	0.00435308	0.000391418
AT5G66640	0.721804	1.84508	0.953847	-0.192432	2.04601	1.92668		1	0.00298155	1	1	0.000532502	0.00272855
AT5G66690	-1.31851	-1.17056	3.10174	-1.79519	-0.953385	4.92669		1	1	0.0177395	1	0.792462	2.40247e-11
AT5G66890	0.407617	-0.257392	0.914534	0.139048	-0.725056	3.23567		1	1	1	1	0.821532	2.03685e-10
AT5G67310	-0.708479	0.975207	-0.305001	-0.252741	0.98133	2.00153		1	1	1	1	0.634058	0.000202611
AT5G67340	0.57965	1.69913	1.51834	0.97102	2.08014	3.35244		1	0.00822229	0.0115577	1	8.50104e-06	5.21296e-15
aArabidopsis genome initiative number
bRelative expression levels compared to mock are indicated by value of log2.
cFalse discovery rate (FDR) from three biological replicates.
